# Supplementary material for: TP53/miR-34a-associated signaling targets SERPINE1 expression in human pancreatic cancer
Source: Aging (Albany NY). 2020 Jan 27;12(3):2777–97. doi: 10.18632/aging.102776 (PMC7041729; doi:10.18632/aging.102776)
Supplement: Supplementary Table 1 [file aging-12-102776-s001..xlsx]

## Sheet: Sheet1
Supplemental Table 1
Antibody Name	Antibody Origin	Gene Name	Validation Status	Antibody Name in Heatmap
14-3-3-beta	R	YWHAB	V	14-3-3-beta-R-V
14-3-3-epsilon	M	YWHAE	C	14-3-3-epsilon-M-C
14-3-3-zeta	R	YWHAZ	V	14-3-3-zeta-R-V
4E-BP1	R	EIF4EBP1	V	4E-BP1-R-V
4E-BP1_pS65	R	EIF4EBP1	V	4E-BP1_pS65-R-V
4E-BP1_pT37_T46	R	EIF4EBP1	V	4E-BP1_pT37_T46-R-V
53BP1	R	TP53BP1	V	53BP1-R-V
A-Raf	R	ARAF	V	A-Raf-R-V
A-Raf_pS299	R	ARAF	C	A-Raf_pS299-R-C
ACC1	R	ACACA/ ACACB	C	ACC1-R-C
ACC_pS79	R	ACACA/ACACB	V	ACC_pS79-R-V
AceCS1	R	ACSS2	V	AceCS1-R-V
ACLY_pS455	R	ACLY	V	ACLY_pS455-R-V
ACSL1	R	ACSL1	V	ACSL1-R-V
ACVRL1	R	ACVRL1	C	ACVRL1-R-C
ADAR1	M	ADAR	V	ADAR1-M-V
Akt	R	AKT1/2/3	V	Akt-R-V
Akt1	R	AKT1	V	Akt1-R-V
Akt1_pS473	R	AKT1	V	Akt1_pS473-R-V
Akt2	R	AKT2	V	Akt2-R-V
Akt2_pS474	R	AKT2	C	Akt2_pS474-R-C
Akt_pS473	R	AKT1/2/3	V	Akt_pS473-R-V
Akt_pT308	R	AKT1/2/3	V	Akt_pT308-R-V
Ambra1_pS52	R	AMBRA1	C	Ambra1_pS52-R-C
AMPK-a2_pS345	R	PRKAA2	V	AMPK-a2_pS345-R-V
AMPKa	R	PRKAA1/2	C	AMPKa-R-C
AMPKa_pT172	R	PRKAA1/2	C	AMPKa_pT172-R-C
Annexin-I	M	ANXA1	V	Annexin-I-M-V
Annexin-VII	M	ANXA7	V	Annexin-VII-M-V
AR	R	AR	V	AR-R-V
ARID1A	R	ARID1A	C	ARID1A-R-C
ASNS	R	ASNS	V	ASNS-R-V
Atg3	R	ATG3	V	Atg3-R-V
Atg4B	R	ATG4B	C	Atg4B-R-C
Atg5	R	ATG5	C	Atg5-R-C
Atg7	R	ATG7	V	Atg7-R-V
ATM	R	ATM	V	ATM-R-V
ATM_pS1981	R	ATM	V	ATM_pS1981-R-V
ATP5A	M	ATP5F1A	C	ATP5A-M-C
ATP5H	M	ATP5HD	C	ATP5H-M-C
ATR	R	ATR	V	ATR-R-V
ATRX	R	ATRX	C	ATRX-R-C
ATR_pS428	R	ATR	C	ATR_pS428-R-C
Aurora-A	R	AURKA	C	Aurora-A-R-C
Aurora-ABC_pT288_pT232_pT198	R	AURKA-C	C	Aurora-ABC_pT288_pT232_pT198-R-C
Aurora-B	R	AURKB	V	Aurora-B-R-V
Axl	R	AXL	V	Axl-R-V
b-Actin	R	ACTB	C	b-Actin-R-C
b-Catenin	R	CTNNB1	V	b-Catenin-R-V
b-Catenin_pT41_S45	R	CTNNB1	V	b-Catenin_pT41_S45-R-V
B-Raf	R	BRAF	C	B-Raf-R-C
B-Raf_pS445	R	BRAF	V	B-Raf_pS445-R-V
B7-H3	R	CD276	C	B7-H3-R-C
B7-H4	R	VTCN1	C	B7-H4-R-C
Bad_pS112	R	BAD	V	Bad_pS112-R-V
Bak	R	BAK1	C	Bak-R-C
BAP1	M	BAP1	V	BAP1-M-V
Bax	R	BAX	V	Bax-R-V
Bcl-xL	R	BCL2L1	V	Bcl-xL-R-V
Bcl2	R	BCL2	V	Bcl2-R-V
BCL2A1	R	BCL2A1	V	BCL2A1-R-V
Beclin	R	BECN1	C	Beclin-R-C
Bid	R	BID	C	Bid-R-C
Bim	R	BCL2L11	V	Bim-R-V
BiP-GRP78	M	HSPA5	C	BiP-GRP78-M-C
BMK1-Erk5_pT218_Y220	R	MAPK7	V	BMK1-Erk5_pT218_Y220-R-V
BRCA1	M	BRCA1	C	BRCA1-M-C
BRD4	R	BRD4	V	BRD4-R-V
c-Abl	R	ABL1	V	c-Abl-R-V
c-Abl_pY412	R	ABL1	C	c-Abl_pY412-R-C
c-IAP2	R	BIRC3	C	c-IAP2-R-C
c-Jun_pS73	R	JUN	V	c-Jun_pS73-R-V
c-Kit	R	KIT	V	c-Kit-R-V
c-Met_pY1234_Y1235	R	MET	V	c-Met_pY1234_Y1235-R-V
c-Myc	R	MYC	C	c-Myc-R-C
C-Raf	R	RAF1	C	C-Raf-R-C
C-Raf_pS338	R	RAF1	V	C-Raf_pS338-R-V
CA9	R	CA9	C	CA9-R-C
Calnexin	R	CANX	V	Calnexin-R-V
Caspase-3-cleaved	R	CASP3	C	Caspase-3-cleaved-R-C
Caspase-7-cleaved-	R	CASP7	C	Caspase-7-cleaved--R-C
Caspase-8	M	CASP8	Q	Caspase-8-M-Q
Caspase-8-cleaved	R	CASP8	C	Caspase-8-cleaved-R-C
Caveolin-1	R	CAV1	V	Caveolin-1-R-V
CD134	R	TNFRSF4	V	CD134-R-V
CD171	M	L1CAM	V	CD171-M-V
CD20	R	MS4A1	C	CD20-R-C
CD26	R	DPP4	V	CD26-R-V
CD29	M	ITGB1	V	CD29-M-V
CD31	M	PECAM1	V	CD31-M-V
CD38	R	CD38	C	CD38-R-C
CD4	R	CD4	V	CD4-R-V
CD44	R	CD44	C	CD44-R-C
CD45	M	PTPRC	V	CD45-M-V
CD49b	M	ITGA2	V	CD49b-M-V
CD68	M	CD68	C	CD68-M-C
CD86	R	CD86	C	CD86-R-C
cdc25C	R	CDC25C	V	cdc25C-R-V
cdc2_pY15	R	CDK1	C	cdc2_pY15-R-C
Cdc42	R	CDC42/RAC1	C	Cdc42-R-C
Cdc6	R	CDC6	V	Cdc6-R-V
CDK1_pT14	R	CDK1/2/3	C	CDK1_pT14-R-C
CDKN2A	R	CDKN2A	C	CDKN2A-R-C
CDT1	R	CDT1	V	CDT1-R-V
Chk1	M	CHEK1	C	Chk1-M-C
Chk1_pS296	R	CHEK1	V	Chk1_pS296-R-V
Chk1_pS345	R	CHEK1	C	Chk1_pS345-R-C
Chk2	M	CHEK2	V	Chk2-M-V
Chk2_pT68	R	CHEK2	C	Chk2_pT68-R-C
CIITA	R	CIITA	C	CIITA-R-C
Claudin-7	R	CLDN7	V	Claudin-7-R-V
COG3	R	COG3	V	COG3-R-V
Collagen-VI	R	COL6A1	V	Collagen-VI-R-V
Complex-II-Subunit	M	SDHB	V	Complex-II-Subunit-M-V
Connexin-43	R	GJA1	C	Connexin-43-R-C
Coup-TFII	R	NR2F2	C	Coup-TFII-R-C
Cox-IV	R	COX4I1	V	Cox-IV-R-V
Cox2	R	PTGS2	C	Cox2-R-C
Creb	R	CREB1	C	Creb-R-C
CREB_pS133	R	CREB1	C	CREB_pS133-R-C
CSK	R	CSK	C	CSK-R-C
CtIP	R	RBBP8	V	CtIP-R-V
Cyclin-B1	R	CCNB1	V	Cyclin-B1-R-V
Cyclin-D1	R	CCND1	C	Cyclin-D1-R-C
Cyclin-D3	M	CCND3	V	Cyclin-D3-M-V
Cyclin-E1	R	CCNE1	V	Cyclin-E1-R-V
Cyclophilin-F	M	PPIF	V	Cyclophilin-F-M-V
D-a-Tubulin	R	TUBA4A/TUBA3C	V	D-a-Tubulin-R-V
DAPK1_pS308	M	DAPK1	C	DAPK1_pS308-M-C
DAPK2	R	DAPK2	C	DAPK2-R-C
DDB-1	R	DDB1	V	DDB-1-R-V
DDR1	R	DDR1	V	DDR1-R-V
DDR1_pY513	R	DDR1	C	DDR1_pY513-R-C
DJ1	R	PARK7	V	DJ1-R-V
DM-Histone-H3	R	HIST1H3A	V	DM-Histone-H3-R-V
DM-K9-Histone-H3	M	HIST1H3A-J	V	DM-K9-Histone-H3-M-V
DNA-Ligase-IV	R	LIG4	C	DNA-Ligase-IV-R-C
DNA_POLG	R	POLG	V	DNA_POLG-R-V
DNMT1	R	DNMT1	V	DNMT1-R-V
DRP1	R	DNM1L	V	DRP1-R-V
DUSP4	R	DUSP4	V	DUSP4-R-V
DUSP6	R	DUSP6	C	DUSP6-R-C
DVL3	R	DVL3	V	DVL3-R-V
E-Cadherin	R	CDH1	V	E-Cadherin-R-V
E2F1	M	E2F1	V	E2F1-M-V
eEF2	R	EEF2	C	eEF2-R-C
eEF2K	R	EEF2K	V	eEF2K-R-V
EGFR	R	EGFR	V	EGFR-R-V
EGFR_pY1173	R	EGFR	V	EGFR_pY1173-R-V
eIF4E	R	EIF4E	V	eIF4E-R-V
eIF4E_pS209	R	EIF4E	V	eIF4E_pS209-R-V
eIF4G	R	EIF4G1	C	eIF4G-R-C
Elk1_pS383	R	ELK1	C	Elk1_pS383-R-C
EMA	M	MUC1	C	EMA-M-C
Enolase-1	R	ENO1	V	Enolase-1-R-V
Enolase-2	R	ENO2	V	Enolase-2-R-V
ENY2	M	ENY2	C	ENY2-M-C
EphA2	R	EPHA2	V	EphA2-R-V
EphA2_pS897	R	EPHA2	C	EphA2_pS897-R-C
EphA2_pY588	R	EPHA2	C	EphA2_pY588-R-C
ER-a	R	ESR1	V	ER-a-R-V
ER-a_pS118	R	ESR1	V	ER-a_pS118-R-V
ERCC1	M	ERCC1	V	ERCC1-M-V
ERCC5	R	ERCC5	C	ERCC5-R-C
Erk5	R	MAPK7	V	Erk5-R-V
ERRalpha	R	ESRRA	V	ERRalpha-R-V
Ets-1	R	ETS1	V	Ets-1-R-V
FAK	R	PTK2	C	FAK-R-C
FAK_pY397	R	PTK2	V	FAK_pY397-R-V
FASN	R	FASN	V	FASN-R-V
FGF-basic	R	FGF2	C	FGF-basic-R-C
Fibronectin	R	FN1	V	Fibronectin-R-V
FN14	R	TNFRSF12A	C	FN14-R-C
FOXM1	R	FOXM1	V	FOXM1-R-V
FOXO3	R	FOXO3	V	FOXO3-R-V
FoxO3a_pS318_S321	R	FOXO3	C	FoxO3a_pS318_S321-R-C
FRS2-a_pY196	R	FRS2	C	FRS2-a_pY196-R-C
G6PD	R	G6PD	V	G6PD-R-V
Gab2	R	GAB2	V	Gab2-R-V
GAPDH	R	GAPDH	C	GAPDH-R-C
GATA3	M	GATA3	V	GATA3-M-V
GATA6	R	GATA6	V	GATA6-R-V
GCLC	R	GCLC	C	GCLC-R-C
GCLM	R	GCLM	C	GCLM-R-C
GCN5L2	R	KAT2A	V	GCN5L2-R-V
Gli1	R	GLI1	C	Gli1-R-C
Gli3	R	GLI3	C	Gli3-R-C
Glutamate-D1-2	R	GLUD1	V	Glutamate-D1-2-R-V
Glutaminase	R	GLS	C	Glutaminase-R-C
Granzyme-B	R	GZMB	V	Granzyme-B-R-V
GRB7	R	GRB7	V	GRB7-R-V
Grp75	R	HSPA9	C	Grp75-R-C
GSK-3a-b	M	GSK3A/GSK3B	V	GSK-3a-b-M-V
GSK-3a-b_pS21_S9	R	GSK3A/GSK3B	V	GSK-3a-b_pS21_S9-R-V
GSK-3B	R	GSK3B	C	GSK-3B-R-C
Gys	R	GYS1	V	Gys-R-V
Gys_pS641	R	GYS1	V	Gys_pS641-R-V
H2AX_pS139	R	H2AFX	C	H2AX_pS139-R-C
H2AX_pS140	M	H2AFX	C	H2AX_pS140-M-C
HER2	M	ERBB2	V	HER2-M-V
HER2_pY1248	R	ERBB2	C	HER2_pY1248-R-C
HER3	R	ERBB3	V	HER3-R-V
HER3_pY1289	R	ERBB3	C	HER3_pY1289-R-C
Heregulin	R	NRG1	V	Heregulin-R-V
HES1	R	HES1	V	HES1-R-V
Hexokinase-I	R	HK1	C	Hexokinase-I-R-C
Hexokinase-II	R	HK2	V	Hexokinase-II-R-V
Hif-1-alpha	R	HIF1A	C	Hif-1-alpha-R-C
Histone-H3	R	HIST1H3A-F	V	Histone-H3-R-V
Histone-H3_pS10	R	HIST1H3A-J	V	Histone-H3_pS10-R-V
HLA-DQA1	R	HLA-DQA1	V	HLA-DQA1-R-V
HLA-DR-DP-DQ-DX	R	HLA-DRA	C	HLA-DR-DP-DQ-DX-R-C
HMHA1	R	ARHGAP45	V	HMHA1-R-V
HSP27	M	HSBP1	C	HSP27-M-C
HSP27_pS82	R	HSBP1	V	HSP27_pS82-R-V
HSP60	R	HSPD1	V	HSP60-R-V
HSP70	R	HSPA1A	C	HSP70-R-C
IDO	R	IDO1	C	IDO-R-C
IGF1R_pY1135_Y1136	R	IGF1R/INSR	V	IGF1R_pY1135_Y1136-R-V
IGFBP2	R	IGFBP2	V	IGFBP2-R-V
IGFBP3	M	IGFBP3	V	IGFBP3-M-V
IGFRb	R	IGF1R	C	IGFRb-R-C
IL-6	R	IL6	C	IL-6-R-C
INPP4b	R	INPP4B	C	INPP4b-R-C
IR-b	R	INSR	C	IR-b-R-C
IRF-1	R	IRF1	C	IRF-1-R-C
IRS1	R	IRS1	V	IRS1-R-V
IRS2	R	IRS2	C	IRS2-R-C
JAB1	M	COPS5	C	JAB1-M-C
Jagged1	R	JAG1	V	Jagged1-R-V
Jak2	R	JAK2	V	Jak2-R-V
JNK_pT183_Y185	R	MAPK8	C	JNK_pT183_Y185-R-C
KAP1	R	TRIM28	V	KAP1-R-V
LAD1	R	LAD1	V	LAD1-R-V
Lasu1	R	HUWE1	V	Lasu1-R-V
LC3A-B	R	MAP1LC3A/B	C	LC3A-B-R-C
Lck	R	LCK	V	Lck-R-V
LDHA	R	LDHA	C	LDHA-R-C
LRP6_pS1490	R	LRP6	V	LRP6_pS1490-R-V
Lyn	R	LYN	V	Lyn-R-V
MAPK_pT202_Y204	R	MAPK1/MAPK3	C	MAPK_pT202_Y204-R-C
Mcl-1	R	MCL1	V	Mcl-1-R-V
MCT4	R	SLC16A3	V	MCT4-R-V
MDM2_pS166	R	MDM2	V	MDM2_pS166-R-V
MEK1	R	MAP2K1	V	MEK1-R-V
MEK1_p_S217_S221	R	MAP2K1/MAP2K2	V	MEK1_p_S217_S221-R-V
MEK2	R	MAP2K2	V	MEK2-R-V
MelanA	R	MLANA	C	MelanA-R-C
Melanoma-gp100	R	PMEL	C	Melanoma-gp100-R-C
MERIT40	R	BABAM1	C	MERIT40-R-C
MERIT40_pS29	R	BABAM1	V	MERIT40_pS29-R-V
Merlin	R	NF2	C	Merlin-R-C
MIF	R	MIF	C	MIF-R-C
MIG6	M	ERRFI1	V	MIG6-M-V
MITF	R	MITF	V	MITF-R-V
Mitofusin-1	R	MFN1	V	Mitofusin-1-R-V
Mitofusin-2	R	MFN2	V	Mitofusin-2-R-V
MLH1	M	MLH1	V	MLH1-M-V
MLKL	R	MLKL	V	MLKL-R-V
MMP14	R	MMP14	V	MMP14-R-V
MMP2	R	MMP2	V	MMP2-R-V
Mnk1	R	MKNK1	V	Mnk1-R-V
MR1	M	MR1	C	MR1-M-C
MRAP	R	MRAP	C	MRAP-R-C
MSH2	R	MSH2	C	MSH2-R-C
MSH6	R	MSH6	C	MSH6-R-C
MSI2	R	MSI2	C	MSI2-R-C
MTCO1	M	MT-CO1	V	MTCO1-M-V
mTOR	R	MTOR	V	mTOR-R-V
mTOR_pS2448	R	MTOR	C	mTOR_pS2448-R-C
MTSS1	M	MTSS1	C	MTSS1-M-C
MYH11	R	MYH11	C	MYH11-R-C
Myosin-IIa	R	MYH9	C	Myosin-IIa-R-C
Myosin-IIa_pS1943	R	MYH9	V	Myosin-IIa_pS1943-R-V
Myt1	R	PKMYT1	C	Myt1-R-C
N-Cadherin	R	CDH2	V	N-Cadherin-R-V
N-Ras	M	NRAS	V	N-Ras-M-V
NAPSIN-A	R	NAPSA	C	NAPSIN-A-R-C
NDRG1_pT346	R	NDRG1	V	NDRG1_pT346-R-V
NDUFB4	R	NDUFB4	V	NDUFB4-R-V
NF-kB-p65_pS536	R	RELA	C	NF-kB-p65_pS536-R-C
Notch1	R	NOTCH1	V	Notch1-R-V
Notch1-cleaved	R	NOTCH1	V	Notch1-cleaved-R-V
Notch3	R	NOTCH3	C	Notch3-R-C
NQO1	M	NQO1	V	NQO1-M-V
NRF2	R	NFE2L2	C	NRF2-R-C
Oct-4	R	POU5F1	C	Oct-4-R-C
P-Cadherin	R	CDH3	C	P-Cadherin-R-C
p21	R	CDKN1A	C	p21-R-C
p27-Kip1	R	CDKN1B	V	p27-Kip1-R-V
p27_pT157	R	CDKN1B	C	p27_pT157-R-C
p27_pT198	R	CDKN1B	V	p27_pT198-R-V
p38-a	M	MAPK14	V	p38-a-M-V
p38-MAPK	R	MAPK14/11/12	V	p38-MAPK-R-V
p38-MAPK-_pT180_Y182	R	MAPK11/13/12/14	V	p38-MAPK-_pT180_Y182-R-V
p44-42-MAPK	R	MAPK1/MAPK3	V	p44-42-MAPK-R-V
p53	R	TP53	C	p53-R-C
p70-S6K1	R	RPS6KB1	V	p70-S6K1-R-V
p70-S6K_pT389	R	RPS6KB1	V	p70-S6K_pT389-R-V
p90RSK_pT573	R	RPS6KA1	C	p90RSK_pT573-R-C
PAI-1	M	SERPINE1	V	PAI-1-M-V
PAICS	R	PAICS	C	PAICS-R-C
PAK1	R	PAK1	V	PAK1-R-V
PAK4	R	PAK4	V	PAK4-R-V
PAR	R	PAR Modification	C	PAR-R-C
PARG	R	PARG	C	PARG-R-C
PARP	R	PARP1	V	PARP-R-V
Patched	R	PTCH1	C	Patched-R-C
PAX8	R	PAX8	C	PAX8-R-C
Paxillin	R	PXN	C	Paxillin-R-C
PCNA	M	PCNA	C	PCNA-M-C
PD-1	R	PDCD1	V	PD-1-R-V
PD-L1	R	CD274	C	PD-L1-R-C
Pdcd4	R	PDCD4	C	Pdcd4-R-C
PDGFRB	R	PDGFRB	V	PDGFRB-R-V
PDH	M	DLAT	V	PDH-M-V
PDHA1	R	PDHA1	V	PDHA1-R-V
PDHK1	R	PDK1	C	PDHK1-R-C
PDK1	R	PDPK1	V	PDK1-R-V
PDK1_pS241	R	PDPK1	V	PDK1_pS241-R-V
PEA-15	R	PEA15	V	PEA-15-R-V
PEA-15_pS116	R	PEA15	V	PEA-15_pS116-R-V
PERK	R	EIF2AK3	V	PERK-R-V
PHGDH	R	PHGDH	C	PHGDH-R-C
PHLPP	R	PHLPP1	V	PHLPP-R-V
PI3K-p110-a	R	PIK3CA	C	PI3K-p110-a-R-C
PI3K-p110-b	M	PIK3CB	C	PI3K-p110-b-M-C
PI3K-p85	R	PIK3R1	V	PI3K-p85-R-V
PKA-a	R	PRKAR1A	V	PKA-a-R-V
PKC-a-b-II_pT638_T641	R	PRKCA/PRKCB	V	PKC-a-b-II_pT638_T641-R-V
PKC-b-II_pS660	R	PRKCA/B/D/E/H/Q	V	PKC-b-II_pS660-R-V
PKC-delta_pS664	R	PRKCD	V	PKC-delta_pS664-R-V
PKCa	R	PRKCA	V	PKCa-R-V
PKM2	R	PKM	C	PKM2-R-C
PLC-gamma2_pY759	R	PLCG2	V	PLC-gamma2_pY759-R-V
PLK1	R	PLK1	C	PLK1-R-C
PMS2	R	PMS2	V	PMS2-R-V
Porin	M	VDAC1	V	Porin-M-V
PR	R	PGR	V	PR-R-V
PRAS40	M	AKT1S1	C	PRAS40-M-C
PRAS40_pT246	R	AKT1S1	V	PRAS40_pT246-R-V
PRC1_pT481	R	PRC1	C	PRC1_pT481-R-C
PREX1	R	PREX1	V	PREX1-R-V
PTEN	R	PTEN	V	PTEN-R-V
PTPN12	R	PTPN12	V	PTPN12-R-V
Puma	R	BBC3	C	Puma-R-C
PYGB	R	PYGB	V	PYGB-R-V
PYGM	M	PYGM	C	PYGM-M-C
Pyk2_pY402	R	PTK2B	C	Pyk2_pY402-R-C
Rab11	R	RAB11A/B	C	Rab11-R-C
Rab25	R	RAB25	V	Rab25-R-V
Rad23A	R	RAD23A	C	Rad23A-R-C
Rad50	R	RAD50	V	Rad50-R-V
Rad51	R	RAD51	C	Rad51-R-C
Raptor	R	RPTOR	V	Raptor-R-V
Rb	M	RB1	Q	Rb-M-Q
RBM15	R	RBM15	V	RBM15-R-V
Rb_pS807_S811	R	RB1	V	Rb_pS807_S811-R-V
Rheb	M	RHEB	C	Rheb-M-C
Rictor	R	RICTOR	C	Rictor-R-C
Rictor_pT1135	R	RICTOR	V	Rictor_pT1135-R-V
RIP	R	RIPK1	C	RIP-R-C
RIP3	R	RIPK3	C	RIP3-R-C
RPA32	R	RPA2	V	RPA32-R-V
RPA32_pS4_S8	R	RPA2	C	RPA32_pS4_S8-R-C
RRM1	R	RRM1	C	RRM1-R-C
RRM2	R	RRM2	C	RRM2-R-C
RSK	R	RPS6KA1/2/3	C	RSK-R-C
S100A4	R	S100A4	V	S100A4-R-V
S6	M	RPS6	V	S6-M-V
S6_pS235_S236	R	RPS6	V	S6_pS235_S236-R-V
S6_pS240_S244	R	RPS6	V	S6_pS240_S244-R-V
SCD	M	SCD	V	SCD-M-V
SDHA	R	SDHA	V	SDHA-R-V
SETD2	R	SETD2	C	SETD2-R-C
SF2	M	SRSF1	V	SF2-M-V
SFRP1	R	SFRP1	C	SFRP1-R-C
SGK1	R	SGK1	V	SGK1-R-V
SGK3	R	SGK3	V	SGK3-R-V
Shc_pY317	R	SHC1	V	Shc_pY317-R-V
SHP-2_pY542	R	PTPN11	C	SHP-2_pY542-R-C
SHP2	R	PTPN11	V	SHP2-R-V
SLC1A5	R	SLC1A5	C	SLC1A5-R-C
Slfn11	G	SLFN11	C	Slfn11-G-C
Smac	M	DIABLO	Q	Smac-M-Q
Smad1	R	SMAD1	V	Smad1-R-V
Smad3	R	SMAD3	V	Smad3-R-V
Smad4	M	SMAD4	V	Smad4-M-V
Snail	M	SNAI1	Q	Snail-M-Q
SOD1	M	SOD1	V	SOD1-M-V
SOD2	R	SOD2	V	SOD2-R-V
Sox2	R	SOX2	V	Sox2-R-V
Src	M	SRC	V	Src-M-V
Src_pY416	R	SRC	V	Src_pY416-R-V
Src_pY527	R	SRC	V	Src_pY527-R-V
Stat3	R	STAT3	C	Stat3-R-C
Stat3_pY705	R	STAT3	C	Stat3_pY705-R-C
Stat5a	R	STAT5A	V	Stat5a-R-V
Stathmin-1	R	STMN1	V	Stathmin-1-R-V
STING	R	TMEM173	V	STING-R-V
Syk	M	SYK	V	Syk-M-V
Tau	M	MAPT	C	Tau-M-C
TAZ	R	WWTR1	V	TAZ-R-V
TFAM	R	TFAM	V	TFAM-R-V
TFRC	R	TFRC	V	TFRC-R-V
TIGAR	R	TIGAR	V	TIGAR-R-V
Transglutaminase	M	TGM2	V	Transglutaminase-M-V
TRAP1	M	TRAP1	V	TRAP1-M-V
TRIM25	R	TRIM25	C	TRIM25-R-C
TRIP13	R	TRIP13	V	TRIP13-R-V
TSC1	R	TSC1	C	TSC1-R-C
TTF1	R	NKX2-1	V	TTF1-R-V
Tuberin	R	TSC2	V	Tuberin-R-V
Tuberin_pT1462	R	TSC2	V	Tuberin_pT1462-R-V
TUFM	R	TUFM	V	TUFM-R-V
Twist	M	TWIST1	C	Twist-M-C
Tyro3	R	TYRO3	V	Tyro3-R-V
U-Histone-H2B	R	HIST1H2BB	C	U-Histone-H2B-R-C
UBAC1	R	UBAC1	V	UBAC1-R-V
UBQLN4	M	UBQLN4	C	UBQLN4-M-C
UGT1A	M	UGT1A1/3-5/7-10	V	UGT1A-M-V
ULK1_pS757	R	ULK1	C	ULK1_pS757-R-C
UQCRC2	M	UQCRC2	C	UQCRC2-M-C
UVRAG	R	UVRAG	C	UVRAG-R-C
VASP	R	VASP	V	VASP-R-V
VAV1	R	VAV1	C	VAV1-R-C
VEGFR-2	R	KDR	V	VEGFR-2-R-V
VEGFR-2_pY1175	R	KDR	C	VEGFR-2_pY1175-R-C
VHL	R	VHL	C	VHL-R-C
VHL-EPPK1	M	EPPK1	C	VHL-EPPK1-M-C
Vinculin	M	VCL	V	Vinculin-M-V
Wee1	R	WEE1	C	Wee1-R-C
Wee1_pS642	R	WEE1	C	Wee1_pS642-R-C
WIPI1	R	WIPI1	C	WIPI1-R-C
WIPI2	R	WIPI2	C	WIPI2-R-C
XBP-1	G	XBP1	C	XBP-1-G-C
XIAP	R	XIAP	C	XIAP-R-C
XPA	M	XPA	V	XPA-M-V
XPF	R	ERCC4	C	XPF-R-C
XRCC1	R	XRCC1	C	XRCC1-R-C
YAP	R	YAP1	C	YAP-R-C
YAP_pS127	R	YAP1	V	YAP_pS127-R-V
YB1_pS102	R	YBX1	V	YB1_pS102-R-V
ZAP-70	R	ZAP70	C	ZAP-70-R-C
ZEB1	R	ZEB1	V	ZEB1-R-V
