# Supplementary material for: TP53/miR-34a-associated signaling targets SERPINE1 expression in human pancreatic cancer
Source: Aging (Albany NY). 2020 Jan 27;12(3):2777–97. doi: 10.18632/aging.102776 (PMC7041729; doi:10.18632/aging.102776)
Supplement: Supplementary Table 2 [file aging-12-102776-s003..xlsx]

## Sheet: Sheet1
Supplemental Table 2
miRNA,Gene,ΔG open,Probability exact,Conservation PhyloP,miRmap score
hsa-miR-34a-5p,LMX1B,0.678552,5.97438863956125,20.5401672395033,0.252583
hsa-miR-34a-5p,CAMK1D,11.8611,14.5123994567991,17.4553031877265,1.17808
hsa-miR-34a-5p,FAM53B,50.8194,12.0479593023769,49.0125213689743,1.29724
hsa-miR-34a-5p,SNX33,79.2244,21.8899279361976,31.1514784120688,1.63729
hsa-miR-34a-5p,DGCR2,9.7831,15.2503087530343,0.0000131269134937713,1.80587
hsa-miR-34a-5p,PPARD,76.0693,27.2956347672723,30.9216786644468,1.95412
hsa-miR-34a-5p,NTSR1,1.2079,22.1019541011681,31.5415183927092,2.11752
hsa-miR-34a-5p,C1orf233,3.87535,21.8104181243336,0.0000131269134937713,2.38774
hsa-miR-34a-5p,DOT1L,38.9794,1.33485248242396,46.6849358297397,2.50194
hsa-miR-34a-5p,TTBK1,30.8188,89.8924874922686,82.6474674180162,2.86557
hsa-miR-34a-5p,POFUT2,67.1073,89.4614414588292,42.2703810756114,2.90349
hsa-miR-34a-5p,FAIM2,8.1528,19.7076136259959,92.5128023505576,3.14842
hsa-miR-34a-5p,ZMIZ1,1.84343,20.5566476816918,51.907832789901,3.36542
hsa-miR-34a-5p,EVC,20.7141,18.9782857511075,38.5389115189585,3.74721
hsa-miR-34a-5p,C17orf51,60.7819,24.5457694134908,2.52829604655434,4.06042
hsa-miR-34a-5p,CAMK2B,15.5673,4.64412117648499,0.79109344170213,4.54316
hsa-miR-34a-5p,RNF24,4.09806,34.3802021962552,79.2650818719031,4.6731
hsa-miR-34a-5p,RAB6B,18.081,25.1105167796993,91.5849658509909,5.17914
hsa-miR-34a-5p,FAM84A,16.2342,6.69406628791722,28.9178290657956,5.23163
hsa-miR-34a-5p,IQSEC1,13.0569,12.7021842505515,2.57295380626015,5.37553
hsa-miR-34a-5p,CBX6,8.00476,2.52707368730199,9.26093245454773,5.66865
hsa-miR-34a-5p,RASD2,38.0893,22.162155715002,14.2131262046404,5.87924
hsa-miR-34a-5p,CENPO,24.8914,27.0056787633211,27.2413384358521,6.32666
hsa-miR-34a-5p,IQSEC2,0.889559,49.2277340385176,34.4697127319378,7.14832
hsa-miR-34a-5p,RHPN1,14.6639,23.0174089776847,30.4641007138809,7.52703
hsa-miR-34a-5p,C19orf44,2.69796,38.8770993308815,40.8096443958515,7.85007
hsa-miR-34a-5p,SLC25A42,6.94059,6.49675555666395,70.0599781804444,8.60267
hsa-miR-34a-5p,FAM109A,4.71917,29.262104644702,95.3038073168628,8.81529
hsa-miR-34a-5p,SYT2,39.595,1.12064223729117,39.3578340172674,8.85844
hsa-miR-34a-5p,GNG7,12.1106,3.3471338285051,44.0636487279955,9.01895
hsa-miR-34a-5p,BTBD7,29.5614,8.28361969309182,8.2721608225429,9.63397
hsa-miR-34a-5p,CTNND1,55.0232,10.6793542619846,89.7372477614346,9.75954
hsa-miR-34a-5p,SCD,1.16215,7.25542910437068,62.3177639825585,10.0687
hsa-miR-34a-5p,FYCO1,47.7247,24.8407441548361,39.8419283330907,10.1617
hsa-miR-34a-5p,CARM1,0.64446,52.7566499432217,9.05485303960902,10.3612
hsa-miR-34a-5p,GFOD1,27.8716,20.9523379493842,51.4191440543549,10.3829
hsa-miR-34a-5p,ABLIM1,0.36065,3.12427245733957,97.8032766613848,11.6342
hsa-miR-34a-5p,CST9,2.65455,45.3684179220352,5.02718780688262,11.7628
hsa-miR-34a-5p,CD68,19.5186,50.9106607431108,0.845346975171887,13.1542
hsa-miR-34a-5p,SORT1,54.8143,4.25399179374476,6.35510637591253,13.3293
hsa-miR-34a-5p,WBSCR17,26.7375,8.95908133560994,39.1801481162157,13.5467
hsa-miR-34a-5p,HTT,28.756,13.5421489520985,44.4598452310645,13.5782
hsa-miR-34a-5p,TCTA,9.5963,12.1206457999751,0.0000131269134937713,13.7048
hsa-miR-34a-5p,POLR2F,0.745959,49.0377965140532,11.8729650822788,13.7637
hsa-miR-34a-5p,SUV39H1,45.3293,7.60748423860874,39.9768336230662,13.8424
hsa-miR-34a-5p,TOLLIP,18.1437,69.6679903844709,51.8272729217897,14.1023
hsa-miR-34a-5p,TSPYL5,29.4554,6.42962994401784,39.4994209062112,14.2844
hsa-miR-34a-5p,IBA57,26.8097,8.39533306990125,17.9371790551694,14.774
hsa-miR-34a-5p,AC093802.1,89.1133,34.9138457825644,42.51354402117,15.3917
hsa-miR-34a-5p,GMPPB,17.2202,11.3922783007609,9.38079430165936,15.6847
hsa-miR-34a-5p,SOD3,12.2948,35.9486660614235,25.3642685677238,15.9078
hsa-miR-34a-5p,KIAA0141,13.1482,6.49823484500079,73.343216148939,16.0065
hsa-miR-34a-5p,XRCC3,4.40552,8.46339582332619,1.87458888147802,16.5109
hsa-miR-34a-5p,C3orf62,27.5029,78.1426938568641,79.4353379399173,16.5502
hsa-miR-34a-5p,CNTN2,13.9723,17.1963861373179,99.9533338225296,16.559
hsa-miR-34a-5p,PGM5,12.6539,28.9435387396185,7.4274833199592,16.6168
hsa-miR-34a-5p,IPO9,45.4972,19.2820045580669,54.6683308092466,16.6668
hsa-miR-34a-5p,ANKRD24,36.8279,30.5612141131233,6.02386184081071,16.6949
hsa-miR-34a-5p,PRKAR2A,33.6484,4.79843186142337,33.3903785237394,17.447
hsa-miR-34a-5p,TMCC1,41.6045,6.59543415718593,21.5437329030156,17.529
hsa-miR-34a-5p,ANO10,46.0437,40.3079661458281,6.9216770892172,17.7475
hsa-miR-34a-5p,AEN,22.1372,14.7302498355357,13.2003454478555,17.7551
hsa-miR-34a-5p,DNASE1L2,0.219121,71.4949037355051,2.35003256130892,18.0157
hsa-miR-34a-5p,KLHL26,31.9453,23.6601403976296,6.62802803436153,18.5187
hsa-miR-34a-5p,CERK,10.2764,9.63645598451131,9.54260976429708,19.315
hsa-miR-34a-5p,FBXL19,46.527,17.5800097493621,83.0117523943818,19.3352
hsa-miR-34a-5p,ZZEF1,29.4029,37.3315295825913,70.4815490072969,19.6319
hsa-miR-34a-5p,SENP1,78.8911,19.6512844947193,57.7022886904946,19.742
hsa-miR-34a-5p,CAMKK1,23.7367,30.5840385253153,0.947855042644748,20.0605
hsa-miR-34a-5p,EFNA3,1.1719,54.4018354328127,2.32511767949774,20.1557
hsa-miR-34a-5p,SRGAP3,49.3145,1.77070813919933,57.0007339257334,20.2559
hsa-miR-34a-5p,GPATCH3,2.24148,48.0136797769822,43.506227473396,20.4946
hsa-miR-34a-5p,CIRBP,16.5107,55.396652966856,0.33954074442989,20.7836
hsa-miR-34a-5p,TP63,88.6597,26.9635384081339,11.7332684688781,20.9052
hsa-miR-34a-5p,CREB3L2,26.6905,2.71567907776673,86.2507657913159,20.9985
hsa-miR-34a-5p,ATP8A2,44.5449,2.28466402418784,87.1102898330611,21.317
hsa-miR-34a-5p,NPBWR1,27.9256,57.8634166108126,41.1756489978849,21.8987
hsa-miR-34a-5p,SESN2,11.202,13.952074465671,0.0000131269134937713,21.9896
hsa-miR-34a-5p,KLHL21,7.61441,3.98931535592684,51.1012889710167,22.2245
hsa-miR-34a-5p,RRP1,38.6243,14.1652081606529,37.2506887363337,22.2967
hsa-miR-34a-5p,PDPR,57.2734,23.4397186904751,0.0000131269134937713,22.3797
hsa-miR-34a-5p,GPR124,20.9217,16.9370847052894,87.0541328971347,22.4115
hsa-miR-34a-5p,INO80D,46.4648,3.34768372102822,63.0887863735287,22.4489
hsa-miR-34a-5p,LPAR3,8.88925,29.9337325294886,18.4732034407741,22.6828
hsa-miR-34a-5p,RAB11FIP4,94.1252,19.5730448571341,99.9382641258388,22.7673
hsa-miR-34a-5p,EMP1,11.8441,24.2071672836564,65.1400241298924,22.811
hsa-miR-34a-5p,ZBTB34,24.3035,7.84822873422331,56.9724979348083,22.8738
hsa-miR-34a-5p,NEURL4,13.579,48.5614656695902,73.1481764682486,23.0945
hsa-miR-34a-5p,FAM195B,4.02313,19.0024577872294,4.35033789331679,23.3653
hsa-miR-34a-5p,GRIA1,59.198,14.1875601299729,75.876526676448,23.8872
hsa-miR-34a-5p,DNAL4,44.8018,84.9289019947467,27.0770682403911,23.9819
hsa-miR-34a-5p,PCDHGC5,31.2672,45.0319301676769,75.8666158567602,24.2919
hsa-miR-34a-5p,PCDHGA5,31.2672,45.0319301676769,75.8667339989816,24.292
hsa-miR-34a-5p,UHRF1BP1,93.2263,4.63780128495167,77.560289616467,24.3842
hsa-miR-34a-5p,BTBD3,13.1171,13.5757466107645,40.5375759867796,24.4083
hsa-miR-34a-5p,COL5A1,7.4711,14.6045490517297,32.5532358695012,24.8658
hsa-miR-34a-5p,NPR3,51.101,12.6096706422605,4.43491459695716,25.2307
hsa-miR-34a-5p,TREML4,46.6005,25.2164369226032,3.66364279463062,25.865
hsa-miR-34a-5p,GTPBP1,8.59781,16.7079731472766,38.5238680760946,26.0299
hsa-miR-34a-5p,PGAP3,23.6195,11.9902360773796,41.0220509830942,26.6946
hsa-miR-34a-5p,STK16,27.6047,19.1367399923821,0.0000131269134937713,27.1274
hsa-miR-34a-5p,HCFC1,16.0054,48.4661406389627,32.4693417653625,27.6124
hsa-miR-34a-5p,KLHL25,13.5882,64.7918842679157,44.2074934460603,27.6749
hsa-miR-34a-5p,TSPAN14,62.7158,7.35166804088164,99.700732626169,27.955
hsa-miR-34a-5p,PDK2,46.3862,24.7915713713251,74.6652013530697,28.1186
hsa-miR-34a-5p,RNF157,9.16678,29.6840968139227,72.6320787373274,28.6454
hsa-miR-34a-5p,APOLD1,10.8678,14.6937323250215,25.9282795328972,28.7635
hsa-miR-34a-5p,NOL6,35.7707,20.9420681256425,63.4787082119477,28.9287
hsa-miR-34a-5p,HMX3,22.7316,17.3371663682015,60.77504972803,29.0769
hsa-miR-34a-5p,ARIH2,19.3833,8.72417654369159,55.3266586478728,29.14
hsa-miR-34a-5p,NAV2,47.8044,10.2386502570476,72.9204376460451,29.2444
hsa-miR-34a-5p,MKI67,16.0764,9.99973357320007,45.470381285642,29.3295
hsa-miR-34a-5p,ASB6,3.56254,23.0300177808909,87.7627236875285,29.443
hsa-miR-34a-5p,ANKRD13A,7.84494,16.8111051027393,2.98576898181227,29.4843
hsa-miR-34a-5p,TAF8,44.7906,16.3365091304619,64.0523280777985,29.6845
hsa-miR-34a-5p,COL1A1,6.21781,37.5899945583875,91.5380896429046,30.1027
hsa-miR-34a-5p,B4GALNT3,16.3955,6.81759073652605,23.5201341255513,30.1046
hsa-miR-34a-5p,CDCA8,33.9036,28.9122413355914,60.3789451133555,30.1454
hsa-miR-34a-5p,TSC1,22.6607,2.97327661747013,48.9934348367544,30.4044
hsa-miR-34a-5p,DCUN1D3,32.8513,32.35443686591,8.32037597580552,31.992
hsa-miR-34a-5p,HIP1,14.3687,22.0184711222005,1.03505712898387,32.0839
hsa-miR-34a-5p,MCL1,48.4102,22.1436762282392,7.84942170038949,32.2354
hsa-miR-34a-5p,HIP1R,28.3475,69.6532207359978,91.8158288786058,32.7192
hsa-miR-34a-5p,LEPROT,81.7896,11.6001609093952,6.04839604213057,32.7394
hsa-miR-34a-5p,MYO10,34.935,25.4568019149271,21.7002319656883,32.8479
hsa-miR-34a-5p,C18orf63,63.6595,31.9135857066359,20.5740740570577,33.4422
hsa-miR-34a-5p,AP4S1,13.9294,19.6909309711396,49.1767653106084,34.0451
hsa-miR-34a-5p,PHB,26.1414,22.3536964472451,86.4580003746421,34.0465
hsa-miR-34a-5p,PKHD1,61.8944,16.0806232280488,24.1697194397906,34.27
hsa-miR-34a-5p,DGKB,54.0603,22.3416607714574,51.5909884789018,34.339
hsa-miR-34a-5p,SERPINB8,37.5578,53.244652450112,77.4799266520582,34.4136
hsa-miR-34a-5p,NCR3LG1,61.8891,20.3613738762636,42.6165509113557,34.8606
hsa-miR-34a-5p,VPS13D,36.2185,11.2842050575552,86.4662834570567,35.1346
hsa-miR-34a-5p,SF3A2,54.9483,61.6524858937078,4.83083543484279,35.217
hsa-miR-34a-5p,PLXNA3,42.1186,21.6028608042341,91.4339538381585,35.2711
hsa-miR-34a-5p,CCDC48,21.1379,18.5843768253915,14.9144578118722,35.4489
hsa-miR-34a-5p,RNF40,23.509,32.5608634211029,60.363035294201,35.717
hsa-miR-34a-5p,CCNT2,22.7511,16.8984140944734,7.93191122478435,35.7899
hsa-miR-34a-5p,PRSS53,22.0081,58.894472836626,86.0285008920394,36.2544
hsa-miR-34a-5p,C3orf72,40.1663,33.0592054564209,10.3598651445923,36.5586
hsa-miR-34a-5p,KRTAP2-1,36.3909,35.095124436031,22.741051809696,36.6399
hsa-miR-34a-5p,AFF2,50.2237,1.34047532709698,91.491922288147,36.657
hsa-miR-34a-5p,USB1,12.3587,32.6991342832894,21.3635922691406,36.7684
hsa-miR-34a-5p,PATZ1,39.6375,40.4262007832638,8.30623828997273,36.8667
hsa-miR-34a-5p,ADAMTS10,9.31786,64.2961522858413,65.2916137269185,36.8863
hsa-miR-34a-5p,ENTPD5,93.8754,6.78660313110352,43.8181623187485,37.1681
hsa-miR-34a-5p,LDHD,27.7945,72.4906971351529,1.4059186890099,37.2127
hsa-miR-34a-5p,FAM134C,15.3165,17.0490071961569,22.5751670038752,37.3927
hsa-miR-34a-5p,UCMA,20.6528,60.6098044752577,10.774609976428,37.9404
hsa-miR-34a-5p,THRB,71.6302,21.0348528077125,98.9379145561325,38.2065
hsa-miR-34a-5p,SGSH,4.10393,48.3283267297179,34.3437599969651,38.2616
hsa-miR-34a-5p,FCRL5,17.8119,6.144708167391,7.80880703003976,38.3013
hsa-miR-34a-5p,MRPS12,30.2771,46.0173530590366,91.7753323504776,38.4429
hsa-miR-34a-5p,SYT6,22.1544,14.3545648127337,94.615261323374,38.4434
hsa-miR-34a-5p,ZNF561,59.8823,17.6976557694491,0.0000131269134937713,38.5173
hsa-miR-34a-5p,OPN4,45.9382,41.927407371379,21.0836739657994,38.8537
hsa-miR-34a-5p,RGS11,5.89372,47.3701506256305,13.7140672074342,38.9323
hsa-miR-34a-5p,JOSD2,34.4732,57.3592658516588,21.1321122765914,38.9385
hsa-miR-34a-5p,CLDN6,81.3578,27.7342786114889,72.8796129450795,39.0769
hsa-miR-34a-5p,GRM2,3.99066,43.119427207164,9.27228723471985,39.1145
hsa-miR-34a-5p,SPRYD4,85.123,21.842683649,81.0539388813533,39.1315
hsa-miR-34a-5p,NFIA,36.443,35.3915165059922,46.4663858469819,39.196
hsa-miR-34a-5p,PTGDR2,29.8606,50.8251485832832,5.2405132780699,39.307
hsa-miR-34a-5p,RPRD1A,45.0267,27.1715526811753,31.5470448232901,39.3362
hsa-miR-34a-5p,GPI,30.2431,11.1361755393245,17.5566429598985,40.0625
hsa-miR-34a-5p,JMY,58.9931,11.7977504593926,13.2839245060703,40.5511
hsa-miR-34a-5p,MTMR2,75.2768,25.8104060421881,54.0172884076096,41.005
hsa-miR-34a-5p,BRPF1,8.3674,47.9859373119426,69.5740854774725,41.0288
hsa-miR-34a-5p,DTD1,0.951847,88.4205491273206,13.8679146335812,41.2016
hsa-miR-34a-5p,ERP44,8.22744,32.17766578214,1.95076436048237,41.7503
hsa-miR-34a-5p,NRSN2,35.1006,49.9022120704662,32.36277748162,41.8503
hsa-miR-34a-5p,DDX41,54.0471,63.5163272384072,9.05561440059166,42.7263
hsa-miR-34a-5p,TBC1D22B,19.5094,25.4749483681901,88.6623635769106,43.0276
hsa-miR-34a-5p,PLSCR3,56.461,24.408427947118,2.92570022566477,43.237
hsa-miR-34a-5p,REG3G,39.6641,80.9249873795793,12.5661580031444,43.9218
hsa-miR-34a-5p,AC002511.4,32.9167,28.4515785555547,43.9754883769713,44.4822
hsa-miR-34a-5p,TMEM41A,74.8845,16.8483738748696,19.0577317717382,44.7264
hsa-miR-34a-5p,ZKSCAN2,50.3801,8.39376084198304,82.3270263327197,44.7265
hsa-miR-34a-5p,ERMP1,43.0053,21.6781263752154,91.2783342786899,44.7454
hsa-miR-34a-5p,CALML3,10.1291,51.9711168564983,27.9883123213017,45.0747
hsa-miR-34a-5p,RBM23,67.068,23.7528476300484,66.0428276054265,45.3985
hsa-miR-34a-5p,ETV3,12.271,17.0171986244322,74.9950938160817,45.679
hsa-miR-34a-5p,ACACA,13.1446,8.54069832013256,5.96763927031689,45.7502
hsa-miR-34a-5p,ZFP90,56.9058,11.7889599239878,80.462413905497,45.828
hsa-miR-34a-5p,SLMO1,12.7399,65.0391422791914,42.4331941836747,45.8976
hsa-miR-34a-5p,AL353791.1,62.7754,17.6596976954237,0.0000131269134937713,46.0292
hsa-miR-34a-5p,KRIT1,61.271,45.8095943698441,11.0389597603656,46.0973
hsa-miR-34a-5p,MFAP4,52.8865,34.9577597347628,1.52990238695857,46.2158
hsa-miR-34a-5p,PLA2G2C,32.5699,5.89740368632458,11.6212433891223,46.3764
hsa-miR-34a-5p,NUP62,73.2367,19.1615161357829,18.5821174420319,46.4208
hsa-miR-34a-5p,TNPO1,81.1538,5.61303180222085,34.5174028086607,46.5384
hsa-miR-34a-5p,ANKRD17,74.3893,43.4528014855463,79.7001077850867,47.0956
hsa-miR-34a-5p,PTAFR,29.0779,34.7293607135405,8.18036431648096,47.1155
hsa-miR-34a-5p,MCCC2,27.9064,19.7326298633153,80.2502042219567,47.3008
hsa-miR-34a-5p,UBASH3A,32.9669,65.6981148909811,47.4885129661744,47.6129
hsa-miR-34a-5p,C10orf55,42.8938,24.708398190962,21.1178301947102,47.8564
hsa-miR-34a-5p,CCDC115,30.8961,44.2988924544987,0.0000131269134937713,48.0968
hsa-miR-34a-5p,GPR107,22.5731,27.0052837701003,56.1452267195174,48.1737
hsa-miR-34a-5p,RAP1GAP2,48.1454,12.6059840388661,71.949019793679,48.2207
hsa-miR-34a-5p,PTPLB,64.6333,18.0315412155289,93.4214735564235,48.2563
hsa-miR-34a-5p,C9orf41,42.6847,42.653048642873,73.5956598223377,48.5446
hsa-miR-34a-5p,DLX3,18.4648,69.7206484022834,64.0902123501415,48.617
hsa-miR-34a-5p,ZNF286A,53.857,16.1884253974755,0.958645365536627,48.7146
hsa-miR-34a-5p,NPTX2,42.5134,35.8706045580359,6.96335503955992,48.9397
hsa-miR-34a-5p,TMEM187,18.0397,63.0552307403242,41.1569300192427,49.779
hsa-miR-34a-5p,IL22RA1,13.416,22.191958340762,61.2755526857206,49.792
hsa-miR-34a-5p,CCDC86,52.7462,58.919938281922,5.55876216881289,49.7993
hsa-miR-34a-5p,SPN,80.715,57.6689870065818,3.1342868810808,50.0274
hsa-miR-34a-5p,ARHGAP42,45.0202,41.7988332055156,34.2592620548057,50.1571
hsa-miR-34a-5p,SNX12,43.19,60.0287771923789,0.0000131269134937713,50.2487
hsa-miR-34a-5p,PGLYRP3,61.3344,73.9492831802438,20.923328717473,50.3967
hsa-miR-34a-5p,DICER1,63.1264,12.8463257962947,97.0294188571,50.4666
hsa-miR-34a-5p,PTCH2,29.8998,64.5181617108442,25.8978250935916,50.4982
hsa-miR-34a-5p,BLOC1S6,35.6387,22.1280778684989,25.4417567380775,50.6736
hsa-miR-34a-5p,HPGDS,34.4627,42.941432418906,5.22561423125447,50.7606
hsa-miR-34a-5p,AP3M1,61.3635,27.3844385372735,96.0318915737949,50.7928
hsa-miR-34a-5p,CDKL2,25.9601,52.8795547946213,84.2911801449658,50.9284
hsa-miR-34a-5p,HLF,42.3298,55.1795073799449,0.109977281250816,51.1543
hsa-miR-34a-5p,CEACAM8,83.8483,40.3535530104912,11.389041416331,51.2873
hsa-miR-34a-5p,DCAF11,11.1853,50.8378116012452,73.2432153219435,51.5037
hsa-miR-34a-5p,MYO1E,27.3324,12.0205808506977,46.6173847329008,51.5365
hsa-miR-34a-5p,MYO1F,38.1305,90.6043427258591,68.3457214203793,51.7278
hsa-miR-34a-5p,MICALL1,43.1527,35.1247721624887,17.6688911971837,52.1688
hsa-miR-34a-5p,RHOT2,5.07438,69.3454668022139,90.0647117454502,52.1714
hsa-miR-34a-5p,MAF1,18.6043,94.6919726689475,34.4691482746576,52.2837
hsa-miR-34a-5p,MYO5B,74.9829,21.1897443650345,36.3146741696604,52.2873
hsa-miR-34a-5p,CDC40,48.4891,41.3141842685198,23.1112438971338,52.3644
hsa-miR-34a-5p,SBK1,19.4593,59.7969084267854,0.0000131269134937713,52.5774
hsa-miR-34a-5p,ZNF398,45.1293,57.7673712984295,76.0481741972925,52.8875
hsa-miR-34a-5p,HAAO,82.9286,75.5961957970553,28.3522559979165,53.007
hsa-miR-34a-5p,NEU1,21.8086,93.0407461065673,2.45895968948024,53.0662
hsa-miR-34a-5p,SERF2,12.8785,65.7909305529115,58.7703600069153,53.2509
hsa-miR-34a-5p,ATXN3,85.0296,23.4275823301409,3.90361590021025,53.2941
hsa-miR-34a-5p,RHOXF2B,67.3194,69.9431225251932,3.1035042689379,53.4132
hsa-miR-34a-5p,CNTN4,47.7613,51.9403383651339,15.1775342852008,53.5946
hsa-miR-34a-5p,TMPRSS6,7.74103,97.5471308234586,91.5102212055574,53.6726
hsa-miR-34a-5p,MRGPRX2,35.998,50.2291193029779,14.2630741104842,54.0186
hsa-miR-34a-5p,AP001652.1,37.8099,54.6117162424465,0.542443446303113,54.0211
hsa-miR-34a-5p,LIX1L,77.7197,13.6384730832257,89.363393265132,54.0489
hsa-miR-34a-5p,ARHGAP32,39.7402,17.0549475843996,91.9242834378914,54.3515
hsa-miR-34a-5p,SREK1IP1,36.4882,21.0618904809267,19.4560023271392,54.4082
hsa-miR-34a-5p,VASH2,61.4145,34.5649041243024,36.4318975071597,54.7429
hsa-miR-34a-5p,FGD4,64.7958,14.5063893638704,35.253205690727,54.8443
hsa-miR-34a-5p,GATC,40.3656,21.1902168079064,53.2461872551585,55.2843
hsa-miR-34a-5p,KBTBD6,23.8793,30.62397931041,10.0164913414222,55.3666
hsa-miR-34a-5p,TLR5,76.408,38.607574544902,87.2259773216817,55.4333
hsa-miR-34a-5p,MARK2,16.4763,39.621266558929,39.7602920580729,55.705
hsa-miR-34a-5p,ATP11C,90.8826,30.3414507280035,90.0891540583756,55.7474
hsa-miR-34a-5p,PARP14,22.1108,56.0365110047435,33.970824384607,55.8964
hsa-miR-34a-5p,POLI,39.5718,30.3455323246188,29.1080905499744,56.2709
hsa-miR-34a-5p,FARP2,32.427,66.4665161148715,9.94991163618182,56.3339
hsa-miR-34a-5p,TAX1BP3,46.7138,52.0705312287062,16.2154268274994,56.3997
hsa-miR-34a-5p,GALNT4,43.7833,26.1016477103482,69.9841440011909,56.4641
hsa-miR-34a-5p,ZNF354C,45.1449,31.5977615192028,41.1740212606116,56.602
hsa-miR-34a-5p,SLAMF1,44.3314,47.7416766021661,12.8966543041771,56.705
hsa-miR-34a-5p,FAT2,0.70717,49.3372013754438,76.2709379192818,56.7341
hsa-miR-34a-5p,RANBP17,42.5652,41.8402068091565,87.4430570901282,56.7347
hsa-miR-34a-5p,AGXT2,30.4602,71.5857986460872,93.7882395194395,56.8131
hsa-miR-34a-5p,HECW1,51.4472,31.66902294322,83.2022239091765,57.3665
hsa-miR-34a-5p,CD14,54.4085,93.932973832706,78.2664256740375,57.4373
hsa-miR-34a-5p,PTPDC1,47.2554,33.9345259237149,68.3891715040437,57.4765
hsa-miR-34a-5p,TMEM39A,34.744,37.2247342586295,34.8165914210107,57.5385
hsa-miR-34a-5p,RABIF,78.898,17.969511789928,84.9898207349313,57.5479
hsa-miR-34a-5p,MFAP2,0.963075,76.258018556007,3.06559374276789,57.5537
hsa-miR-34a-5p,PSME4,39.7265,43.7339359742322,10.3764050555944,57.6208
hsa-miR-34a-5p,NLRP2,59.878,85.3483925402355,4.29294702752202,57.8133
hsa-miR-34a-5p,FOXL2,4.79415,77.1396744047646,91.0582090663128,57.9749
hsa-miR-34a-5p,IGDCC4,58.649,14.3383003859936,37.9648453380489,57.9807
hsa-miR-34a-5p,COL11A2,10.7057,61.2805881588468,12.8689696436187,58.0179
hsa-miR-34a-5p,XPR1,95.7282,75.5349563578961,75.8039348448274,58.145
hsa-miR-34a-5p,NCAPH,32.8831,68.596335051528,58.0766420095099,58.2233
hsa-miR-34a-5p,CBLC,38.0105,83.4730731572366,66.6356915264592,58.2607
hsa-miR-34a-5p,RP11-363G10.2,68.5791,36.6906027395181,21.0805103796474,58.825
hsa-miR-34a-5p,DNAJC9-AS1,49.7886,14.7181831798875,48.7831941902381,58.8777
hsa-miR-34a-5p,HOXD9,32.1763,68.2067400713807,0.0000131269134937713,58.8902
hsa-miR-34a-5p,LYVE1,23.6583,20.6618088180145,30.3922308625025,59.1968
hsa-miR-34a-5p,FAM133A,66.801,33.549229399206,11.6645884574787,59.2868
hsa-miR-34a-5p,RSAD2,42.1079,28.4588200979366,17.3762660415805,59.382
hsa-miR-34a-5p,AL357673.1,72.0755,23.2341363364797,71.1180730426098,59.4187
hsa-miR-34a-5p,KCNK6,46.1356,61.7223532240044,91.9818712073886,59.478
hsa-miR-34a-5p,BMP7,46.1367,17.4369370088046,38.8846350396439,59.51
hsa-miR-34a-5p,GINS4,14.2961,47.2546731957755,74.1985527052797,59.6326
hsa-miR-34a-5p,SUPT3H,88.6228,40.4644918907892,73.056681881197,59.6354
hsa-miR-34a-5p,TMEM178A,97.3093,60.1865421317583,87.31911277292,59.7274
hsa-miR-34a-5p,MED26,23.6613,63.2676441535504,5.9048007354222,59.7488
hsa-miR-34a-5p,PGAM4,6.13654,74.7113490226706,2.8731531909492,59.9517
hsa-miR-34a-5p,UHMK1,65.0753,7.46584431659744,9.17714336571699,59.9711
hsa-miR-34a-5p,FCER1G,41.5874,64.981682383008,49.5945030787207,60.0056
hsa-miR-34a-5p,DR1,58.6358,60.2814954040603,9.7609103356985,60.2947
hsa-miR-34a-5p,PRKD3,26.6645,27.0352258052324,37.2234110100937,60.3933
hsa-miR-34a-5p,FOXP2,63.4866,14.3009309293168,35.5369176720679,60.5052
hsa-miR-34a-5p,TMEM199,58.6411,20.7603015393738,95.7117130267683,60.551
hsa-miR-34a-5p,OVCA2,36.4941,57.3283014811316,80.8205161056071,60.5696
hsa-miR-34a-5p,LIN7A,31.4262,60.9026880760221,60.4247974221892,60.7518
hsa-miR-34a-5p,FUT10,37.2899,33.5996413771353,48.0842123005218,60.7791
hsa-miR-34a-5p,MRTO4,10.6549,63.9548394182168,54.0296539601207,60.9946
hsa-miR-34a-5p,RAB14,85.2109,17.8798947985899,89.6682395771979,60.9987
hsa-miR-34a-5p,ANKRD26,63.3832,67.8378706178794,5.03867385618967,61.4494
hsa-miR-34a-5p,KLHDC7A,15.3041,39.5325712184395,56.0945305796044,61.6105
hsa-miR-34a-5p,RNF208,86.3713,74.2656882400605,18.5575044792311,61.6275
hsa-miR-34a-5p,CTTNBP2NL,51.778,14.5907397789308,93.9993859229868,61.6912
hsa-miR-34a-5p,ARHGAP29,43.1535,54.8238818167891,54.8989181716782,61.8105
hsa-miR-34a-5p,TGFBR1,44.3356,16.3845279141709,59.3151531707338,61.8136
hsa-miR-34a-5p,C1QTNF7,48.8299,21.0213223536577,85.8273440696609,61.984
hsa-miR-34a-5p,FAM207A,18.2753,80.6631765788537,1.20421053626461,62.1555
hsa-miR-34a-5p,KIF11,74.6562,38.2477821905147,67.1078797317437,62.1811
hsa-miR-34a-5p,CYB561D2,19.4635,67.5722415493524,56.9535820524638,62.2423
hsa-miR-34a-5p,DOK6,48.6234,39.9702624319469,93.4423584757921,62.3372
hsa-miR-34a-5p,DESI1,76.3416,36.5493655556927,30.2646110095161,62.6522
hsa-miR-34a-5p,RNF145,48.6505,84.1954615433826,76.2748759933299,62.7207
hsa-miR-34a-5p,GOLGA6L9,29.3645,34.7134448102305,0.0000131269134937713,62.7253
hsa-miR-34a-5p,NMT2,83.3819,49.1163846750685,0.672754316555781,62.873
hsa-miR-34a-5p,MRAS,18.9145,32.6916449020239,86.1677249365544,63.0824
hsa-miR-34a-5p,PRY2,26.3321,78.2712215529368,3.01396559199689,63.2343
hsa-miR-34a-5p,USP24,39.0477,17.5430972456271,99.2232542747466,63.3265
hsa-miR-34a-5p,AS3MT,76.3203,41.0184892454189,34.893856433835,63.6717
hsa-miR-34a-5p,AC012123.1,75.9038,38.728334040965,50.6054985752704,63.7256
hsa-miR-34a-5p,MKX,91.6378,40.8461173018338,59.5725719443466,63.8892
hsa-miR-34a-5p,AL138968.1,85.9522,25.9436581669805,94.0380578101394,63.9488
hsa-miR-34a-5p,KCNK2,59.1033,32.1159151752833,0.0000131269134937713,64.163
hsa-miR-34a-5p,DTNA,81.9944,43.6478197071257,72.4913582246742,64.2872
hsa-miR-34a-5p,PLEKHA5,64.5817,73.8426195206889,46.0472828798663,64.5614
hsa-miR-34a-5p,MARCH8,54.7324,36.4264064895372,99.5536586873848,64.6113
hsa-miR-34a-5p,ZNF709,96.7105,18.4437205139497,1.55599869098419,64.8109
hsa-miR-34a-5p,HAUS5,20.0856,48.2567709970264,35.9782445037285,64.8172
hsa-miR-34a-5p,NLRC5,10.7292,65.6144537778159,78.2874812432815,64.9081
hsa-miR-34a-5p,FZD4,93.8139,30.7713195267455,39.078467044293,64.9347
hsa-miR-34a-5p,TMED4,70.6101,32.5869949333987,86.1968666845105,65.0965
hsa-miR-34a-5p,OLIG2,38.9044,83.8408350807265,92.2057638439383,65.1017
hsa-miR-34a-5p,CEP72,38.2615,68.5067877648759,13.2158614596051,65.2499
hsa-miR-34a-5p,DEPDC1,87.4269,38.6303834671637,7.23438642246582,65.3136
hsa-miR-34a-5p,SMU1,40.4325,37.4535515079679,4.66005429028883,65.4544
hsa-miR-34a-5p,SEMA4D,77.739,48.7010996456369,94.1154934728392,65.5247
hsa-miR-34a-5p,SNX30,83.9877,15.9604058795438,75.7085678182952,65.5901
hsa-miR-34a-5p,RB1,94.0761,48.0918419649162,67.9348359011108,65.651
hsa-miR-34a-5p,ABCF3,15.2141,81.6571576566648,82.0023715081918,65.818
hsa-miR-34a-5p,CD247,24.7818,69.4663811975792,66.5018363895632,65.9794
hsa-miR-34a-5p,RYK,88.2545,67.1652203976978,51.1914971205459,66.2966
hsa-miR-34a-5p,AC022498.1,16.0506,61.6949592823949,18.7761988580373,66.3592
hsa-miR-34a-5p,RTN4,65.1764,61.8673622058404,55.1366334481369,66.7264
hsa-miR-34a-5p,CRB1,10.0742,68.789835259945,73.7497829136681,66.8112
hsa-miR-34a-5p,FAM60A,67.7948,28.4659687007372,0.501750014472422,67.1376
hsa-miR-34a-5p,POLQ,65.5884,58.7001748968022,95.3847347385519,67.141
hsa-miR-34a-5p,PLA2R1,26.7549,52.5743179744996,37.2219276688689,67.4692
hsa-miR-34a-5p,CYS1,10.005,42.9136279941454,78.1325442833145,67.4959
hsa-miR-34a-5p,PPL,10.811,52.3092233085655,59.0953430042806,67.5117
hsa-miR-34a-5p,PLCE1,54.2848,70.2420936685375,85.5555119450318,67.7335
hsa-miR-34a-5p,RBM33,43.3837,43.4718463547625,56.8366475070613,67.7959
hsa-miR-34a-5p,ACSL3,83.0325,40.2839102841829,85.0126221836699,67.9346
hsa-miR-34a-5p,UBE2Q1,21.5996,50.0108584410903,17.5662912413164,68.0415
hsa-miR-34a-5p,TOP2B,63.4072,84.5831435171467,12.9147431909715,68.0718
hsa-miR-34a-5p,WTAP,38.5559,77.5058176305456,63.0709075173502,68.1668
hsa-miR-34a-5p,MAP2K3,22.5123,69.1107169095978,1.23820924221348,68.1916
hsa-miR-34a-5p,ANKRD12,67.5111,49.7424876549129,90.2920698871624,68.2011
hsa-miR-34a-5p,ATP5E,59.5804,31.0456694259912,42.8322917346258,68.2892
hsa-miR-34a-5p,NAGPA,6.23858,61.9060637965168,73.3212285688369,68.3418
hsa-miR-34a-5p,LDLRAD2,24.7962,58.7604617052523,79.4561834785454,68.3528
hsa-miR-34a-5p,MYL3,33.5499,50.7490233211743,2.58579192765705,68.4206
hsa-miR-34a-5p,ATG4B,24.3203,50.8296251731193,99.5886812925862,68.4834
hsa-miR-34a-5p,CENPN,56.1742,57.6696917984072,13.6129374658782,68.5412
hsa-miR-34a-5p,SLC26A2,68.8216,10.2505620133935,21.5110731422431,68.5905
hsa-miR-34a-5p,PRPF38B,50.4499,46.9950232403168,87.2193351034539,68.5977
hsa-miR-34a-5p,FBXW4,10.4476,59.0894058635892,19.047702809829,68.6158
hsa-miR-34a-5p,YWHAG,9.02203,67.6329388409536,83.0531546795412,68.6494
hsa-miR-34a-5p,PLEKHG3,37.0878,37.8430070787432,72.5376568485667,68.6877
hsa-miR-34a-5p,FAM138A,92.7345,34.3802099412204,0.0000131269134937713,69.238
hsa-miR-34a-5p,NCOR1,51.9326,58.686683167573,18.3744365436469,69.2975
hsa-miR-34a-5p,PEX11B,18.5951,67.0794449090563,43.5630801357375,69.4587
hsa-miR-34a-5p,C4orf34,57.081,47.2116731494606,6.31258830310621,69.6208
hsa-miR-34a-5p,NF1,55.9319,19.9192447977457,66.5553548158773,69.7046
hsa-miR-34a-5p,SCUBE3,62.7043,28.4201339971904,63.696050518664,69.7277
hsa-miR-34a-5p,ALAD,43.2221,13.8369687941415,63.8462880436003,69.7856
hsa-miR-34a-5p,RELN,61.8337,57.8601404905692,85.6432653617377,69.8873
hsa-miR-34a-5p,KIAA0528,75.841,69.9953003551686,24.1953300480169,69.939
hsa-miR-34a-5p,ENDOD1,14.1164,59.7688948879668,32.4055187119557,70.0285
hsa-miR-34a-5p,RBM17,57.7846,63.5096665684089,4.0238584278132,70.1287
hsa-miR-34a-5p,ADPRH,33.0147,65.2935101684422,59.6193037563844,70.1708
hsa-miR-34a-5p,MEA1,29.1974,79.6418093043984,44.7797874936482,70.3203
hsa-miR-34a-5p,DCTN5,20.4646,44.0413723644465,8.7189615771304,70.4787
hsa-miR-34a-5p,ZNF436,49.3679,20.774335416161,57.4712025053502,70.5085
hsa-miR-34a-5p,ZNF45,47.2457,80.7635203468753,3.50229990087868,70.7922
hsa-miR-34a-5p,CAPNS1,65.992,47.0805586350397,0.0000131269134937713,70.8363
hsa-miR-34a-5p,BTRC,58.6789,28.9298998560521,88.8717115933093,70.9624
hsa-miR-34a-5p,BACE1,34.4825,31.9125401363455,73.7027229287929,71.1156
hsa-miR-34a-5p,MYC,16.0953,80.3054831100124,90.5343402026034,71.3923
hsa-miR-34a-5p,ABCB1,69.839,95.5404723220505,77.9317812683408,71.4069
hsa-miR-34a-5p,BCL10,74.1351,46.8114443322113,59.5455305025494,71.9414
hsa-miR-34a-5p,AK7,77.0833,58.9513053906351,30.0165648521378,72.0253
hsa-miR-34a-5p,RNF111,58.2994,31.2557438597529,12.9973902383283,72.0479
hsa-miR-34a-5p,FAM105B,51.5041,31.6542068249562,22.8202858595444,72.0989
hsa-miR-34a-5p,KIAA1024,39.8406,63.5850328239367,96.9934248603001,72.1147
hsa-miR-34a-5p,C5orf62,12.3804,72.3849009116908,8.59944102976961,72.344
hsa-miR-34a-5p,CACNA2D1,64.9469,23.047157388689,87.1466645103524,72.4356
hsa-miR-34a-5p,GM2A,29.1212,46.2868468651557,76.3603847078284,72.5955
hsa-miR-34a-5p,MANEA,78.7643,46.5061378074035,1.51122278905693,72.7872
hsa-miR-34a-5p,LUZP1,63.1871,50.8993453490787,44.282776294947,72.8889
hsa-miR-34a-5p,MPHOSPH6,74.2997,75.9869757568651,67.2610576853025,72.9483
hsa-miR-34a-5p,PGRMC2,35.0418,41.0957994871904,88.8409421080799,73.1133
hsa-miR-34a-5p,FBXL8,13.8264,80.2792664031003,51.6741080951444,73.1145
hsa-miR-34a-5p,ZNF182,62.4959,51.3088526345351,25.6626039306967,73.2937
hsa-miR-34a-5p,KCTD16,98.6457,86.8798122372617,95.0006675035512,73.3772
hsa-miR-34a-5p,IRAK4,92.1886,25.5291708689557,36.9981137938001,73.4604
hsa-miR-34a-5p,UTY,37.9853,61.5326790283539,0.789505085169384,73.5432
hsa-miR-34a-5p,SLC8A3,85.8113,81.4104960077028,99.5812514595487,73.5485
hsa-miR-34a-5p,TMF1,90.703,40.4398861366209,59.7504022414467,73.7102
hsa-miR-34a-5p,GPIHBP1,9.215,44.122617048496,55.4025978424342,73.7387
hsa-miR-34a-5p,PRICKLE2,54.6679,45.519034258614,10.9160262154964,73.74
hsa-miR-34a-5p,GPR17,22.1813,50.2948585668686,64.6303323327562,73.8409
hsa-miR-34a-5p,FNDC3B,83.0475,50.4924790967264,8.53059036849478,73.8413
hsa-miR-34a-5p,MYLK,83.4673,37.7152693691122,45.0898189365441,73.8951
hsa-miR-34a-5p,SIRPA,77.2053,68.274554985922,81.0031508530459,74.2865
hsa-miR-34a-5p,CDC14B,82.1378,36.7967474864103,9.33563771924079,74.3247
hsa-miR-34a-5p,C19orf40,15.4393,58.1947849432302,95.6729361243077,74.4314
hsa-miR-34a-5p,SPCS2,77.9753,33.2692101854966,98.2460737073567,74.4374
hsa-miR-34a-5p,MS4A10,48.4003,66.3384531167056,1.96120025670992,74.637
hsa-miR-34a-5p,KIR3DL2,36.8433,64.9384267528444,22.1336957761662,74.6823
hsa-miR-34a-5p,ANP32B,88.4224,62.1306522949029,3.41404766146005,74.7348
hsa-miR-34a-5p,NGB,8.98312,81.4897967055087,18.8593316011933,74.762
hsa-miR-34a-5p,PEX7,61.351,90.3159744397563,11.9666649907974,74.7931
hsa-miR-34a-5p,TNFRSF11B,47.0693,75.2401210259229,40.1750237629952,74.9977
hsa-miR-34a-5p,DSTYK,36.1829,45.3387469606821,23.6190322918134,75.083
hsa-miR-34a-5p,O3FAR1,14.4418,64.959733151874,30.9345955473247,75.1111
hsa-miR-34a-5p,SNAPC2,21.2914,72.4577965233471,14.4518653803517,75.2394
hsa-miR-34a-5p,ABL2,61.9861,26.2678778965976,20.973919842078,75.4097
hsa-miR-34a-5p,CXCL2,52.8068,81.5626535923394,4.79073271411932,75.5019
hsa-miR-34a-5p,ZDBF2,28.2527,38.3755586249713,36.2311213652725,75.7553
hsa-miR-34a-5p,EI24,21.6495,79.0757530390856,13.0057258283968,75.8521
hsa-miR-34a-5p,STBD1,83.9186,34.2840407093954,26.2104425384458,75.9759
hsa-miR-34a-5p,DNAJB2,41.1173,46.1132512170825,5.14487058635428,76.1
hsa-miR-34a-5p,DLG3,39.5018,42.8674215322732,7.87243317974407,76.2172
hsa-miR-34a-5p,KIAA2018,99.0143,47.2451623786151,26.6340349099763,76.2447
hsa-miR-34a-5p,ZC3H6,82.7706,43.1190399589083,23.1288602150425,76.3173
hsa-miR-34a-5p,XXbac-BPG32J3.22,87.8385,37.0140557175888,33.9165445973103,76.3181
hsa-miR-34a-5p,SDHC,15.3032,91.2730042890068,69.2050091776816,76.492
hsa-miR-34a-5p,UNC119,0.514159,75.39367270428,73.6583670880975,76.5474
hsa-miR-34a-5p,AMOTL1,31.4982,26.3868947755099,20.1872501702233,76.5495
hsa-miR-34a-5p,TCF12,47.9953,72.6534963018566,57.44636638502,76.6528
hsa-miR-34a-5p,ZNF80,87.1524,53.8134891579008,78.0667653197972,76.7849
hsa-miR-34a-5p,EPHA10,33.5967,41.134044124925,41.680155664191,76.8197
hsa-miR-34a-5p,HABP2,65.1777,63.9056046749849,20.6634158302963,77.1526
hsa-miR-34a-5p,WDPCP,99.2861,67.2215805088349,4.47144679721032,77.1629
hsa-miR-34a-5p,CORO6,42.4277,60.3141714118777,55.1041180834129,77.2141
hsa-miR-34a-5p,AL355390.1,64.9999,49.0615270871635,59.6936939751536,77.2739
hsa-miR-34a-5p,SV2A,76.9726,49.0347682326935,86.442418728325,77.4204
hsa-miR-34a-5p,RGMB,52.6161,67.9282388708337,41.6646790331818,77.6071
hsa-miR-34a-5p,DPY19L3,84.812,63.6453815921077,77.4157491719871,77.8658
hsa-miR-34a-5p,POU4F1,59.6016,78.6779871207426,85.0035121057053,77.9651
hsa-miR-34a-5p,CTSC,62.7081,92.3511731376108,62.1254415729613,78.2124
hsa-miR-34a-5p,MOB4,20.1049,77.4178735516722,8.5539300206867,78.2566
hsa-miR-34a-5p,STOX2,40.2428,34.2288500879906,96.4476996856235,78.5609
hsa-miR-34a-5p,VCPIP1,53.5629,44.6299974581025,11.6467358551272,78.6793
hsa-miR-34a-5p,SPRED1,64.4622,65.0419846813884,91.8100399097551,78.7175
hsa-miR-34a-5p,ZNF513,17.388,95.6544317387431,21.5706168218508,78.9437
hsa-miR-34a-5p,KRI1,21.5065,57.8766837360534,1.94900535407421,79.0805
hsa-miR-34a-5p,TKT,21.2504,94.6093958508983,37.0504114171593,79.2416
hsa-miR-34a-5p,CBL,72.0079,13.4727695546041,73.0436337291842,79.4073
hsa-miR-34a-5p,C6orf228,45.4767,66.2460556828914,5.10441343896648,79.4187
hsa-miR-34a-5p,PPP1R3B,56.8786,32.8731016896881,72.5898363297045,79.5072
hsa-miR-34a-5p,WFDC5,57.1827,67.4909116706866,6.59431812050953,79.6532
hsa-miR-34a-5p,DIS3,67.2413,51.4019626051398,34.1855675624516,79.6763
hsa-miR-34a-5p,SMARCC1,32.1477,65.9873428682115,10.4508084012771,79.8954
hsa-miR-34a-5p,SYT11,67.7822,45.2742391462446,76.6398960768513,79.9102
hsa-miR-34a-5p,AC022532.1,45.835,87.5443302440733,54.8754735041784,79.9296
hsa-miR-34a-5p,TBC1D12,69.7186,83.5600723503661,95.3549366449211,80.057
hsa-miR-34a-5p,CLUAP1,16.693,58.5375151394705,7.95967464682367,80.1032
hsa-miR-34a-5p,SLC5A3,36.6107,46.508817565333,93.7699537289426,80.14
hsa-miR-34a-5p,RAB3C,79.4454,19.8778634491397,99.2284919132306,80.2096
hsa-miR-34a-5p,NFAT5,75.9664,23.2606550970312,51.4847129872563,80.3193
hsa-miR-34a-5p,C1orf95,31.9988,48.5638046490547,20.7349312550104,80.3383
hsa-miR-34a-5p,SYT9,38.0613,45.0543673316132,86.4100608865629,80.4232
hsa-miR-34a-5p,LYPLAL1,69.3734,73.6288275036723,72.2703797629201,80.5701
hsa-miR-34a-5p,BBS1,46.0072,60.3575664514134,79.1437891912207,80.5721
hsa-miR-34a-5p,APBA1,45.8159,72.8109127178058,68.6083909593897,80.7108
hsa-miR-34a-5p,AC127496.1,52.2882,79.7911089969077,0.0000131269134937713,80.8054
hsa-miR-34a-5p,ERC2,40.6013,64.7971973139841,85.1738600621139,80.9308
hsa-miR-34a-5p,EGR2,5.23956,80.8960831697726,21.7191215942059,80.999
hsa-miR-34a-5p,GBP4,82.4978,47.7436902930958,3.13864501636073,81.0499
hsa-miR-34a-5p,NTNG2,48.2568,80.3589078793712,85.3018343417647,81.09
hsa-miR-34a-5p,GLT25D2,50.2331,50.0655998545186,54.715981505229,81.1391
hsa-miR-34a-5p,SLC29A1,89.0616,88.422206549855,98.2099353145084,81.1737
hsa-miR-34a-5p,DDX19A,43.663,66.115041853017,55.4459691646177,81.2969
hsa-miR-34a-5p,C9orf35,62.555,47.6691682387655,0.0000131269134937713,81.3734
hsa-miR-34a-5p,ATG2A,43.8487,89.7857154032021,95.378276297113,81.5298
hsa-miR-34a-5p,IL7R,64.2005,61.2561295590156,6.96591478769121,81.6394
hsa-miR-34a-5p,BMF,13.9838,68.480787916987,91.1613734794604,81.6664
hsa-miR-34a-5p,YDJC,23.7402,78.6051147439817,30.8937183387051,81.7736
hsa-miR-34a-5p,PODNL1,15.4297,89.6215918474638,20.2008365256893,81.7888
hsa-miR-34a-5p,ANXA11,53.7978,27.6424000903373,9.34640178830568,81.7945
hsa-miR-34a-5p,TRAPPC6A,1.83247,88.806968671771,6.34523493696522,81.9042
hsa-miR-34a-5p,SEMA3G,71.0581,82.7478268789634,39.1857270544506,82.1418
hsa-miR-34a-5p,MAGT1,69.5271,63.7252786522274,86.8633857171568,82.15
hsa-miR-34a-5p,TMEM133,57.1681,92.2723139028165,29.5088289651122,82.2001
hsa-miR-34a-5p,SLC35G2,81.2483,95.5482637569556,73.204097119732,82.2077
hsa-miR-34a-5p,THBD,44.4207,57.3012018481965,34.9263192909051,82.3365
hsa-miR-34a-5p,RBP2,18.7762,86.5716478203267,16.9833906476255,82.421
hsa-miR-34a-5p,C3orf70,62.7476,61.1279039165824,88.5070984441063,82.5095
hsa-miR-34a-5p,GXYLT1,35.4596,66.5504405568506,31.1923031130344,82.6202
hsa-miR-34a-5p,BRPF3,60.0587,39.6781765625893,97.4432579319047,82.6403
hsa-miR-34a-5p,ZNF333,67.3368,70.9179038344858,11.9291351451187,82.7613
hsa-miR-34a-5p,HNRNPUL2,36.2576,90.5103498292313,92.5651918623113,82.8186
hsa-miR-34a-5p,PDE4B,92.3102,60.0901947657357,91.9358876294199,82.8481
hsa-miR-34a-5p,CDH11,30.0385,67.4322822847709,31.5069027218261,82.8845
hsa-miR-34a-5p,TIMM22,11.5863,62.0419492094482,16.8539198998364,83.004
hsa-miR-34a-5p,DUSP22,9.65568,93.0808495359294,9.77584876325441,83.0836
hsa-miR-34a-5p,EDEM3,63.6576,73.4059428976114,88.1458064040173,83.0941
hsa-miR-34a-5p,YKT6,80.8536,82.6528271368707,69.8740223238916,83.0961
hsa-miR-34a-5p,MCMDC2,82.176,63.5896488231448,37.0181979714456,83.1616
hsa-miR-34a-5p,NMUR2,63.8015,94.3039189368579,49.2364533862646,83.2227
hsa-miR-34a-5p,CCR1,68.3358,80.5166031140646,0.0000131269134937713,83.2561
hsa-miR-34a-5p,TGFB3,59.555,88.3164025814279,81.7586309784394,83.3579
hsa-miR-34a-5p,CD274,91.5701,71.8702247449467,39.2224824122331,83.4192
hsa-miR-34a-5p,LMBR1L,17.4638,78.3923837871857,92.3767681460217,83.5272
hsa-miR-34a-5p,PRKACB,68.6387,79.0293916779111,93.8638505411636,83.609
hsa-miR-34a-5p,ZNF248,44.1062,70.751441299283,1.09169976070949,83.6446
hsa-miR-34a-5p,CLDN1,72.2361,70.0129278957689,2.82580441397717,83.9174
hsa-miR-34a-5p,ANHX,11.5641,86.1127276574408,11.4473642929838,83.9747
hsa-miR-34a-5p,AL121758.1,21.3363,80.9743073174275,38.2060917542374,83.9897
hsa-miR-34a-5p,ASB5,51.5078,93.2820250047748,11.7628171511526,84.1765
hsa-miR-34a-5p,PGM1,28.139,81.340140744604,89.5166237263448,84.2804
hsa-miR-34a-5p,VAT1,18.233,60.6018426511201,96.5496432958162,84.35
hsa-miR-34a-5p,P4HA3,55.9454,88.1151341730011,1.07007973418525,84.446
hsa-miR-34a-5p,ZNF358,56.648,98.2930639035523,63.0215109418731,84.5427
hsa-miR-34a-5p,CASKIN2,47.9124,95.2947555588325,96.9721986411807,84.5703
hsa-miR-34a-5p,CDK19,82.5127,30.4829202607823,0.885541584289815,84.8167
hsa-miR-34a-5p,MLANA,51.3505,75.1909172625514,12.1796885429743,84.8668
hsa-miR-34a-5p,P4HA2,41.3353,80.3776429499829,53.7135053755367,84.8908
hsa-miR-34a-5p,ZC3H12B,45.2139,45.3005178128776,73.4528652573525,84.9734
hsa-miR-34a-5p,ZNF189,67.4966,96.7202008981991,33.4593867079762,85.2682
hsa-miR-34a-5p,NAMPTL,70.3315,97.276173218933,0.551382874392372,85.3904
hsa-miR-34a-5p,AMOTL2,60.7172,55.9299093049095,95.3620908127752,85.7315
hsa-miR-34a-5p,SPECC1L,30.8437,75.5677717750856,75.7938271214372,85.7345
hsa-miR-34a-5p,SCNN1G,78.0829,96.1507678280965,62.0911803287425,85.8134
hsa-miR-34a-5p,ZBTB9,23.3167,73.9417937989782,1.34175433585234,85.8467
hsa-miR-34a-5p,ZNF502,6.46835,79.7562798887885,0.0000131269134937713,86.0373
hsa-miR-34a-5p,CCDC28B,27.3244,94.2331222107476,0.0000131269134937713,86.0862
hsa-miR-34a-5p,PPP1R18,84.2863,70.7265257465101,56.5803576480089,86.1166
hsa-miR-34a-5p,PAFAH1B2,69.8838,61.9499390238897,51.4961990365633,86.1251
hsa-miR-34a-5p,KIAA1462,77.5692,43.45373088136,83.8330508640331,86.1532
hsa-miR-34a-5p,DNAJB1,48.9892,80.2055188452815,79.5418365890923,86.1976
hsa-miR-34a-5p,MEGF9,48.1338,55.8759036631671,51.8334556980453,86.2326
hsa-miR-34a-5p,C9orf152,98.1702,86.8939080737699,83.7589231835338,86.5564
hsa-miR-34a-5p,ECHDC3,27.0018,80.3769226682272,23.4855184546682,86.6583
hsa-miR-34a-5p,PAX6,86.4102,60.3905832376959,33.1600143188372,86.6728
hsa-miR-34a-5p,NSUN7,29.3509,89.144594936001,0.746356920515357,86.7675
hsa-miR-34a-5p,WDR77,35.0486,83.4683022587261,15.2613233740316,86.8904
hsa-miR-34a-5p,GAB1,57.6206,58.5644908529638,95.8799344231909,87.0453
hsa-miR-34a-5p,KLHDC3,63.0445,81.1166907560898,74.6892498585903,87.1478
hsa-miR-34a-5p,RAB7L1,60.2884,71.9446616046607,31.2461759660128,87.1995
hsa-miR-34a-5p,SYT4,38.244,83.4006422434871,59.0452244485613,87.3646
hsa-miR-34a-5p,LTF,30.5757,87.5926820612822,11.5402897136062,87.4647
hsa-miR-34a-5p,RNF169,84.579,68.8011971237678,87.4762419274405,87.7917
hsa-miR-34a-5p,ZFHX4,41.3541,74.5979937132569,30.2611586312672,87.7965
hsa-miR-34a-5p,FAM22D,49.79,78.9452271420134,0.0000131269134937713,87.8251
hsa-miR-34a-5p,ARPP19,97.4256,51.8498539377029,93.1679140953778,87.8628
hsa-miR-34a-5p,CHST11,77.0866,68.8421989690832,23.4540663699372,88.0159
hsa-miR-34a-5p,DSEL,64.1341,83.3171282846591,85.8999359012814,88.0505
hsa-miR-34a-5p,MAN2A2,94.8884,76.2590021665765,74.7385676725864,88.1025
hsa-miR-34a-5p,JARID2,65.2979,98.2374782889265,33.9815228191044,88.105
hsa-miR-34a-5p,AXL,39.2526,76.7927154575718,97.3222015356651,88.3373
hsa-miR-34a-5p,SLC7A10,31.9777,98.1059532913546,74.0584622844741,88.4364
hsa-miR-34a-5p,METTL16,26.6299,66.9502511459838,70.8024626614791,88.6759
hsa-miR-34a-5p,PTPRB,53.1626,51.7763154939421,19.4463277918943,88.6842
hsa-miR-34a-5p,SVIP,90.3161,62.7468029945753,89.0561578548103,88.7825
hsa-miR-34a-5p,PTPRM,34.0114,87.1034171250782,94.5145385161363,88.9176
hsa-miR-34a-5p,SULT4A1,20.2041,71.7007261834191,1.06031331054589,88.9283
hsa-miR-34a-5p,CALCB,32.1293,92.6481848047812,94.4500328632279,89.1155
hsa-miR-34a-5p,SLC3A1,37.6543,93.3291531174956,64.8661967144123,89.1831
hsa-miR-34a-5p,MTUS1,53.8413,73.1155841554743,97.0225534813428,89.3775
hsa-miR-34a-5p,DOCK3,65.3813,92.8931580513482,94.9083459209495,89.4471
hsa-miR-34a-5p,CTNNBIP1,19.109,78.4271741704794,86.4639074857143,89.6728
hsa-miR-34a-5p,ZMYM4,54.0278,79.2401166887424,93.3972544010275,89.685
hsa-miR-34a-5p,CPEB3,43.5017,80.1717740322782,73.2996610499667,89.7242
hsa-miR-34a-5p,FUT1,42.63,56.3865524480518,81.8397815576579,89.8632
hsa-miR-34a-5p,IFI35,40.8203,84.930884705816,10.3273366529547,90.1407
hsa-miR-34a-5p,LIMA1,32.0661,88.4406318218621,99.3942585768299,90.1501
hsa-miR-34a-5p,HPSE,69.1539,57.3871554710356,6.15511784883493,90.2798
hsa-miR-34a-5p,MS4A14,85.6441,83.1471882601199,33.0900872506559,90.5089
hsa-miR-34a-5p,NOTCH2,58.4447,51.5220405442728,99.0843190223285,90.701
hsa-miR-34a-5p,E2F3,67.205,59.8534621620504,3.62393388131196,90.7449
hsa-miR-34a-5p,PLAGL1,52.1808,94.7980089863281,76.5694176783032,90.7928
hsa-miR-34a-5p,KLRD1,87.119,84.5539449986655,28.1156827629317,90.8594
hsa-miR-34a-5p,FRMD4A,91.5424,55.4241708279073,98.9018024171111,91.1802
hsa-miR-34a-5p,RNF152,76.2553,40.1892203406948,99.5855045795207,91.1915
hsa-miR-34a-5p,RCAN1,52.4672,79.2189884239104,84.5605050291175,91.6421
hsa-miR-34a-5p,ANGPTL7,43.8721,96.0701659761514,98.9204951419262,91.9213
hsa-miR-34a-5p,SNTB2,53.5772,33.2355660570398,96.8739830744203,92.0067
hsa-miR-34a-5p,DPYD,46.9808,93.5640191845884,1.45458015733131,92.494
hsa-miR-34a-5p,CYBRD1,78.1083,62.5286505621993,54.1780537171678,92.7263
hsa-miR-34a-5p,GYPE,62.9539,76.2016739348001,10.0809313597631,92.8483
hsa-miR-34a-5p,KRT5,70.6197,87.3147462431885,84.9510307055572,92.852
hsa-miR-34a-5p,SDHAF2,61.0633,61.9304294567666,26.8694004689196,93.1771
hsa-miR-34a-5p,ACSM2A,80.5125,96.5580987783557,0.0000131269134937713,93.2412
hsa-miR-34a-5p,OLIG3,41.1131,81.8166497232647,51.4105590529299,93.3343
hsa-miR-34a-5p,SOX4,70.4567,80.4232065797506,88.7108543953566,93.5229
hsa-miR-34a-5p,SAMD4A,75.8023,81.7695525904043,60.924854064821,93.5982
hsa-miR-34a-5p,PRLR,90.4246,67.0991635902374,93.5290223586779,93.6014
hsa-miR-34a-5p,CDRT1,56.9298,90.0370705010233,0.0000131269134937713,93.7798
hsa-miR-34a-5p,ZBTB10,68.0982,86.3070333422297,84.70580683458,93.829
hsa-miR-34a-5p,PTPRG,82.9699,93.0061416024364,96.1265497469984,93.9166
hsa-miR-34a-5p,WISP3,57.2886,90.4038952837345,12.8356272833446,93.924
hsa-miR-34a-5p,CCNE2,51.4493,85.2830095447401,96.0552968605542,94.0834
hsa-miR-34a-5p,RRAGD,72.4219,83.915976732266,95.3946061774992,94.2489
hsa-miR-34a-5p,P2RY14,97.9869,91.7198655412096,17.3093975442433,94.2549
hsa-miR-34a-5p,AREGB,72.1082,99.0195881010693,95.4786315507729,94.2559
hsa-miR-34a-5p,MYOCD,90.1896,50.9483012735666,92.4643902935926,94.3946
hsa-miR-34a-5p,ZNF395,44.9047,96.1997237525843,54.9588950394313,94.4245
hsa-miR-34a-5p,PLAG1,85.8681,62.6045512203199,86.5576861557138,94.4291
hsa-miR-34a-5p,GABRB2,90.7554,56.8527141533196,35.5635653064603,94.548
hsa-miR-34a-5p,GPR55,94.9551,88.2783980376117,65.3103458324741,94.5771
hsa-miR-34a-5p,COG3,73.2761,84.0826406365618,66.7283281549847,94.7584
hsa-miR-34a-5p,AC073346.2,70.146,97.3996976675418,99.1526708608906,94.9602
hsa-miR-34a-5p,SERPINB2,57.2321,93.4751611998314,2.76049801934566,95.0275
hsa-miR-34a-5p,NOL10,73.3478,90.7830500509077,79.7910247879446,95.1257
hsa-miR-34a-5p,REXO1L1,63.6138,73.4131999299236,0.0000131269134937713,95.1349
hsa-miR-34a-5p,GK5,89.781,88.2944146254682,88.3913059401778,95.1503
hsa-miR-34a-5p,ECI1,50.2269,99.2030508346981,26.6825519822493,95.2234
hsa-miR-34a-5p,PNPLA8,95.5646,95.475894802927,28.4561030105657,95.3208
hsa-miR-34a-5p,PDE8B,67.7855,89.8735897773896,42.1904906800883,95.5468
hsa-miR-34a-5p,PGAP1,74.8348,84.9272523171774,98.2640575788432,95.5998
hsa-miR-34a-5p,SWAP70,45.8044,97.3364987522087,10.4054811689832,95.7351
hsa-miR-34a-5p,CELSR3,74.2312,95.9096593191215,89.0391191210954,95.8418
hsa-miR-34a-5p,HSPA5,79.0681,96.888770063913,0.0000131269134937713,95.9532
hsa-miR-34a-5p,NUP210,20.8944,94.6040518249694,62.0010640676078,96.0777
hsa-miR-34a-5p,KIAA1244,81.3334,88.2130537669419,88.2594854748733,96.2059
hsa-miR-34a-5p,SGSM2,18.985,73.1432956406534,99.3544446482033,96.2926
hsa-miR-34a-5p,G3BP1,85.7037,62.6525390241685,86.5576467749733,96.4369
hsa-miR-34a-5p,AC016757.1,32.3357,91.2879598166426,52.9819424865288,96.5291
hsa-miR-34a-5p,TRAFD1,18.58,98.7536492339378,90.322288042025,96.6362
hsa-miR-34a-5p,EFNB1,59.2141,87.4873660256572,77.9116708368683,96.6573
hsa-miR-34a-5p,TMCC3,86.9368,74.9132447732716,99.6788763152019,96.6717
hsa-miR-34a-5p,PKNOX1,53.5371,92.1114819572518,67.3218221678651,96.8239
hsa-miR-34a-5p,ATXN1L,89.4556,74.8345017129539,21.1790016115912,96.9419
hsa-miR-34a-5p,CALN1,73.9595,65.2501615986971,71.5413241143895,97.0231
hsa-miR-34a-5p,GNAQ,95.2108,79.5834122674361,79.5015763454069,97.0575
hsa-miR-34a-5p,EIF4EBP2,38.1551,78.1171896867425,66.2013875935178,97.3337
hsa-miR-34a-5p,TMOD2,60.8483,82.2120379373175,45.2689225442531,97.3459
hsa-miR-34a-5p,POU6F1,46.6195,78.7857970351344,48.6238728411642,97.656
hsa-miR-34a-5p,FAM120AOS,84.2099,99.18692581733,26.0090625585378,97.7359
hsa-miR-34a-5p,JPH1,81.9455,98.7644534602723,70.2405257486377,98.1176
hsa-miR-34a-5p,MBLAC1,43.6276,99.7415660040643,5.92357222171829,98.2859
hsa-miR-34a-5p,DNAJC16,50.906,91.6926497337978,99.8465595081713,98.2965
hsa-miR-34a-5p,TPD52L3,68.3577,98.2984389093416,5.05114442400876,98.4629
hsa-miR-34a-5p,ALG6,65.2101,99.6944533812736,51.9638453297789,98.4946
hsa-miR-34a-5p,FOXJ2,45.4277,98.3223243817543,0.0000131269134937713,98.5274
hsa-miR-34a-5p,CAPN6,94.6318,93.768873511863,92.0819376689516,98.5388
hsa-miR-34a-5p,STK35,37.3992,89.8272516511104,84.0875029551964,98.5956
hsa-miR-34a-5p,NOTCH1,95.3479,97.4105870884926,99.8695447336989,98.7029
hsa-miR-34a-5p,EMC1,78.0502,95.4795349365308,60.8276755242266,98.7172
hsa-miR-34a-5p,SARM1,46.5129,85.3916791502596,53.611666780652,98.8439
hsa-miR-34a-5p,LRRC55,62.7969,96.0137361603282,93.9884905847869,98.9519
hsa-miR-34a-5p,CCL22,77.1801,97.5923769096567,81.0189031492384,98.9661
hsa-miR-34a-5p,ELMOD1,78.1511,98.7669318491089,89.7880751704825,99.2046
hsa-miR-34a-5p,JAZF1,93.9163,99.6889079862518,76.7602173659352,99.2853
hsa-miR-34a-5p,TMED8,74.9235,96.1327065694498,99.7532402801441,99.3981
hsa-miR-34a-5p,FAM167A,69.2888,99.6344608814979,87.3063271591771,99.6217
hsa-miR-34a-5p,HCN3,79.7204,99.9791737888075,97.9252781953959,99.861
hsa-miR-34a-5p,SDK2,92.2493,99.3335070270843,98.6413775803082,99.875
hsa-miR-34a-5p,MDM4,74.2832,99.1129536555228,99.2594583021624,99.8767
hsa-miR-34a-5p,DDA1,71.6687,10.1978807606857,40.3588136788214,0.651269
hsa-miR-34a-5p,TMEM63C,98.3082,14.5237535756568,32.6766026025156,1.08574
hsa-miR-34a-5p,CENPP,6.79491,8.67741244433113,15.4677572156346,1.09063
hsa-miR-34a-5p,DNAJC5,3.82542,15.687883792065,11.2668429786174,1.13548
hsa-miR-34a-5p,C10orf91,2.20434,32.2849722737994,6.32168525415739,2.00209
hsa-miR-34a-5p,SMPD3,57.6333,17.0841848277063,81.2713205688102,2.03609
hsa-miR-34a-5p,MBD3,19.9331,24.9755220377561,30.9833226502136,2.4606
hsa-miR-34a-5p,CACNA1I,25.5409,22.9254065370913,6.65979516501646,2.90428
hsa-miR-34a-5p,FAM78A,3.29108,31.4173657917593,32.5621359168499,3.23299
hsa-miR-34a-5p,TRAF3,6.42416,0.373198889000244,98.1082017349316,3.32783
hsa-miR-34a-5p,MLC1,0.759694,24.8842088990579,24.0831080645587,3.9101
hsa-miR-34a-5p,IGFBP5,8.97268,3.75382969162492,39.5562998223797,4.40149
hsa-miR-34a-5p,PACSIN1,99.3747,19.4967646957228,33.7821643838745,4.9284
hsa-miR-34a-5p,CRHR1,25.9685,28.1915490968054,68.4920077443539,6.16247
hsa-miR-34a-5p,DRAXIN,19.827,5.43825117448523,52.3359145658464,6.32441
hsa-miR-34a-5p,PQLC1,14.986,35.0098756050173,7.06957802355152,7.23508
hsa-miR-34a-5p,HIVEP3,21.8745,1.08893435011301,51.774003906832,7.36061
hsa-miR-34a-5p,SEPT9,27.0483,8.34764731969218,26.2388229254193,7.36773
hsa-miR-34a-5p,P2RX6,35.2952,5.50921054486294,11.0134804212742,7.53207
hsa-miR-34a-5p,SNAI3,0.121672,60.1346663554223,34.7975180157043,7.88556
hsa-miR-34a-5p,DOK4,1.13181,11.4223520002999,27.2648224840925,8.17924
hsa-miR-34a-5p,KPNA6,3.56745,1.86721814948929,72.4103389145907,8.33704
hsa-miR-34a-5p,MINOS1,26.6672,6.48533173312027,47.976177802468,8.51478
hsa-miR-34a-5p,TEF,17.1521,4.32859904269133,42.0320488342185,8.52817
hsa-miR-34a-5p,hsa-mir-4763,3.97281,6.2132356187228,99.9738511883204,8.63468
hsa-miR-34a-5p,CAPN5,51.4864,7.49272709050937,99.6550378402972,8.6839
hsa-miR-34a-5p,TMEM63A,7.42547,56.1824571273584,74.0901769074751,9.48171
hsa-miR-34a-5p,LSM14B,0.064161,70.4436486406734,12.7433844622238,9.57861
hsa-miR-34a-5p,TP53INP2,39.0441,26.3251131887927,83.0220832753014,10.0736
hsa-miR-34a-5p,NGFR,35.6156,66.5429899004106,0.0000131269134937713,10.3249
hsa-miR-34a-5p,TNS4,27.6085,23.438223912208,58.8132193794724,10.7929
hsa-miR-34a-5p,RILPL1,77.18,24.3682393231396,79.5992668356275,11.1533
hsa-miR-34a-5p,ULK1,3.36821,32.6068297890566,24.8125706474076,11.7117
hsa-miR-34a-5p,GRAP,13.8424,10.9928781947787,0.0000131269134937713,11.7767
hsa-miR-34a-5p,CA12,58.9313,2.29340808980194,45.0323493092684,11.7825
hsa-miR-34a-5p,CACNG4,20.5503,33.0856235324259,49.506224585475,11.9216
hsa-miR-34a-5p,LRP1,88.2619,32.7993541318692,2.30339263766555,12.0365
hsa-miR-34a-5p,LIN52,8.45231,25.1719653329166,76.2469025406747,12.5918
hsa-miR-34a-5p,SFXN3,8.35317,14.2134205684897,38.773883270497,12.8695
hsa-miR-34a-5p,CCNF,8.75261,7.65515449888759,56.3663101965795,12.9418
hsa-miR-34a-5p,TULP4,35.2138,49.3464798436508,16.8954534541307,13.277
hsa-miR-34a-5p,CCND2,8.16198,7.25590154724266,8.1275809973225,13.472
hsa-miR-34a-5p,CCDC93,26.3792,4.13179173417049,51.8910172137155,13.604
hsa-miR-34a-5p,SCAMP5,11.6016,6.64291853830203,88.2501128586388,13.8245
hsa-miR-34a-5p,GPR180,86.2221,7.26465335782188,27.9874590719246,14.1384
hsa-miR-34a-5p,DLGAP2,8.17117,1.51530242462329,28.9974175423084,14.7058
hsa-miR-34a-5p,MMP14,4.79614,16.3723992988018,2.93297253574032,14.9746
hsa-miR-34a-5p,SBNO1,11.3121,2.19857099197668,38.1001838161697,15.33
hsa-miR-34a-5p,TACC1,26.8243,5.9949747568352,41.7713614591457,15.5444
hsa-miR-34a-5p,RSL1D1,8.88679,45.9569810559702,1.91303761110127,16.4159
hsa-miR-34a-5p,MAFK,10.3462,29.3206488360014,74.5211334774756,16.4725
hsa-miR-34a-5p,ARX,53.4172,34.33582354615,35.7739503490249,16.6151
hsa-miR-34a-5p,CRB2,20.0442,40.6197552064366,40.237415982831,17.8932
hsa-miR-34a-5p,GATA5,10.7818,21.464891995687,99.5896658110982,18.0139
hsa-miR-34a-5p,RAB3IL1,4.66762,17.5902253583479,14.8468673342927,18.0297
hsa-miR-34a-5p,FAM109B,19.1036,23.661116263234,73.4610695782861,18.3983
hsa-miR-34a-5p,ALDH1A2,37.07,23.7881491810396,46.8293581319982,18.6323
hsa-miR-34a-5p,FBXO32,4.8725,4.65352356413381,10.6407679664455,19.6483
hsa-miR-34a-5p,HS3ST1,6.55908,3.68720750171125,45.0849882323784,19.9699
hsa-miR-34a-5p,CASKIN1,9.63624,19.5680493546353,61.5724572151227,20.0661
hsa-miR-34a-5p,POGK,16.2067,8.80642807320603,58.4913868413456,20.2473
hsa-miR-34a-5p,ABCC1,45.6198,17.7794503460218,82.2760282737964,20.9852
hsa-miR-34a-5p,D2HGDH,3.53573,36.7915428698535,33.4147814559244,21.291
hsa-miR-34a-5p,PHYHD1,28.0779,62.5106590082386,61.1010697515613,21.4649
hsa-miR-34a-5p,IGDCC3,5.10986,13.1138291463794,55.2873435419589,21.6906
hsa-miR-34a-5p,NAALADL1,8.80731,43.1472548668199,0.710927380995669,22.0972
hsa-miR-34a-5p,HOGA1,16.4682,26.2375795930702,41.0654354321912,22.2057
hsa-miR-34a-5p,SCARA5,50.3437,11.5681509685776,84.7853559303523,22.3276
hsa-miR-34a-5p,C19orf60,2.22621,59.3278888293903,60.5437666391833,22.442
hsa-miR-34a-5p,RAB26,15.3729,23.4961175264378,70.6997051826498,23.0449
hsa-miR-34a-5p,SPRY4,94.9321,3.13441836163937,51.6066882674404,23.0752
hsa-miR-34a-5p,GOSR1,39.3558,19.7118733568088,54.7981297298731,23.646
hsa-miR-34a-5p,RAB35,36.4976,10.6574437556761,93.223427812543,23.6631
hsa-miR-34a-5p,SCN4B,10.7895,2.71402940019737,16.9805158535703,23.7202
hsa-miR-34a-5p,ZNF33B,45.2776,19.4603091449295,1.69904266732581,23.7223
hsa-miR-34a-5p,SMARCE1,20.7749,10.6620674998494,9.60183839798098,23.9173
hsa-miR-34a-5p,ST6GALNAC6,7.09114,31.415584449783,71.5831595876941,24.1174
hsa-miR-34a-5p,PCDHGB1,31.2672,45.0319301676769,75.8666552375007,24.2919
hsa-miR-34a-5p,MKLN1,28.2323,3.84804719224103,13.0821507187576,24.4649
hsa-miR-34a-5p,FAM127A,89.5845,63.3039215701461,0.362119035639176,24.54
hsa-miR-34a-5p,OPCML,41.7131,5.12218689313358,61.2614675075417,24.6057
hsa-miR-34a-5p,DUSP7,72.4196,16.4712637784866,1.56890244694856,24.6484
hsa-miR-34a-5p,ADNP,18.6832,21.7422701762924,80.0888219474643,24.6797
hsa-miR-34a-5p,POLR3A,19.2744,46.4593582181128,39.3536727856899,25.2126
hsa-miR-34a-5p,ZNF827,31.9366,16.2792660933017,14.1774341268509,25.3825
hsa-miR-34a-5p,VCP,26.4521,28.5038648150417,3.13675474081763,25.8176
hsa-miR-34a-5p,ADIPOQ,12.6832,11.3923247705515,71.1935134144585,25.9264
hsa-miR-34a-5p,SLFN5,30.3982,6.50697116564978,11.514259044148,25.9823
hsa-miR-34a-5p,C16orf92,25.5196,53.4293311432637,15.8513912624901,26.7242
hsa-miR-34a-5p,SLC6A11,46.1344,9.27221027518326,55.5311365793652,27.8784
hsa-miR-34a-5p,TSPAN11,93.3399,47.1080145363701,86.2458169449288,28.8804
hsa-miR-34a-5p,ARMC7,16.6398,21.4920458433779,49.9892031136514,29.0117
hsa-miR-34a-5p,LDB3,31.2905,11.7759174027352,68.3882526200991,29.1924
hsa-miR-34a-5p,CBS,32.227,50.2145587685629,21.2785823773549,29.2379
hsa-miR-34a-5p,DIAPH2,50.1028,5.40720160934179,82.170606031528,29.5034
hsa-miR-34a-5p,GNB3,6.69491,47.527110088638,97.3555045151988,31.1727
hsa-miR-34a-5p,MLEC,31.3911,32.780719745804,83.8041979081738,31.5017
hsa-miR-34a-5p,XYLB,97.8994,18.0979000766287,6.70744586099885,32.1759
hsa-miR-34a-5p,TAS1R3,31.4247,22.6944826572418,10.4635415073661,32.2287
hsa-miR-34a-5p,TTC38,30.8823,83.1159837956742,45.41048317937,32.244
hsa-miR-34a-5p,MEGF6,5.02595,32.2078943809813,45.2557956307594,32.8367
hsa-miR-34a-5p,ADRA2A,14.9295,17.9463620892012,21.3789638848418,33.4804
hsa-miR-34a-5p,DCAF5,7.74985,66.0561491382874,5.14749596905304,33.8547
hsa-miR-34a-5p,GNAZ,10.41,54.8671684268133,0.150408174811632,33.9535
hsa-miR-34a-5p,USP2,27.591,15.6894250401228,81.1193896720333,34.0316
hsa-miR-34a-5p,HSPA12A,52.0835,8.09230356483705,58.0645389952687,34.3359
hsa-miR-34a-5p,OAS3,82.8291,26.6044276106767,65.8048760445249,35.3461
hsa-miR-34a-5p,CHCHD5,42.9669,63.9494024527065,13.7772470420798,35.7061
hsa-miR-34a-5p,KCNH2,1.93451,94.7203114963009,54.3460388291476,35.7935
hsa-miR-34a-5p,ACSS2,26.05,37.2770360080467,59.6684377935916,35.8456
hsa-miR-34a-5p,TMEM47,62.382,26.5065467415615,54.5852111930041,36.264
hsa-miR-34a-5p,CNR2,47.9684,5.58827889371538,8.08466911711136,36.5008
hsa-miR-34a-5p,ZBTB43,38.1455,7.33627105023431,7.60641627779279,36.6366
hsa-miR-34a-5p,SLC29A3,25.5931,44.15980062601,13.9596848858162,36.7584
hsa-miR-34a-5p,ZNF579,36.0086,91.3927491946398,19.2385550051149,36.8526
hsa-miR-34a-5p,TANC2,54.3787,21.9204198638528,97.036756801743,36.9742
hsa-miR-34a-5p,LETMD1,27.2513,28.3854830232688,88.694196342133,37.3283
hsa-miR-34a-5p,ELOVL2,75.5916,18.5385731017052,19.1641254056052,37.3926
hsa-miR-34a-5p,HES3,64.6729,88.4713251186103,24.1774380649249,38.2623
hsa-miR-34a-5p,PICK1,1.86343,66.520870280044,12.3211572896967,38.6735
hsa-miR-34a-5p,YEATS2,63.8939,20.1469622620379,78.4910796715699,39.5798
hsa-miR-34a-5p,GPR37L1,22.7944,26.8256393042729,76.5392520310945,39.6461
hsa-miR-34a-5p,ZDHHC14,93.7353,2.82987858837787,63.8293937059338,39.7532
hsa-miR-34a-5p,CLN6,2.53451,48.0743770685834,19.0695066131421,40.1788
hsa-miR-34a-5p,CD79A,65.137,52.5866402139965,1.24114967083608,40.2066
hsa-miR-34a-5p,CORO2A,30.5883,22.9851666879137,42.6743880922092,40.6988
hsa-miR-34a-5p,KIAA1614,73.7108,11.6165105307516,7.52940067632484,41.0074
hsa-miR-34a-5p,RASGRF1,7.92963,12.2824691010744,45.6157093449316,41.5215
hsa-miR-34a-5p,NCL,15.2863,24.2918507322167,2.8432238281834,41.6153
hsa-miR-34a-5p,OR51E2,6.58991,69.6926968231857,26.1242380975322,41.8237
hsa-miR-34a-5p,AHNAK,52.2683,56.1874681197873,24.4108739675847,42.5444
hsa-miR-34a-5p,FBXO25,15.0233,48.737075008593,51.8702504365683,42.643
hsa-miR-34a-5p,TSPYL6,51.7946,22.4286057498311,49.8374691205769,43.0464
hsa-miR-34a-5p,USP3,25.5721,63.3901617566944,33.0278131730415,43.058
hsa-miR-34a-5p,SAMD8,20.0439,8.57125220750868,29.346015857049,43.3656
hsa-miR-34a-5p,CCDC8,30.6382,33.370018651425,39.8614480534559,43.3781
hsa-miR-34a-5p,INCA1,56.2704,67.1422643210988,1.51006762066948,43.4673
hsa-miR-34a-5p,FOXRED2,33.4072,30.5505415511957,95.0954831997167,43.7564
hsa-miR-34a-5p,HOXC13,17.9636,68.3035366453799,79.7802082112257,43.8086
hsa-miR-34a-5p,MAZ,3.99744,77.0980994320307,28.556760183236,44.1681
hsa-miR-34a-5p,ZNF532,7.00664,42.0013253184304,3.15866355943873,44.1719
hsa-miR-34a-5p,TRIP11,58.1075,15.5722592078728,78.7835735580381,44.3125
hsa-miR-34a-5p,PON2,41.5278,65.5102220373069,91.3541290772029,44.4106
hsa-miR-34a-5p,ADAL,43.1776,20.4825903252684,24.9069662823413,44.4406
hsa-miR-34a-5p,FCGR2B,20.1696,49.133686927134,20.9861409985407,44.5067
hsa-miR-34a-5p,TLR7,88.6957,31.7269243024149,75.9791266323153,44.6176
hsa-miR-34a-5p,STK10,10.9805,32.8888549487307,72.1595623592057,44.6949
hsa-miR-34a-5p,KPNA1,47.7192,9.63161538131484,0.612934971764665,44.6976
hsa-miR-34a-5p,PLB1,17.1949,34.3684143593512,34.7226683549628,44.9053
hsa-miR-34a-5p,TTC9,30.2447,28.8771566436233,38.5247081985582,45.1018
hsa-miR-34a-5p,HGSNAT,76.2001,6.13271121642887,1.92128131277536,45.1797
hsa-miR-34a-5p,C12orf61,22.1775,36.1449931821072,36.7852871453256,45.851
hsa-miR-34a-5p,SLC27A4,43.4802,49.7630040675008,13.608224903934,46.0336
hsa-miR-34a-5p,FOSB,1.41888,49.9628086775209,38.5565934714346,46.1231
hsa-miR-34a-5p,PARS2,42.7887,42.8146008701933,8.91297735856834,46.3493
hsa-miR-34a-5p,FSTL3,71.0611,34.4388625620314,28.8748646779305,46.3612
hsa-miR-34a-5p,KIF5C,57.7857,15.77558777702,85.2533829040592,46.471
hsa-miR-34a-5p,NCR3,36.6336,73.1754759707036,10.0061735874161,47.1696
hsa-miR-34a-5p,MYLK4,43.107,35.4260125806115,99.4306595079481,47.2218
hsa-miR-34a-5p,P2RY8,72.4343,5.7194631128223,11.860048199401,47.4079
hsa-miR-34a-5p,IMPDH1,7.60716,26.0638213007297,2.60458966778014,47.6978
hsa-miR-34a-5p,MPHOSPH9,1.57819,65.3411649387908,95.7421412122468,47.9454
hsa-miR-34a-5p,SCN2A,47.2415,38.1731362167425,73.3292228591547,47.9611
hsa-miR-34a-5p,HNRNPC,48.2443,28.5118266391793,0.0000131269134937713,48.0847
hsa-miR-34a-5p,RPS23,21.6302,54.9351227507266,39.1488535544466,48.5655
hsa-miR-34a-5p,KRR1,60.3188,36.3017435310566,19.6012253711208,48.6327
hsa-miR-34a-5p,HMP19,8.55679,24.4805800421233,52.896236868328,48.8762
hsa-miR-34a-5p,SHQ1,68.064,64.6685456984696,31.9468381006564,49.0711
hsa-miR-34a-5p,NRBP2,59.0204,33.6808860611849,37.7687948850194,49.1333
hsa-miR-34a-5p,VPS37A,93.9411,37.5173700205102,40.1348291538772,49.2231
hsa-miR-34a-5p,CLLU1,88.0817,22.4616999857648,59.5920522839714,49.2541
hsa-miR-34a-5p,ASH2L,39.6048,45.0278175912012,46.0873068391088,49.3158
hsa-miR-34a-5p,DAB1,41.7831,21.2740018405135,78.7193304433996,49.749
hsa-miR-34a-5p,RIIAD1,7.23819,85.6031476777419,3.7285947625978,50.197
hsa-miR-34a-5p,DENND2D,49.6448,64.2594876209899,88.7368850648148,50.2822
hsa-miR-34a-5p,C11orf57,53.6871,31.5044191996446,84.4678158929379,50.6532
hsa-miR-34a-5p,AC124890.1,23.8596,28.7223812607781,4.26443537141355,50.7725
hsa-miR-34a-5p,GATS,38.104,51.8606194392119,0.897605217790591,50.9875
hsa-miR-34a-5p,SIGMAR1,20.9792,26.3606083639117,27.9272721735557,51.483
hsa-miR-34a-5p,HHIPL1,20.8922,52.7470926562705,54.9011891277127,51.6191
hsa-miR-34a-5p,PTPRE,31.2645,12.4880592000349,28.2729038058466,51.6376
hsa-miR-34a-5p,SH2D2A,44.9175,67.5972577866717,18.5107726671932,51.7493
hsa-miR-34a-5p,SLC30A9,50.0874,58.4080890274446,7.42685322811149,51.7714
hsa-miR-34a-5p,GIMAP6,42.1693,52.7215497613234,0.0000131269134937713,51.8412
hsa-miR-34a-5p,CLDN19,24.7502,9.43132283849254,12.4412948019917,51.9857
hsa-miR-34a-5p,P2RY2,5.07099,45.0934561705454,21.8419107430266,52.2098
hsa-miR-34a-5p,SSTR3,16.8165,44.6850873949608,9.42110705299873,52.2313
hsa-miR-34a-5p,ERLIN2,42.3472,5.21918483622574,77.4018346436837,52.4097
hsa-miR-34a-5p,CSF2RB,54.7832,29.5925745611664,6.48435396617221,52.6666
hsa-miR-34a-5p,SPRR2A,37.6462,65.7506180094913,46.341916453234,52.76
hsa-miR-34a-5p,PSD4,36.4914,34.8145320949031,88.8100807344561,52.9571
hsa-miR-34a-5p,ARHGEF6,72.4272,10.1085813129172,17.2857165923005,52.9689
hsa-miR-34a-5p,CCDC69,65.4677,55.8935621836279,57.7499262595634,53.1513
hsa-miR-34a-5p,CSRP1,17.9219,52.4120919352143,60.2111043974241,53.4141
hsa-miR-34a-5p,AC006547.14,12.7365,75.176534862334,13.892580104036,53.438
hsa-miR-34a-5p,CTXN2,77.5889,24.7515608815443,65.42755604306,53.4899
hsa-miR-34a-5p,SUOX,35.2979,52.7181884464638,9.24153087640394,53.5088
hsa-miR-34a-5p,PHKG2,45.279,19.0771192509318,40.5485763402874,53.5832
hsa-miR-34a-5p,LYSMD4,7.05704,48.0197595745969,9.46240432285014,53.6339
hsa-miR-34a-5p,NRXN2,39.8419,69.2879372013445,86.7387194197064,53.8069
hsa-miR-34a-5p,TFRC,86.4538,32.758298071798,34.0021058194627,53.8651
hsa-miR-34a-5p,BTN1A1,96.7247,34.666812375277,55.7544647586348,54.1984
hsa-miR-34a-5p,CBX2,12.5444,26.4378798808577,69.840666836704,54.2985
hsa-miR-34a-5p,ZNF367,69.0437,49.2918933295249,40.4870111160016,54.4544
hsa-miR-34a-5p,TFCP2,28.1891,32.8847346272898,57.3148215848989,54.4812
hsa-miR-34a-5p,SRR,71.9754,41.0351254304845,95.2398004866672,54.5015
hsa-miR-34a-5p,PAPD7,66.471,96.2249258690664,88.6845480607151,54.6933
hsa-miR-34a-5p,MORN4,90.7886,16.3834358740898,99.3970414824906,54.8118
hsa-miR-34a-5p,SIAE,58.6189,13.247770573067,24.6712988043876,54.9248
hsa-miR-34a-5p,C1orf132,15.7391,73.9504371800458,8.45089687667409,54.9913
hsa-miR-34a-5p,TYMS,55.2752,80.1995784570388,9.59537995654204,55.153
hsa-miR-34a-5p,ELF5,14.2879,47.3448245897066,78.6822469127797,55.2382
hsa-miR-34a-5p,GJA3,65.4187,14.1038912718425,26.9340505178764,55.2454
hsa-miR-34a-5p,ZNF25,86.7111,34.7445795699902,2.08731051464458,56.0127
hsa-miR-34a-5p,MORN3,12.7273,57.8067002312802,1.00256801808679,56.0681
hsa-miR-34a-5p,CYYR1,49.7429,41.0782493962412,15.402792120754,56.44
hsa-miR-34a-5p,RC3H1,87.2938,54.7684588464308,50.5412948413724,56.5028
hsa-miR-34a-5p,PER1,23.6662,44.1380992337596,69.6665777099496,56.5198
hsa-miR-34a-5p,ZSCAN30,17.0015,73.4635112233064,1.6809537805314,56.8447
hsa-miR-34a-5p,RAB9B,65.9182,18.1884387188155,11.6476416121583,57.1102
hsa-miR-34a-5p,PAG1,64.478,19.4713457202175,96.8553428572591,57.4373
hsa-miR-34a-5p,TMEM144,89.0536,40.5563626669756,38.7851461622746,57.6108
hsa-miR-34a-5p,FAM27E1,12.8735,69.6916667428255,0.0000131269134937713,57.9607
hsa-miR-34a-5p,ATG7,51.3437,26.5373329778911,60.842600824869,58.4228
hsa-miR-34a-5p,APPL1,76.7357,22.8238235746515,75.4054280049835,58.4719
hsa-miR-34a-5p,FAM3D,19.0358,56.9335870790437,98.4702813898303,58.5073
hsa-miR-34a-5p,MYO1C,46.2748,43.9796914622757,87.4219490132302,58.5818
hsa-miR-34a-5p,PGR,37.7307,37.4290232034508,54.7988385832017,58.6721
hsa-miR-34a-5p,CEACAM7,53.2411,27.7449356834862,0.684949219191495,58.7946
hsa-miR-34a-5p,MED31,48.9955,42.1998365192764,80.9109342857522,59.1089
hsa-miR-34a-5p,ERBB2IP,74.6681,49.2056453980114,42.2201049969303,59.2464
hsa-miR-34a-5p,ZFHX2,19.6714,49.4499603225437,59.6540506964025,59.2707
hsa-miR-34a-5p,ZNF324B,22.734,58.1427387776617,9.08252457325389,59.4356
hsa-miR-34a-5p,WTIP,4.54649,68.1923809060587,4.7456680200952,59.5124
hsa-miR-34a-5p,MMS19,48.7172,57.6004673002151,65.5144037027348,59.5812
hsa-miR-34a-5p,TMEM80,29.1621,62.7933192550521,25.3792201221932,60.1497
hsa-miR-34a-5p,GABPA,79.7527,45.3417829870069,96.040109021642,60.1541
hsa-miR-34a-5p,UBL4A,30.0202,36.0815619178207,91.6149871021511,60.2869
hsa-miR-34a-5p,CNIH4,47.2252,31.5973897608773,81.7012926202986,60.5046
hsa-miR-34a-5p,HMBOX1,44.0166,26.8332835848407,73.2802857256499,61.2532
hsa-miR-34a-5p,CPA6,36.443,88.1076138118751,27.6701028112992,61.5936
hsa-miR-34a-5p,CD97,5.49229,54.3814274497363,7.014825667369,61.7265
hsa-miR-34a-5p,MGAT5B,47.1195,42.7116780287887,99.7136757628738,61.7696
hsa-miR-34a-5p,SNX15,14.6551,71.2127701463194,96.8996593172141,62.264
hsa-miR-34a-5p,CD200,34.8769,70.8465262359919,80.3636995160238,62.3311
hsa-miR-34a-5p,C22orf28,31.1391,61.1481802352518,0.0000131269134937713,62.4256
hsa-miR-34a-5p,SPTLC2,73.4697,16.0729402226554,49.721348443811,62.463
hsa-miR-34a-5p,IRF2BPL,48.2318,50.9977528758217,2.66723129897241,62.6529
hsa-miR-34a-5p,RBM15B,67.0832,20.9761072473201,44.7580755787295,62.8854
hsa-miR-34a-5p,SNCG,65.3901,54.8453353701559,4.03002807715527,63.0157
hsa-miR-34a-5p,SOCS3,20.6689,69.798709905671,62.2257311920537,63.0637
hsa-miR-34a-5p,ACADL,65.9912,59.321901971357,8.1387651276192,63.2264
hsa-miR-34a-5p,MAGEB2,86.6591,81.2776698559917,29.3022638543742,63.4326
hsa-miR-34a-5p,KIAA0754,65.4974,38.5197698754005,50.6234430660164,63.5479
hsa-miR-34a-5p,KIF6,32.7589,47.7904466474912,69.0846222540302,63.7912
hsa-miR-34a-5p,RNF128,76.8943,69.9084792962367,81.4170161816775,63.8298
hsa-miR-34a-5p,VSTM4,39.4727,22.9396805077971,20.5062210412084,63.9417
hsa-miR-34a-5p,DUOX1,13.4188,63.0100078890215,83.1279780864557,64.7103
hsa-miR-34a-5p,PDGFB,31.1563,36.3069094227879,60.4700984006562,64.7851
hsa-miR-34a-5p,MAPRE2,86.1436,44.9701408359946,31.2230200906098,64.9775
hsa-miR-34a-5p,FAM127B,87.6467,58.0461590626857,1.59615391936163,65.0852
hsa-miR-34a-5p,EIF2C1,44.5605,17.9276037836943,43.1386213879164,65.2335
hsa-miR-34a-5p,PCDHB10,86.0286,78.3875044591637,0.0000131269134937713,65.277
hsa-miR-34a-5p,GTF3C2,37.0146,41.5702328152003,72.9300071659821,65.3877
hsa-miR-34a-5p,SCN3A,82.8378,32.0718618137128,33.5489122580037,65.3942
hsa-miR-34a-5p,GNG12,37.5324,60.4955584948559,98.6984008925251,65.4445
hsa-miR-34a-5p,ZC2HC1C,25.533,49.596069089426,18.7953772786517,65.5347
hsa-miR-34a-5p,RASA3,14.5483,60.5542730753878,0.0000131269134937713,65.6731
hsa-miR-34a-5p,HAPLN3,69.4139,52.6041360901898,2.38082830036531,65.7698
hsa-miR-34a-5p,ALPK1,25.8878,42.2752414996297,11.7436387305382,65.8007
hsa-miR-34a-5p,KIAA1211L,29.9825,54.3360884239569,98.6521810301135,65.8213
hsa-miR-34a-5p,RABL3,24.5132,64.8018133131923,25.1692551408603,65.8361
hsa-miR-34a-5p,CASP2,44.9755,45.4293553075549,15.6898777188627,65.8741
hsa-miR-34a-5p,DHX40,45.1819,54.6246038643968,40.1133797772284,65.9477
hsa-miR-34a-5p,HSD17B10,43.5755,81.6568013882695,47.5491855603427,65.9477
hsa-miR-34a-5p,LRRC46,8.20244,65.2058836331384,62.2472330763565,66.0217
hsa-miR-34a-5p,CA3,41.8483,75.4095343928342,83.7967549482229,66.1805
hsa-miR-34a-5p,PROM2,40.3633,72.7746043213498,58.8808361108788,66.3877
hsa-miR-34a-5p,PCNX,33.3691,66.7127363008219,28.4014031620372,66.5657
hsa-miR-34a-5p,CTD-2192J16.17,96.7105,21.6911534065377,1.21926710604196,66.6574
hsa-miR-34a-5p,PTEN,68.1317,12.6714754638731,45.5284547509385,66.7
hsa-miR-34a-5p,SMARCAD1,57.5877,43.644659761359,6.41071198147215,66.7195
hsa-miR-34a-5p,LMO4,30.8945,83.0180022420125,23.8374378785228,66.9278
hsa-miR-34a-5p,MUC17,11.5095,76.3163226533879,0.0000131269134937713,66.9504
hsa-miR-34a-5p,RHBG,15.1798,90.9031047551453,34.9260567526353,67.2119
hsa-miR-34a-5p,AKAP10,30.9805,78.1534206335474,35.0327391785991,67.2447
hsa-miR-34a-5p,MPHOSPH8,94.2429,29.5353625038667,87.0918465196024,67.3658
hsa-miR-34a-5p,BICC1,58.0802,31.6951854353762,12.0235439069659,67.4692
hsa-miR-34a-5p,SNX10,42.2386,62.1191432767429,48.7785078821208,67.5935
hsa-miR-34a-5p,ITGA11,87.5784,40.2592812951193,23.5854011394423,67.7057
hsa-miR-34a-5p,PITX1,69.0252,11.6677047501575,98.9512646271556,67.7661
hsa-miR-34a-5p,GOLPH3,64.4463,46.5457533039634,38.214348582825,67.7849
hsa-miR-34a-5p,PRMT2,40.4406,86.2732033346102,0.0000131269134937713,67.8045
hsa-miR-34a-5p,WNT9B,45.0473,59.0115689641899,93.9251532271795,67.886
hsa-miR-34a-5p,UQCR11,39.3633,24.9620303085269,20.9621450006741,67.909
hsa-miR-34a-5p,DSCR3,54.8552,49.3370929459322,43.122685314935,67.9363
hsa-miR-34a-5p,CELSR1,12.0937,41.3739444193422,70.6178982577567,67.9552
hsa-miR-34a-5p,PHLDB3,3.44072,94.4277454391062,49.2491339846995,68.0396
hsa-miR-34a-5p,ELF2,40.7009,68.0673229543572,4.3277596021075,68.0695
hsa-miR-34a-5p,LRPPRC,24.0109,64.8888667210776,51.6448875857073,68.0896
hsa-miR-34a-5p,RBAK,86.4716,70.4311792468393,6.56654157155671,68.0952
hsa-miR-34a-5p,CPA4,11.2449,52.0258969947522,73.8403454898616,68.1834
hsa-miR-34a-5p,OSBPL7,2.08327,55.9609046552972,92.0749804047999,68.1983
hsa-miR-34a-5p,Z99715.1,87.4437,68.2925620298129,58.3569935009964,68.2224
hsa-miR-34a-5p,RCC2,23.9827,55.5544024163052,41.8297630972795,68.2762
hsa-miR-34a-5p,MAGEA11,26.3483,76.4180527701649,1.82725323141948,68.4532
hsa-miR-34a-5p,C7orf63,19.2422,64.0360066526152,58.4880919860587,68.6077
hsa-miR-34a-5p,C4orf52,56.3222,73.4038052872398,17.4230634881858,68.9025
hsa-miR-34a-5p,SULF2,50.0894,45.4730524007301,45.2811437007158,69.1191
hsa-miR-34a-5p,ETS1,86.6845,24.2781034191388,90.0744387883491,69.2551
hsa-miR-34a-5p,SCMH1,15.1022,78.6039607441796,52.9865500331651,70.0762
hsa-miR-34a-5p,HECW2,63.0105,37.7262517296443,83.6398752050588,70.4987
hsa-miR-34a-5p,RBM27,78.7883,43.9702193699409,3.1456547881664,70.6985
hsa-miR-34a-5p,TAGAP,51.2308,55.4510923266448,93.0173221437772,70.8883
hsa-miR-34a-5p,SEMA3D,74.4511,37.7657975215182,69.1446516294372,70.9039
hsa-miR-34a-5p,TUSC5,29.9019,51.2604543475355,98.7796171063111,71.2597
hsa-miR-34a-5p,SLC48A1,55.8962,30.4112096287885,54.6100735671613,71.5512
hsa-miR-34a-5p,APH1A,34.2344,63.2824680167793,19.1885808454441,71.7478
hsa-miR-34a-5p,C9orf38,78.958,96.1641898526397,4.80177244836758,71.8722
hsa-miR-34a-5p,SEMA3A,59.6616,33.7031993056794,2.55153068343831,72.1438
hsa-miR-34a-5p,LGI2,57.4713,42.0601328385437,12.1359365402996,72.1837
hsa-miR-34a-5p,PLOD1,32.5474,59.9409492879821,99.879888741532,72.2053
hsa-miR-34a-5p,GINM1,73.0868,48.8742848105589,32.6552582411747,72.427
hsa-miR-34a-5p,FGF18,94.3484,41.5971620589029,68.6858528759164,72.6809
hsa-miR-34a-5p,RRP1B,35.5038,52.8366321979576,37.113144936746,72.7209
hsa-miR-34a-5p,MADD,61.2493,74.4114562284777,22.2709376567435,72.7518
hsa-miR-34a-5p,EID1,70.3517,52.4852508756845,69.992203926076,72.8308
hsa-miR-34a-5p,ICOS,43.7651,68.9033299787308,50.516931289928,73.046
hsa-miR-34a-5p,QDPR,55.4997,59.0287472968136,99.8412168543793,73.2963
hsa-miR-34a-5p,HEBP1,83.8615,73.4602815728537,90.3036740786909,73.4293
hsa-miR-34a-5p,CCNJ,42.0931,87.2854780200214,63.6112506574943,73.5244
hsa-miR-34a-5p,BEND4,41.2662,38.0649932688508,24.848420248159,73.5679
hsa-miR-34a-5p,RILP,54.8501,97.4193001742462,66.5968752432581,73.7274
hsa-miR-34a-5p,KDM4C,7.14595,90.3603763247569,79.6617509438579,73.8357
hsa-miR-34a-5p,FKBP9,18.6991,60.4787906453833,10.1793307033125,73.9897
hsa-miR-34a-5p,GPATCH1,59.7557,85.6011804566029,3.67187336939121,74.0634
hsa-miR-34a-5p,GAD2,37.8538,57.2019501202561,35.0552387083275,74.2124
hsa-miR-34a-5p,TRAPPC6B,78.9305,34.5215090847666,76.260095088736,74.3657
hsa-miR-34a-5p,CDK2AP1,71.8127,63.756204297929,16.3412745471641,74.4418
hsa-miR-34a-5p,CELF2,66.4831,39.1576452022187,58.7815572641255,74.4612
hsa-miR-34a-5p,EPSTI1,13.8406,75.6103768281797,68.5063029531486,74.4678
hsa-miR-34a-5p,SUN1,0.608441,79.5898715683415,0.0000131269134937713,74.4955
hsa-miR-34a-5p,ABCC5,52.2809,69.6271821632834,77.6100799993489,74.6979
hsa-miR-34a-5p,TNFSF14,46.7661,42.0078465790567,14.2502753698278,74.7848
hsa-miR-34a-5p,SPTY2D1,32.0555,69.1237516858853,52.035334500666,74.7914
hsa-miR-34a-5p,PATE4,79.3337,27.7533776954608,11.7740931698438,75.0882
hsa-miR-34a-5p,CCDC153,65.0873,73.235034752433,4.39353856562479,75.4382
hsa-miR-34a-5p,ZC3H15,81.3557,70.0890299229825,76.086071596549,75.5138
hsa-miR-34a-5p,SVOP,6.74511,47.0115974656615,99.9334859293271,75.6919
hsa-miR-34a-5p,AP001631.10,27.6944,86.125808903519,59.9997873440014,75.9773
hsa-miR-34a-5p,ENPP1,36.0064,43.1610254147932,27.2355757208284,76.099
hsa-miR-34a-5p,PDCD10,58.7034,76.2011085523468,48.3048625894386,76.1629
hsa-miR-34a-5p,ZNF235,76.1345,71.5023311570498,1.69082521947871,76.2767
hsa-miR-34a-5p,YIPF5,49.7743,39.5404788278212,0.0000131269134937713,76.2882
hsa-miR-34a-5p,ZNF285,14.8541,52.8087890483715,84.8519225086792,76.3971
hsa-miR-34a-5p,LTBP2,97.2339,42.8356749202695,65.9135668882533,76.7578
hsa-miR-34a-5p,CHMP7,18.7563,64.0242885203972,85.4451146025492,77.048
hsa-miR-34a-5p,URB1,74.2992,38.3720888806001,94.9284300985949,77.0909
hsa-miR-34a-5p,FMNL2,53.7714,78.202965175384,74.2671802090251,77.1149
hsa-miR-34a-5p,UGT3A1,46.4784,51.4213250179257,16.4026691215745,77.2356
hsa-miR-34a-5p,STK4,91.9812,32.5138050130681,79.9275184344528,77.3217
hsa-miR-34a-5p,ZNF501,90.9246,46.8970416866551,0.0000131269134937713,77.3845
hsa-miR-34a-5p,ZNF184,83.4292,86.5104703408884,0.962163378352958,77.6789
hsa-miR-34a-5p,NSA2,87.8388,85.9703519637437,14.868382345509,78.261
hsa-miR-34a-5p,ARHGAP30,18.9909,80.5104303768685,90.7675792015607,78.3547
hsa-miR-34a-5p,CCDC50,61.6544,81.6802918674613,7.98011325113348,78.3732
hsa-miR-34a-5p,STEAP2,81.5182,46.6023922338447,30.7650614595526,78.5874
hsa-miR-34a-5p,VTI1A,63.6876,53.1252018531533,83.4742791913349,78.75
hsa-miR-34a-5p,COX20,41.1635,85.8597538619107,8.55584655005679,78.9052
hsa-miR-34a-5p,PPP3R1,40.0517,85.2071088866194,45.9810838551172,78.9461
hsa-miR-34a-5p,INPP5D,8.03311,64.5983840594987,33.1852573734858,78.9487
hsa-miR-34a-5p,FAM73B,65.2543,48.4224822706131,97.0200987485194,78.9888
hsa-miR-34a-5p,FRMD5,43.3918,62.9399701694924,94.7795052650081,79.2869
hsa-miR-34a-5p,USF1,24.9399,64.656378358275,95.4105685043077,79.4773
hsa-miR-34a-5p,ADO,10.9617,65.7281576106597,98.961057304622,79.5151
hsa-miR-34a-5p,ZZZ3,80.9066,63.1461953555923,42.8938963396521,79.5776
hsa-miR-34a-5p,ITGB8,87.7696,66.4206736663596,93.6305590345523,79.6508
hsa-miR-34a-5p,UNC13B,60.6881,68.0271498203091,23.9959584858735,79.7069
hsa-miR-34a-5p,TMEM213,59.799,40.5438235684555,41.1584658681215,79.828
hsa-miR-34a-5p,SULF1,61.4033,71.3508473843781,85.2408598285861,79.8881
hsa-miR-34a-5p,ARL5A,67.8106,75.0241991434998,51.4965928439681,80.0068
hsa-miR-34a-5p,REPS2,57.4857,33.1928603193993,81.7454909380322,80.0122
hsa-miR-34a-5p,CHST10,55.3678,55.2439454896963,19.8757485130161,80.0591
hsa-miR-34a-5p,CNGA3,62.9452,86.7231935527193,60.9881389147744,80.0877
hsa-miR-34a-5p,FBXL17,11.5049,81.2059514790328,8.05852030543177,80.0976
hsa-miR-34a-5p,TUBA3C,24.3737,96.6673957260494,1.34703135507684,80.1002
hsa-miR-34a-5p,TULP3,52.242,78.7448416596097,25.1449309701564,80.3099
hsa-miR-34a-5p,CTD-3074O7.11,46.0072,60.460892031004,79.1710406636337,80.4732
hsa-miR-34a-5p,PGAP2,53.7818,66.4573693110714,88.6340882052451,80.5335
hsa-miR-34a-5p,WFIKKN2,43.2566,58.6499642879659,39.593632764356,80.7448
hsa-miR-34a-5p,TMEM79,33.63,94.6662593847678,72.1327440749379,80.8267
hsa-miR-34a-5p,SLC16A14,25.0955,70.8359388686806,72.5209856684296,80.852
hsa-miR-34a-5p,ZSWIM4,10.6509,76.2311512720253,49.1865842419017,81.0743
hsa-miR-34a-5p,C17orf110,6.44744,86.1267925140885,20.129767416034,81.1807
hsa-miR-34a-5p,RP11-111M22.2,74.3523,69.8039377571232,83.0916690437319,81.4171
hsa-miR-34a-5p,CCDC135,63.7692,73.9341107935848,67.2747228022495,81.5167
hsa-miR-34a-5p,SOX6,48.4756,62.3292254554698,87.005169509803,81.6852
hsa-miR-34a-5p,PROZ,19.9196,86.0114080238148,51.2225685247857,81.7413
hsa-miR-34a-5p,BCL6,17.8299,91.13742867468,61.3882472380646,81.8496
hsa-miR-34a-5p,ALDH6A1,75.1141,40.6362210022697,59.9705405807373,81.8919
hsa-miR-34a-5p,MIER2,88.0751,91.8595769669075,0.0000131269134937713,81.9109
hsa-miR-34a-5p,RSPO2,40.5518,74.4877208999588,20.1972266244785,82.2352
hsa-miR-34a-5p,PPP3R2,64.8934,53.2022797459713,73.0216461490821,82.2806
hsa-miR-34a-5p,TMX4,57.8394,55.0363184649107,61.9455240966157,82.3264
hsa-miR-34a-5p,TMC3,94.3282,80.3060252575704,15.5368441613523,82.3704
hsa-miR-34a-5p,COL6A6,37.1407,80.3581721076854,32.8296230331125,82.5261
hsa-miR-34a-5p,DPP3,27.0229,82.7085444159034,87.9092856766865,82.5629
hsa-miR-34a-5p,PRAP1,30.9272,85.5003022859884,2.1658882188183,82.6279
hsa-miR-34a-5p,RASA4,11.0035,80.2462186369574,0.0000131269134937713,82.656
hsa-miR-34a-5p,PDE7A,59.8766,75.3907141276063,17.7008421046275,82.666
hsa-miR-34a-5p,INF2,2.94038,82.5831921555276,54.7690536164844,82.6947
hsa-miR-34a-5p,TIGD6,33.55,77.8280314141981,6.2367409969392,82.7891
hsa-miR-34a-5p,PAQR8,48.3982,59.3080462287674,1.54686235919252,82.8284
hsa-miR-34a-5p,NOTCH4,58.9712,84.5671733990809,31.1263797534687,83.1334
hsa-miR-34a-5p,ZMAT3,60.7923,47.7837162728068,12.9271481242231,83.1751
hsa-miR-34a-5p,ZDHHC23,49.9787,69.8859724276144,99.6947204997889,83.3389
hsa-miR-34a-5p,FAM53A,7.9277,86.099259163107,4.40509024949931,83.72
hsa-miR-34a-5p,S100A7A,97.6748,31.8186246893688,1.80080250072953,83.8375
hsa-miR-34a-5p,GREM2,47.6207,51.5391414272453,83.1266916489333,83.9497
hsa-miR-34a-5p,TP53TG3C,32.0191,83.0062841097945,0.0000131269134937713,84.6545
hsa-miR-34a-5p,TSHZ2,94.264,56.6327493991069,88.3570840766995,84.6697
hsa-miR-34a-5p,MAP2K1,28.79,67.5782361523509,84.7856315955356,84.6855
hsa-miR-34a-5p,DDX26B,71.4952,88.6078146388205,0.453075419237518,85.3069
hsa-miR-34a-5p,ZNF207,41.3781,36.71104944742,20.2373162182885,85.3996
hsa-miR-34a-5p,SCD5,63.3852,74.1373696580459,59.9336145730793,85.5132
hsa-miR-34a-5p,CAV1,66.5034,75.9395378455397,92.5845934404551,85.5288
hsa-miR-34a-5p,SMAD7,67.246,67.0526473297606,9.60105078317135,85.5371
hsa-miR-34a-5p,GNPDA1,23.4202,73.3568475637515,51.0697187440642,85.607
hsa-miR-34a-5p,CCDC104,24.1663,89.6638793569882,27.7932332598707,85.7945
hsa-miR-34a-5p,C2CD4A,53.3242,69.8580285934818,88.1361056149454,85.9919
hsa-miR-34a-5p,CXCL16,81.9322,65.3377881340009,69.8150956092181,86.0013
hsa-miR-34a-5p,PDCD4,77.685,91.7751645921261,97.1904204511011,86.1884
hsa-miR-34a-5p,C2orf16,44.4416,98.5788840961324,60.4974286345503,87.049
hsa-miR-34a-5p,HBS1L,30.221,65.5490862722507,6.83797988878091,87.4454
hsa-miR-34a-5p,CDKN1B,60.4661,88.974391582648,2.39910096394864,87.6003
hsa-miR-34a-5p,ADIPOR2,65.1225,55.068847318391,95.7091664055505,87.6328
hsa-miR-34a-5p,MAP9,81.0331,73.7999757427693,57.6137739128061,87.7932
hsa-miR-34a-5p,RP11-433C9.2,66.076,89.2309125722005,23.6901276552957,87.8061
hsa-miR-34a-5p,MYPN,54.2643,65.9920440620359,53.4477116311148,87.8617
hsa-miR-34a-5p,GIPC2,73.1092,88.1077842011076,31.5963888911132,88.0289
hsa-miR-34a-5p,CYFIP2,61.0111,62.0487647787488,75.4481429814922,88.0914
hsa-miR-34a-5p,FBXO16,22.2802,85.2069927121427,4.967381589005,88.2073
hsa-miR-34a-5p,EIF2C4,53.7147,53.9652052795259,66.8287752970391,88.2724
hsa-miR-34a-5p,MED19,15.431,79.6605598649402,61.6312526606613,88.3259
hsa-miR-34a-5p,FAM122B,51.7804,86.9525916744413,43.4439533957816,88.4955
hsa-miR-34a-5p,TAL2,8.89482,85.6953359974981,22.9884678752266,88.564
hsa-miR-34a-5p,NCOA1,54.801,78.4593390105993,44.5042141986735,88.5949
hsa-miR-34a-5p,GPR64,56.6229,76.3720554223508,97.6540892895281,88.6035
hsa-miR-34a-5p,STMN1,33.2658,90.2518771084699,1.77314409399815,88.6098
hsa-miR-34a-5p,MC2R,61.37,59.8961601547258,8.9587771597481,88.8575
hsa-miR-34a-5p,MIER3,99.0539,75.2843447767258,46.6565685696797,88.9354
hsa-miR-34a-5p,CEACAM1,24.5963,69.879513126709,7.01448436761816,89.1298
hsa-miR-34a-5p,SHE,70.8021,85.0658717027941,65.8406206299685,89.1729
hsa-miR-34a-5p,SFT2D3,39.1116,74.6919866098847,6.4228281226269,89.2052
hsa-miR-34a-5p,FAM126B,44.6265,83.235039399412,92.6414723566236,89.2326
hsa-miR-34a-5p,GIMAP1,62.7366,56.4157974363236,3.01589524828047,89.237
hsa-miR-34a-5p,ZDHHC16,45.9019,71.0141427709967,97.2603737731094,89.4017
hsa-miR-34a-5p,TMEM246,39.0846,54.3122494213349,83.2498614782454,89.5251
hsa-miR-34a-5p,ITPR2,53.0239,76.9754191846194,54.3117775849288,89.6057
hsa-miR-34a-5p,JHDM1D,41.0923,58.8520691526249,78.5754463445943,89.6582
hsa-miR-34a-5p,MECR,31.0662,95.106367027391,97.7158514175163,89.7967
hsa-miR-34a-5p,NDUFC2,63.7368,80.9785515583102,13.952767002405,89.8101
hsa-miR-34a-5p,USP15,79.9264,90.4264098973219,46.8942313384844,89.8206
hsa-miR-34a-5p,TEX22,34.9519,74.5859735273994,11.3261766276093,89.8341
hsa-miR-34a-5p,KSR1,81.0982,80.6974093246592,13.2838588715029,89.8963
hsa-miR-34a-5p,ARID2,89.5954,77.2311889125558,82.2473984754665,89.9147
hsa-miR-34a-5p,HSPB6,85.5644,89.5754473453125,68.6763752443739,89.9172
hsa-miR-34a-5p,FBXO39,67.1991,95.0801813003394,14.8070665325796,90.1586
hsa-miR-34a-5p,NOP2,50.9423,92.8995011777768,25.9444781441485,90.4148
hsa-miR-34a-5p,RXFP1,84.4941,91.5459291146715,35.5352899347947,90.749
hsa-miR-34a-5p,GABRG3,52.325,90.4089527459541,0.0000131269134937713,91.1201
hsa-miR-34a-5p,RAPH1,97.1936,72.8215388099427,99.1352908274248,91.2552
hsa-miR-34a-5p,TWIST2,39.5599,80.711079188086,0.0000131269134937713,91.2835
hsa-miR-34a-5p,TMEM5,39.8115,96.5572623221233,1.0657609796458,91.4504
hsa-miR-34a-5p,GIN1,49.0954,88.5936723325217,26.5898628460697,91.4961
hsa-miR-34a-5p,SYNC,68.5008,80.1679402745466,95.8101123703176,91.5351
hsa-miR-34a-5p,AKAP6,56.192,83.0614282614087,93.6979657353428,91.6058
hsa-miR-34a-5p,MSTN,14.9094,92.9309457361411,8.26483600481338,91.8287
hsa-miR-34a-5p,MAP3K15,53.4404,84.9894753669061,1.78755744501431,91.9438
hsa-miR-34a-5p,TEDDM1,62.4522,65.0216618929283,21.0228175948423,92.0474
hsa-miR-34a-5p,TP53TG3B,49.6975,96.6718026111995,0.0000131269134937713,92.1999
hsa-miR-34a-5p,ARHGDIB,86.6006,78.5019440636934,45.0526172637028,92.2586
hsa-miR-34a-5p,DDX10,50.0126,90.3135967354662,6.05918636502245,92.268
hsa-miR-34a-5p,ALCAM,76.4058,83.5663147922483,92.057836655777,92.3983
hsa-miR-34a-5p,C9orf69,37.5876,77.9180046739315,97.8506385652704,92.4524
hsa-miR-34a-5p,LRRFIP1,56.1002,94.5777576684061,83.4595639213084,92.4632
hsa-miR-34a-5p,C12orf29,36.0092,94.5786483393943,3.46386429816891,92.6541
hsa-miR-34a-5p,MFHAS1,57.1994,70.2414973062237,32.3861565145524,92.6704
hsa-miR-34a-5p,C14orf28,61.2845,88.6709825742932,96.3591980348485,92.8568
hsa-miR-34a-5p,DKK1,63.7189,93.3643694738706,19.1704919586497,92.9835
hsa-miR-34a-5p,C20orf112,37.5757,65.5223351627457,80.035513551766,93.5
hsa-miR-34a-5p,TMEM164,17.1747,76.2153825230525,98.9921418357752,93.6513
hsa-miR-34a-5p,CREB5,32.1753,89.3516101085426,82.2377895747891,93.7326
hsa-miR-34a-5p,TNKS,48.6328,65.6610474879438,32.7945741740841,93.7343
hsa-miR-34a-5p,SESTD1,78.5204,59.6734614278277,41.3098848152722,93.8735
hsa-miR-34a-5p,FAM183B,60.5398,98.0708608544215,3.53712560237765,93.8764
hsa-miR-34a-5p,DYNC1LI1,49.6657,93.9505626484807,43.5778085326776,93.9705
hsa-miR-34a-5p,RRP15,74.7316,94.3593496521814,66.7401948847831,94.0095
hsa-miR-34a-5p,NMUR1,70.1551,91.692525814356,7.16780671722541,94.0542
hsa-miR-34a-5p,NAV3,66.6956,98.5398881967816,95.1820683211216,94.0983
hsa-miR-34a-5p,AREG,72.1082,99.009813955095,92.0206874905897,94.1259
hsa-miR-34a-5p,MTMR10,88.4562,65.8676444323692,87.7788960449528,94.17
hsa-miR-34a-5p,PPFIA1,86.8871,76.3124888956563,98.5095702419172,94.3822
hsa-miR-34a-5p,MSANTD3-TMEFF1,62.1097,96.7884495307868,52.3733919038711,94.5849
hsa-miR-34a-5p,GATAD2B,99.4221,85.6555268768103,93.4812797743011,94.8247
hsa-miR-34a-5p,SLC25A27,51.9981,86.0089915946992,99.7486983680752,94.8419
hsa-miR-34a-5p,SRC,57.115,97.8322307342831,55.7071947431437,95.1605
hsa-miR-34a-5p,GINS3,87.9531,72.5092308366715,14.8027083972997,95.1777
hsa-miR-34a-5p,RRAS,99.9127,86.7096863335598,93.7684310069774,95.3568
hsa-miR-34a-5p,FAT3,86.2887,73.0320392167858,74.962854116541,95.4286
hsa-miR-34a-5p,FGF7,47.6021,95.0759215695265,15.143509325425,95.4381
hsa-miR-34a-5p,GAS1,64.5818,90.9964935444941,96.5419903052493,95.4458
hsa-miR-34a-5p,PKP4,88.6094,94.9135561208692,78.9827350895656,95.7031
hsa-miR-34a-5p,C11orf9,31.1658,82.9597755942828,46.8261945458462,95.7355
hsa-miR-34a-5p,MARCKSL1,21.7699,99.1583004262674,17.1187028719193,96.0539
hsa-miR-34a-5p,FAM175B,61.5891,98.9144579446071,84.3033225399475,96.2688
hsa-miR-34a-5p,TBCK,93.7817,97.5462556424007,97.1603598192004,96.4754
hsa-miR-34a-5p,MMAB,41.3869,94.8188506874508,99.5456250163266,96.4948
hsa-miR-34a-5p,MYO5A,32.5234,88.4062751566148,83.4335726325907,96.6053
hsa-miR-34a-5p,B3GAT1,43.9631,81.5651087462807,91.3798053199967,96.7008
hsa-miR-34a-5p,SEMA3E,99.9276,80.9455192820975,28.3742567049321,96.7124
hsa-miR-34a-5p,BMP3,67.341,74.2629929922007,99.6938803773253,96.7588
hsa-miR-34a-5p,NCKAP1L,24.4533,98.7279127148628,90.2147261128571,97.1533
hsa-miR-34a-5p,C2orf71,40.9592,76.4996459776446,83.0173313326167,97.343
hsa-miR-34a-5p,FOXN3,80.5848,99.0267057240094,74.8383190882256,97.3457
hsa-miR-34a-5p,PPP1R3E,72.0011,86.7062475690491,75.1595740421587,97.4551
hsa-miR-34a-5p,SIDT2,23.5103,91.6304731538598,98.3418082874668,97.4568
hsa-miR-34a-5p,HACE1,78.8895,97.3741237927342,14.5325040099439,97.5707
hsa-miR-34a-5p,EMR2,49.8907,86.8039425590015,5.8344142252686,97.5881
hsa-miR-34a-5p,E2F5,65.7638,99.9051474122445,2.26637474161312,97.8711
hsa-miR-34a-5p,XBP1,36.9223,99.4615080655292,58.5479375846768,97.8907
hsa-miR-34a-5p,TUFT1,59.4665,94.1043156959308,51.5553357818528,97.935
hsa-miR-34a-5p,RECK,55.9748,99.5400962265446,75.7591195621597,98.1014
hsa-miR-34a-5p,NAPEPLD,64.8566,98.2162570845132,2.26252855595944,98.1801
hsa-miR-34a-5p,KCNQ3,64.8258,94.1119599764987,93.6684170530683,98.347
hsa-miR-34a-5p,IL2RB,47.731,99.3082739307417,86.9862273736315,98.3906
hsa-miR-34a-5p,SLCO2A1,55.5037,98.1811259227545,87.6051744717763,98.4583
hsa-miR-34a-5p,CTCFL,60.2654,99.6527932139235,33.5762424918977,98.5009
hsa-miR-34a-5p,ZNF831,48.3313,99.0847155127159,70.2085748411939,98.5497
hsa-miR-34a-5p,VAMP2,16.1745,99.7222578060342,89.2976405554417,98.5669
hsa-miR-34a-5p,PEX5L,67.8776,90.9488387741455,72.4220087406866,98.6034
hsa-miR-34a-5p,ESYT3,47.9489,98.5542938318943,65.7730695331295,98.877
hsa-miR-34a-5p,SCN2B,70.0973,80.9930888578299,99.9322782532856,98.9111
hsa-miR-34a-5p,PLCXD3,96.298,95.9197200288051,75.3045739286108,98.9711
hsa-miR-34a-5p,C7orf41,47.8702,89.0284282042508,98.5164356176744,99.0352
hsa-miR-34a-5p,TNRC6B,82.9854,89.2242906270277,98.0828536649752,99.233
hsa-miR-34a-5p,BEST1,63.4837,99.9104139885223,92.980894958832,99.5417
hsa-miR-34a-5p,NFIC,81.2919,9.718250561084,8.01961213383623,0.66666
hsa-miR-34a-5p,GNB1L,12.459,5.25215515271755,7.78540174328037,0.725657
hsa-miR-34a-5p,SPRN,22.8579,33.3482165746281,3.97507881727035,0.893088
hsa-miR-34a-5p,TTYH3,63.1868,9.8198025436634,8.4706791353092,1.58905
hsa-miR-34a-5p,WASF2,21.5847,45.7870100515706,72.1108352563168,1.73835
hsa-miR-34a-5p,HIPK2,73.5586,13.7086192322664,43.8522004054379,1.99304
hsa-miR-34a-5p,NPTX1,21.2389,20.9381569182598,98.4907725017941,2.37901
hsa-miR-34a-5p,MFRP,19.6218,40.3565270770951,64.8538967964686,3.09957
hsa-miR-34a-5p,PLXNA1,4.26194,1.28820455754021,12.3198183445203,3.31827
hsa-miR-34a-5p,FOXK1,7.69551,0.192485617987031,44.7404198800804,3.58567
hsa-miR-34a-5p,PLXNA4,55.8797,27.2431858635179,17.339484429971,3.65042
hsa-miR-34a-5p,SLC7A1,82.3346,32.1556003765292,69.1822471096834,3.77041
hsa-miR-34a-5p,CYTH3,6.03379,3.90395035043644,40.2938223301138,3.91801
hsa-miR-34a-5p,SNPH,20.7316,44.1744076302157,82.2531480635768,4.7975
hsa-miR-34a-5p,CD276,0.356811,7.24268863675757,25.9439924483492,5.06838
hsa-miR-34a-5p,KIAA0513,49.3313,0.226772578548274,42.7141757670088,5.25562
hsa-miR-34a-5p,MNT,38.1817,16.0701907600398,21.993854766717,5.46917
hsa-miR-34a-5p,N4BP1,23.5269,0.872679434190025,54.4247346755427,5.60206
hsa-miR-34a-5p,FOXP4,47.6969,1.35047407705961,20.9104905960761,5.68433
hsa-miR-34a-5p,C10orf54,39.8769,11.7936843527076,81.1792877783053,5.71369
hsa-miR-34a-5p,BTBD9,14.6141,15.6384709146355,42.24817033798,5.84158
hsa-miR-34a-5p,ANTXR1,11.5853,46.4852573814552,68.158767918401,6.43842
hsa-miR-34a-5p,NPLOC4,15.9169,3.2154771665262,75.5175187193068,6.60275
hsa-miR-34a-5p,C22orf26,23.9438,20.0958687271785,35.8176629709592,6.67541
hsa-miR-34a-5p,NAA40,15.0341,40.1582714600979,53.9547911724657,6.84719
hsa-miR-34a-5p,SLC39A13,17.7716,45.6424580226763,6.1867930910954,7.36672
hsa-miR-34a-5p,SEPN1,26.8061,4.56585830400444,21.2624625275846,7.46699
hsa-miR-34a-5p,SLC46A1,34.1798,22.6758560161417,93.3972281472005,7.59964
hsa-miR-34a-5p,RP11-644F5.10,42.9649,2.4877989692071,74.4494867836266,7.8957
hsa-miR-34a-5p,SORCS2,16.1171,4.37170751851782,31.2155508768319,8.17308
hsa-miR-34a-5p,DENND5B,4.26605,49.5446580109969,28.9902633744543,8.80281
hsa-miR-34a-5p,CRISPLD2,25.643,9.65588035701811,11.3244832557686,8.8269
hsa-miR-34a-5p,SEC14L5,19.0929,2.31867991097008,32.6993777974273,9.00073
hsa-miR-34a-5p,TMEM201,14.8287,23.5400004987758,99.719792904562,9.03935
hsa-miR-34a-5p,PKNOX2,15.2909,13.6425082100503,18.675672954502,10.1331
hsa-miR-34a-5p,RGAG4,11.1509,4.76728935669855,15.1107445493445,10.2085
hsa-miR-34a-5p,SLC12A7,92.13,6.29826759071329,7.59201605369013,10.2763
hsa-miR-34a-5p,JMJD6,21.7894,36.6131995581652,73.8770483399902,10.3901
hsa-miR-34a-5p,UBN1,7.39368,16.3048399681093,3.30653823994606,10.4656
hsa-miR-34a-5p,CCDC97,15.8978,6.56071347857828,79.2650293642491,10.4857
hsa-miR-34a-5p,SMCR7L,31.93,7.25258670217372,43.4754317343396,10.7167
hsa-miR-34a-5p,ZFPM1,1.9779,67.414066126822,0.0000131269134937713,10.7755
hsa-miR-34a-5p,NOVA2,47.2517,16.8813519363265,62.2710321705207,11.3316
hsa-miR-34a-5p,PPP2R4,2.48085,47.2811067617108,29.3523824100934,12.0263
hsa-miR-34a-5p,PADI1,14.5892,46.0244087222558,8.23565487611672,12.5207
hsa-miR-34a-5p,MLL2,17.3051,47.3437248046604,31.3020572367558,13.1131
hsa-miR-34a-5p,RUNX3,10.7849,5.6505561581999,46.2935700308364,13.4612
hsa-miR-34a-5p,HEG1,11.6718,30.0461119732978,1.33964090277985,13.4893
hsa-miR-34a-5p,INPP5K,0.141872,47.8859807921767,87.1656854080048,13.5923
hsa-miR-34a-5p,COX10,36.1271,23.3489941691256,88.0403447810083,13.6778
hsa-miR-34a-5p,AL078633.1,1.03523,13.1134264081934,5.51565338489935,14.1977
hsa-miR-34a-5p,SIRT2,26.1916,32.8826899564996,42.6156845350651,14.5906
hsa-miR-34a-5p,COL18A1,9.50021,33.4576684216241,51.9178617518102,14.8811
hsa-miR-34a-5p,PPFIA4,16.0112,13.2306077303736,52.9993093930811,14.988
hsa-miR-34a-5p,PDE4C,42.6844,7.80721914394281,23.0757749768737,14.9973
hsa-miR-34a-5p,APLP2,1.38853,30.7488126581231,43.0416791317649,15.2018
hsa-miR-34a-5p,SENP5,28.261,8.07707696342223,96.6991194597698,15.3249
hsa-miR-34a-5p,GRIN1,12.4321,14.0217559168048,79.1959030377909,15.6959
hsa-miR-34a-5p,SPDEF,0.658049,32.1611922413418,0.0000131269134937713,16.0822
hsa-miR-34a-5p,TCF3,24.6925,3.3642424564427,49.2316620628393,17.0022
hsa-miR-34a-5p,LHX4,28.5179,1.74386409011298,24.5361178492287,17.291
hsa-miR-34a-5p,PCYT2,15.1997,16.5669683124046,44.2864518307253,17.5245
hsa-miR-34a-5p,WDR37,21.0373,10.9228249853194,85.8275147195363,17.5838
hsa-miR-34a-5p,ZNF592,37.9459,4.47835568814247,37.0377176918108,17.654
hsa-miR-34a-5p,CDHR1,20.2041,3.93159213092956,24.9077670240644,17.7665
hsa-miR-34a-5p,AMZ1,13.9285,29.9726587241533,19.2058296097749,18.182
hsa-miR-34a-5p,NOL9,20.2525,32.6577451897183,39.9075497736461,18.5283
hsa-miR-34a-5p,KLK10,23.4924,15.9943752965354,23.5677060600527,18.8968
hsa-miR-34a-5p,SLC43A2,14.5299,15.0317148576468,28.9491236275648,19.4109
hsa-miR-34a-5p,MTSS1L,31.798,12.1435786416787,42.2295169939053,19.4183
hsa-miR-34a-5p,C1orf115,28.5246,11.9664667794437,42.8829091130578,19.6543
hsa-miR-34a-5p,AC010536.1,19.0112,17.3366629454691,56.1216507828826,19.9125
hsa-miR-34a-5p,TFAP2A,8.77498,30.1657949192099,0.165504125329469,20.6742
hsa-miR-34a-5p,APOPT1,12.2924,13.9732956700843,42.4165098766241,20.9176
hsa-miR-34a-5p,RRAD,1.70184,57.8472838484794,14.7194181311817,21.7129
hsa-miR-34a-5p,KCNC2,15.191,17.8757667321839,57.7868128864809,22.0356
hsa-miR-34a-5p,CLASP1,22.6673,6.19356340733234,6.47495509611067,22.4055
hsa-miR-34a-5p,POFUT1,9.20154,34.6803738091922,99.9236276172932,22.5871
hsa-miR-34a-5p,ADCY7,65.1571,11.6447176936981,79.8308255896577,22.6345
hsa-miR-34a-5p,ARID3B,18.0286,29.0935587138835,7.48910105189896,22.7676
hsa-miR-34a-5p,HMG20A,41.3269,13.7941236471289,89.142178518935,22.7716
hsa-miR-34a-5p,ZBED1,19.0083,16.4523815535378,0.0000131269134937713,22.8089
hsa-miR-34a-5p,KHK,58.4334,22.2445543988536,78.33072129633,23.0317
hsa-miR-34a-5p,MOCS1,5.63885,29.053633418719,57.5898435495069,23.4853
hsa-miR-34a-5p,OPHN1,9.5833,5.54284692835458,24.2041644607982,23.6433
hsa-miR-34a-5p,C19orf6,1.1573,58.774325192807,0.0000131269134937713,24.4014
hsa-miR-34a-5p,TMEM132B,48.3793,2.08612184348138,70.1980339296584,24.5713
hsa-miR-34a-5p,MOB3A,37.5273,4.90258615228119,8.57942248669161,25.0519
hsa-miR-34a-5p,RP11-111H3.1,19.9643,14.2435020129939,3.66395784055447,25.4226
hsa-miR-34a-5p,MMP15,16.7314,13.1225112522726,13.3252349028352,25.4438
hsa-miR-34a-5p,ZXDB,60.3195,25.6919235658687,1.1135954524171,25.4984
hsa-miR-34a-5p,TLN2,27.912,4.35199658230179,60.9400287768198,25.7604
hsa-miR-34a-5p,EDNRB,41.0879,34.5631537621865,60.9159277636452,25.7767
hsa-miR-34a-5p,RP11-520P18.5,59.2843,51.3845519235628,4.64658607704422,25.8115
hsa-miR-34a-5p,SENP2,35.7327,4.43080160234034,95.4718711903236,26.21
hsa-miR-34a-5p,SLC30A7,42.2515,7.11763843002122,83.0653233283499,27.1833
hsa-miR-34a-5p,OTOF,7.85453,45.9205642300025,11.3641921690872,27.2569
hsa-miR-34a-5p,ACADSB,35.8729,18.531858216951,65.3446070766928,27.491
hsa-miR-34a-5p,TXN2,0.517932,35.9518957118761,10.9507731555144,27.8605
hsa-miR-34a-5p,ATF6,11.7809,6.51854214353062,12.482828356286,27.9658
hsa-miR-34a-5p,ARL17A,58.1216,41.0234770029525,0.0000131269134937713,29.5541
hsa-miR-34a-5p,RHOU,35.1514,17.3339212278186,0.50219632953121,29.8136
hsa-miR-34a-5p,ZNF562,43.5285,10.6762795108342,0.0000131269134937713,30.0372
hsa-miR-34a-5p,GPR133,51.8076,29.5391420468425,71.9264415024698,30.601
hsa-miR-34a-5p,BASP1,55.6706,60.2625667093208,4.61148471036187,30.8213
hsa-miR-34a-5p,KRT75,30.3094,36.3705343112023,41.6352091123883,30.8311
hsa-miR-34a-5p,RIC3,48.1822,25.5213639441204,93.6586243756019,30.9939
hsa-miR-34a-5p,VPS33A,54.1418,27.2756062874866,90.9101506090166,31.0994
hsa-miR-34a-5p,B3GAT3,2.00321,59.7096613947722,21.6876301287343,31.5185
hsa-miR-34a-5p,KRTAP5-2,9.44849,37.7464196188021,1.34006096401165,31.6715
hsa-miR-34a-5p,CTD-2117L12.1,13.623,31.5444219444602,1.90430821362792,31.7038
hsa-miR-34a-5p,ST6GAL1,39.3335,7.7550877837581,15.1427742182693,32.0851
hsa-miR-34a-5p,FSTL4,91.5845,36.8617509786151,13.8130966428313,32.1393
hsa-miR-34a-5p,XRRA1,62.3552,9.55223723385783,3.47541598204343,32.2092
hsa-miR-34a-5p,FAM193B,15.0642,35.8733152958259,77.6324745137693,32.2468
hsa-miR-34a-5p,KCNC4,33.2494,47.3139066889701,15.7236401403687,32.4923
hsa-miR-34a-5p,TRIM25,31.3604,31.9253580536097,61.0683706100484,33.2215
hsa-miR-34a-5p,ATP2B4,85.4375,7.95500856825491,48.2743556424791,33.2401
hsa-miR-34a-5p,PPP2R1A,22.7481,30.6614881764588,51.1479420215736,33.4517
hsa-miR-34a-5p,DAO,11.7593,43.3421259340622,20.2082926125538,33.7668
hsa-miR-34a-5p,RNF216,50.0639,78.4126446159248,62.9138177435702,34.1001
hsa-miR-34a-5p,SLC7A6,62.8462,33.4797880419907,3.9479848678192,34.1461
hsa-miR-34a-5p,MESP1,18.3871,28.3948002163014,36.9193654397509,35.3176
hsa-miR-34a-5p,GABRB3,18.1377,13.0674135704491,66.0255788410957,36.3911
hsa-miR-34a-5p,CSNK1G1,52.3529,45.5894127566081,96.1059142389862,36.4187
hsa-miR-34a-5p,SH3BP4,8.59929,19.204802745807,12.227746173275,36.4594
hsa-miR-34a-5p,AP2S1,0.407329,75.8038692916316,83.5922901436439,36.9948
hsa-miR-34a-5p,ANKS6,30.9461,14.5773100094225,37.2837554314245,37.1525
hsa-miR-34a-5p,POLR2J2,41.889,37.1694119728176,0.0000131269134937713,37.2889
hsa-miR-34a-5p,KIAA1147,16.6933,4.44870021671961,5.33912265223511,37.2984
hsa-miR-34a-5p,MCFD2,95.5676,44.2791737733176,74.1738741079114,37.5003
hsa-miR-34a-5p,XCR1,37.7186,2.12176417293764,65.8006491783799,37.6297
hsa-miR-34a-5p,DLG5,18.2601,24.1643686064345,14.3155030029784,38.4732
hsa-miR-34a-5p,ELAVL1,68.4343,6.16666514349019,98.01043248323,38.5564
hsa-miR-34a-5p,SCN5A,8.41164,31.5229451561981,27.3090601825665,38.6876
hsa-miR-34a-5p,CUX2,63.6541,19.156040445447,83.8807540676695,38.7699
hsa-miR-34a-5p,DPAGT1,49.8541,59.0250452034889,40.2296317231292,39.4012
hsa-miR-34a-5p,ALDH7A1,9.28937,52.2772366026432,28.2499842148865,40.0523
hsa-miR-34a-5p,MRPS27,25.5112,27.3834626716691,79.1029776171685,40.3428
hsa-miR-34a-5p,PARK2,38.8401,16.0443148315927,17.5268186124406,40.4962
hsa-miR-34a-5p,SPCS3,53.7137,23.8724686162396,16.4575396199785,41.0038
hsa-miR-34a-5p,COL23A1,42.4076,14.6944526067771,79.2185207097407,41.2451
hsa-miR-34a-5p,SPAG9,45.2603,13.0040675007788,8.89713317398135,41.3963
hsa-miR-34a-5p,ITPR1,34.291,50.7394970140836,63.8171200418171,41.5035
hsa-miR-34a-5p,FAM120C,71.0222,10.0258573405308,78.3762060515859,41.5652
hsa-miR-34a-5p,MRPL50,23.8488,40.5036736693027,15.3582131225291,41.5895
hsa-miR-34a-5p,CACNG5,12.6341,55.8066249502192,53.3524758737175,41.6366
hsa-miR-34a-5p,AQP1,23.8832,10.6734835784279,53.3027379984896,41.7091
hsa-miR-34a-5p,PTRF,70.5126,12.1976152632816,26.8740211424694,41.7183
hsa-miR-34a-5p,CARNS1,37.7677,13.5184648487788,50.0801463703362,41.8806
hsa-miR-34a-5p,C22orf39,25.7082,25.2588948213601,25.8713218552477,42.2558
hsa-miR-34a-5p,BCKDK,1.15073,65.3195564861217,9.46743193071825,42.3423
hsa-miR-34a-5p,DBNL,2.31749,57.1701725283919,80.774256862455,42.4555
hsa-miR-34a-5p,ATL3,29.3589,10.3303351540714,79.5988467743958,42.5385
hsa-miR-34a-5p,CNFN,29.3332,70.6592529795268,5.2483237915987,42.8146
hsa-miR-34a-5p,PIGV,59.78,72.2333706692285,2.03342453475265,42.8656
hsa-miR-34a-5p,RCOR1,33.4972,6.32656769324114,66.9762824239686,42.8788
hsa-miR-34a-5p,MAVS,32.6588,34.8819984860142,85.6462320441873,43.0063
hsa-miR-34a-5p,RPGRIP1L,31.2626,66.1882085384523,70.4035226334899,43.1917
hsa-miR-34a-5p,KRT85,68.6532,28.8849480785284,58.6234829718335,43.3081
hsa-miR-34a-5p,OTOP2,37.477,65.4971485361938,27.1975339255234,43.4317
hsa-miR-34a-5p,OPN5,55.9895,52.9530235336961,13.9077679429483,43.6383
hsa-miR-34a-5p,YPEL2,7.90768,10.9930021142206,8.17273757974108,43.689
hsa-miR-34a-5p,MSX2,23.5026,40.4095568532331,27.1039784130533,44.3449
hsa-miR-34a-5p,PAPLN,35.1218,20.6721638363724,48.4212064237339,44.9881
hsa-miR-34a-5p,FICD,40.6014,29.2223807186305,52.5556722246456,45.1922
hsa-miR-34a-5p,TPP1,97.4677,15.3337607521414,43.8809352190757,45.1962
hsa-miR-34a-5p,MGAT4B,0.844648,84.2732055032005,3.26970412068254,45.5425
hsa-miR-34a-5p,EAF1,32.2542,60.0336332855056,16.7311570048427,45.5492
hsa-miR-34a-5p,HUS1,21.1858,55.7940935966642,8.93946746999877,45.9746
hsa-miR-34a-5p,ATG12,81.6813,19.1629644442593,13.9732449874553,46.2947
hsa-miR-34a-5p,SHROOM3,79.0807,10.1904688290713,14.0406516882458,46.3208
hsa-miR-34a-5p,PPP2R2C,20.273,16.2007941067631,50.134347396152,46.5735
hsa-miR-34a-5p,NUP188,22.6426,68.5991309839343,13.0603862961849,46.9437
hsa-miR-34a-5p,MMP25,26.0521,54.8471476919926,1.86627954523646,47.0932
hsa-miR-34a-5p,RAB34,32.2539,45.7721087386906,73.3037041393228,47.3474
hsa-miR-34a-5p,LYPD6B,9.42552,50.7073399189288,9.00554835252641,47.4256
hsa-miR-34a-5p,NT5C2,45.4781,18.3998840114024,27.753681869514,47.6842
hsa-miR-34a-5p,ADAMTS5,29.1767,11.8261357565367,73.2456306740263,47.722
hsa-miR-34a-5p,DZIP1,70.5998,11.2737028848601,36.7493456561796,47.805
hsa-miR-34a-5p,PREX2,16.4852,10.5654258251525,36.975167949013,48.0154
hsa-miR-34a-5p,ZNF365,49.1704,24.149908756566,77.895340956482,48.125
hsa-miR-34a-5p,C12orf54,31.0571,65.7823956013555,81.5777421104953,48.2739
hsa-miR-34a-5p,TESK1,78.2596,55.5648968440351,87.589881617556,48.2918
hsa-miR-34a-5p,ZNF418,62.6634,32.5578041598827,8.45232771024491,48.3277
hsa-miR-34a-5p,YPEL4,29.0174,43.5998086683818,89.6775465588649,48.352
hsa-miR-34a-5p,VAMP1,12.3874,52.0351367381336,50.5349151614144,48.425
hsa-miR-34a-5p,XKR9,57.7496,53.1641512827134,35.8869993280333,48.6022
hsa-miR-34a-5p,GINS1,85.274,21.1027993866607,37.3268773422516,48.7423
hsa-miR-34a-5p,CCNL2,59.5108,33.991900625282,0.0000131269134937713,48.8009
hsa-miR-34a-5p,MYSM1,60.1529,11.9068692728887,32.800100604665,49.1323
hsa-miR-34a-5p,FAM222B,64.666,47.7545797140466,68.3671445432011,49.5645
hsa-miR-34a-5p,DPYSL3,37.0159,46.8907217951218,4.78495687218206,49.566
hsa-miR-34a-5p,PRKX,29.8559,39.912763810938,13.8791775253589,49.6558
hsa-miR-34a-5p,RICTOR,43.26,27.1496421748667,86.3876663721425,49.8114
hsa-miR-34a-5p,AL355149.1,13.73,48.5152979325435,0.0000131269134937713,50.2711
hsa-miR-34a-5p,LPCAT2,40.154,24.2176772013166,37.7086604943044,50.3141
hsa-miR-34a-5p,SLC30A4,62.4126,7.49097672839352,87.5292877848688,50.3604
hsa-miR-34a-5p,CTB-55O6.8,62.9546,53.3434627150409,61.4905715287485,50.4226
hsa-miR-34a-5p,ZFC3H1,32.6744,58.6494376303381,22.5592440578073,50.7665
hsa-miR-34a-5p,MOCOS,65.9325,44.8725465305887,37.3062024534989,51.1137
hsa-miR-34a-5p,ZC4H2,56.8689,31.7583998406396,6.32382494105688,51.19
hsa-miR-34a-5p,FEZ2,39.8424,57.4194442305973,92.7365112103185,51.2813
hsa-miR-34a-5p,C21orf128,25.8248,17.056465597562,33.5148741713144,51.4045
hsa-miR-34a-5p,INSRR,10.1963,40.2791936004283,61.75606335416,51.4266
hsa-miR-34a-5p,HAS3,5.37084,79.9016838638454,0.91358067151251,51.7003
hsa-miR-34a-5p,PARP11,55.3131,22.7024599713096,63.7153864622404,52.068
hsa-miR-34a-5p,KIAA1009,89.5769,68.3527713886118,38.7420242514476,52.3431
hsa-miR-34a-5p,TNP1,49.8515,74.3594952575255,83.6062309257743,52.4376
hsa-miR-34a-5p,SYNDIG1L,46.5062,39.8748986764939,39.4716181034314,52.6597
hsa-miR-34a-5p,PXDN,51.0673,15.251981665499,4.93705841883439,52.7661
hsa-miR-34a-5p,LIG3,57.9421,51.2232243002308,45.8315420565962,52.7907
hsa-miR-34a-5p,FAM86A,46.7263,22.2414486678428,5.86103560583397,52.8146
hsa-miR-34a-5p,BDKRB2,30.3496,43.6066552175429,46.642299614712,52.9936
hsa-miR-34a-5p,WDR35,25.4317,23.5666741586296,33.7288034805224,53.0803
hsa-miR-34a-5p,PTPLAD2,34.1656,44.017362972592,45.4067026282837,53.142
hsa-miR-34a-5p,DGCR6L,5.96729,63.8187913610181,0.0000131269134937713,53.2029
hsa-miR-34a-5p,ANKRD13B,58.5066,36.7668209412084,49.528343434712,53.2878
hsa-miR-34a-5p,ALG1,15.16,39.4537352185405,0.0000131269134937713,53.2986
hsa-miR-34a-5p,EPM2AIP1,82.7957,8.57796709226283,2.31669020103474,53.9718
hsa-miR-34a-5p,DNAJC27,46.9708,47.3331451823142,76.2649389198152,53.9721
hsa-miR-34a-5p,XKR6,96.3949,37.0101987249619,79.8788438392179,54.2769
hsa-miR-34a-5p,SP2,41.8902,46.8267793631377,71.1074927503338,54.4159
hsa-miR-34a-5p,OSCAR,29.3655,54.7100075947128,13.8476598060604,54.431
hsa-miR-34a-5p,UQCRB,52.9048,7.52015975694441,7.22120700131807,54.4864
hsa-miR-34a-5p,ITGA9,52.4939,36.5766743026859,21.3687380192301,54.7106
hsa-miR-34a-5p,LNX2,70.5397,35.9802810090202,50.4756340200766,54.9472
hsa-miR-34a-5p,GJC1,84.3041,3.64009487892064,71.9444910085237,55.0252
hsa-miR-34a-5p,COL22A1,38.6419,45.955339123366,54.8526458016127,55.0572
hsa-miR-34a-5p,PDE6A,64.0133,8.34003401898477,41.7629077268557,55.2307
hsa-miR-34a-5p,C17orf102,92.5597,30.1698532809299,31.7345102748946,55.3863
hsa-miR-34a-5p,C1orf112,55.3661,48.6073158630672,95.9919988836873,55.5253
hsa-miR-34a-5p,SPSB3,64.1748,50.5868902214704,87.6823344692927,55.603
hsa-miR-34a-5p,LILRA4,79.3841,73.3851166864189,0.0000131269134937713,55.9125
hsa-miR-34a-5p,SPRR2F,40.6886,69.395932994899,17.8110425434077,56.1067
hsa-miR-34a-5p,DCLK3,56.5063,16.3177198450945,0.0000131269134937713,56.1088
hsa-miR-34a-5p,POC1B-GALNT4,43.7833,26.1016477103482,69.9799040081324,56.4643
hsa-miR-34a-5p,CACNA2D4,73.893,13.3380458864399,65.2159370706269,56.5174
hsa-miR-34a-5p,DNAJC10,40.8982,34.2078225077051,83.8847840301121,56.8492
hsa-miR-34a-5p,CCDC149,30.745,55.4730880275696,73.1234584901398,56.9603
hsa-miR-34a-5p,CITED2,52.9037,57.4376061737905,10.3452155091332,57.4417
hsa-miR-34a-5p,PCBP4,2.10126,58.0850232976296,57.1934501427355,57.7473
hsa-miR-34a-5p,ARHGEF3,57.1124,32.832053374582,92.7564772457425,58.032
hsa-miR-34a-5p,MAPK4,45.1596,15.4420431094052,98.1281677703557,58.0704
hsa-miR-34a-5p,RAB10,48.3935,27.2886255738438,0.0000131269134937713,58.3921
hsa-miR-34a-5p,GTPBP10,76.3442,11.9602785523173,3.277160207547,58.5986
hsa-miR-34a-5p,RPP25L,25.6911,59.6576694439595,29.434438746343,58.7513
hsa-miR-34a-5p,MAST3,25.0215,47.3599427616098,0.921732484792142,58.9768
hsa-miR-34a-5p,CCND1,65.5546,13.6189635161026,96.5566924483623,59.1094
hsa-miR-34a-5p,CYP27B1,48.6375,43.9514533194688,23.1539457467291,59.1501
hsa-miR-34a-5p,DPH1,36.4941,34.612287820872,54.6308797250489,59.2026
hsa-miR-34a-5p,ZNF148,77.4748,14.6891240707784,79.0971492675773,59.2322
hsa-miR-34a-5p,ATOH1,44.1277,82.5337947680282,3.2074169161546,59.2523
hsa-miR-34a-5p,HTR5A,43.9464,45.5597805200806,70.9266038823897,59.5508
hsa-miR-34a-5p,C15orf52,28.9475,41.0493916562252,86.3203515597464,59.8727
hsa-miR-34a-5p,EARS2,31.8274,56.5606824987178,39.6605406424338,59.9662
hsa-miR-34a-5p,CERS2,38.6375,39.9177283335763,88.6303339079858,60.0029
hsa-miR-34a-5p,EIF1AD,52.4616,43.3048494169668,18.6299912955437,60.1389
hsa-miR-34a-5p,EIF2S2,47.9881,71.1509653247069,89.0995029231667,60.2979
hsa-miR-34a-5p,C22orf34,83.6941,50.600203816502,33.414374521606,60.3499
hsa-miR-34a-5p,KIAA0556,26.8158,48.9997377554812,29.6051280025025,60.5125
hsa-miR-34a-5p,GPR139,77.9184,84.1637536562044,22.0671817054932,60.5565
hsa-miR-34a-5p,DPH3,47.2616,21.7043585720577,25.8636819915943,60.8259
hsa-miR-34a-5p,NANP,60.6412,23.211807602055,1.18142221443942,60.9249
hsa-miR-34a-5p,C6orf47,83.7939,57.4610501831917,32.0244706670585,61.1262
hsa-miR-34a-5p,CENPI,55.1603,59.5172687163665,4.51938628528957,61.1816
hsa-miR-34a-5p,RALA,84.1358,35.7857971900337,2.72958413806783,61.2001
hsa-miR-34a-5p,NIPSNAP3B,65.2702,80.3344725144354,57.1910216637391,61.2149
hsa-miR-34a-5p,CYB5RL,10.2799,42.4841309537289,21.3874569978723,61.2843
hsa-miR-34a-5p,C11orf1,35.9479,30.7643258232472,33.1648975306569,61.4811
hsa-miR-34a-5p,FNBP1L,68.4307,25.5824717188726,2.34663269071403,61.5129
hsa-miR-34a-5p,TMEM57,70.9793,46.9847456716101,82.5217378405729,61.7233
hsa-miR-34a-5p,FAM156A,20.4933,45.0798017970488,0.0000131269134937713,61.7691
hsa-miR-34a-5p,JPH4,17.0543,24.8799724031403,28.6576798941761,61.775
hsa-miR-34a-5p,DEFB134,14.9794,37.0344017409442,24.7925521043296,61.8594
hsa-miR-34a-5p,FLRT3,96.5619,22.9492997544691,84.9735039814585,61.8776
hsa-miR-34a-5p,NUDT13,34.6771,61.753418279078,86.5580930900321,62.1458
hsa-miR-34a-5p,ELAVL2,46.1966,42.9823180897446,13.5953211479696,62.1541
hsa-miR-34a-5p,SPINK5,68.3236,77.9932547549826,22.0407703555438,62.2216
hsa-miR-34a-5p,DLG2,60.0823,25.5103970735185,56.9459946964644,62.4833
hsa-miR-34a-5p,AL136115.1,93.0334,94.1849795075968,85.6297315139256,62.5156
hsa-miR-34a-5p,GNPNAT1,23.3132,57.8368513804703,47.9044786009651,62.7346
hsa-miR-34a-5p,AL137145.2,51.3997,42.9915733230563,19.3735653103983,62.9091
hsa-miR-34a-5p,PRY,26.3321,78.0058945380492,3.32696371734237,63.0332
hsa-miR-34a-5p,DHCR24,42.4046,47.1540196291494,93.5162498718485,63.2132
hsa-miR-34a-5p,ANP32A,16.7299,36.098244572677,97.5855930549176,63.4332
hsa-miR-34a-5p,FXC1,31.3807,56.0672894961079,67.4438105749628,63.584
hsa-miR-34a-5p,LOX,87.9172,29.5795088050185,42.178413919674,63.8308
hsa-miR-34a-5p,AC093726.4,23.8709,57.3543632887414,33.4311638439646,64.0193
hsa-miR-34a-5p,TRIB2,72.0042,28.6165772923509,76.9293839001294,64.3952
hsa-miR-34a-5p,FSTL5,57.3519,52.4742375352919,13.7320642058342,64.5311
hsa-miR-34a-5p,C12orf73,53.3182,39.5931523355639,67.4301979656697,64.5385
hsa-miR-34a-5p,KLHL12,20.4732,46.1571806592112,85.2808444070882,64.6473
hsa-miR-34a-5p,TM9SF3,72.8166,28.7757208355206,94.8440896793975,64.7397
hsa-miR-34a-5p,ATP1A2,65.3331,57.3595833952285,70.351526929141,64.8394
hsa-miR-34a-5p,CADPS,79.6754,51.250463342538,4.82756683338284,64.9066
hsa-miR-34a-5p,ITGB6,60.159,45.9597460085161,62.0942257726731,64.913
hsa-miR-34a-5p,HRK,36.7936,46.0919990328088,83.3469612573588,65.1253
hsa-miR-34a-5p,RNF19A,57.6707,42.9160599131913,68.2420975652595,65.1385
hsa-miR-34a-5p,EPN2,46.7391,43.5440449195585,94.0566717734736,65.2685
hsa-miR-34a-5p,AL161915.1,13.4602,61.2695515835588,51.7065972060415,65.7799
hsa-miR-34a-5p,LRRC18,49.9552,44.9729212784707,8.7440339819035,65.8368
hsa-miR-34a-5p,TMEM87A,55.7746,55.4056061465282,90.1294274289745,65.8517
hsa-miR-34a-5p,AL645728.1,2.46203,88.153525965073,0.0000131269134937713,66.1002
hsa-miR-34a-5p,C10orf32,43.2964,48.6033426959635,5.873611188961,66.3535
hsa-miR-34a-5p,FIGN,38.4426,39.8417966955951,73.5102823769742,66.5541
hsa-miR-34a-5p,ZBTB4,16.8505,52.5872210863801,1.0636606734868,66.761
hsa-miR-34a-5p,LRP2BP,57.4777,23.7679812918819,18.1377976740947,66.893
hsa-miR-34a-5p,DNM3,37.9144,64.9752772968585,4.88296240832656,67.4788
hsa-miR-34a-5p,OTX1,87.9063,54.6987154355761,91.4370911704836,67.5614
hsa-miR-34a-5p,C21orf62,84.4384,13.4649703747339,63.3602115638394,67.6709
hsa-miR-34a-5p,SEMA6C,6.54399,85.6050142143345,0.866481305896859,67.7412
hsa-miR-34a-5p,C2orf49,72.5422,19.9522615840281,98.612262086179,67.7882
hsa-miR-34a-5p,IQGAP3,70.3066,69.3165161226164,49.0297701333051,67.8916
hsa-miR-34a-5p,SENP6,81.6032,50.7868729656881,8.30405922233277,67.9894
hsa-miR-34a-5p,REEP5,55.1379,30.9745241764508,20.5603301786297,68.002
hsa-miR-34a-5p,MTMR6,78.6627,36.1992156828728,49.6775964411362,68.2783
hsa-miR-34a-5p,NMNAT3,56.458,55.7609141661143,4.10168789791777,68.4009
hsa-miR-34a-5p,TGFBRAP1,46.4074,35.8881856288455,99.2290432435973,68.4779
hsa-miR-34a-5p,CEMP1,52.7803,66.2020178112512,50.6746905362961,68.5179
hsa-miR-34a-5p,ZC3HAV1,43.1455,52.1863416920611,6.33934095280651,68.5356
hsa-miR-34a-5p,YTHDC1,80.1019,24.4665616552663,4.43133094957336,68.586
hsa-miR-34a-5p,POLR2G,40.234,82.1412334662421,10.9998284312406,68.6905
hsa-miR-34a-5p,MED13,66.0653,29.5072560254667,61.5787843874267,68.7347
hsa-miR-34a-5p,PTK6,10.0756,58.3558647276785,66.1564541686286,68.7744
hsa-miR-34a-5p,PDE4A,87.0244,82.6411787093387,0.0000131269134937713,68.9825
hsa-miR-34a-5p,FDFT1,58.4246,75.7068248787487,14.8085892545449,69.1889
hsa-miR-34a-5p,LRAT,43.2005,53.1375008577549,23.6148054256684,69.2169
hsa-miR-34a-5p,TMEM11,54.1938,72.7419283135323,76.2276584854929,69.2789
hsa-miR-34a-5p,TMCO1,87.5469,29.801216176382,2.93101662562975,69.3654
hsa-miR-34a-5p,SHC4,63.6542,38.8864707386699,50.5054714944479,69.5075
hsa-miR-34a-5p,TTPAL,77.0706,36.7296528536246,65.6069090621254,69.5218
hsa-miR-34a-5p,ADAM12,64.323,52.1339470030625,95.2415332392484,69.5446
hsa-miR-34a-5p,CALML5,74.6276,96.3081919890108,44.4914548387575,70.0025
hsa-miR-34a-5p,SMYD1,37.066,51.5642273692507,63.8172381840385,70.3639
hsa-miR-34a-5p,INHBB,69.4266,17.6449203019855,93.7844327145263,70.4317
hsa-miR-34a-5p,CBY1,14.3923,73.4804726969068,8.48914870259494,70.4351
hsa-miR-34a-5p,PLAGL2,86.4576,32.4944658351775,62.8633578881001,70.5055
hsa-miR-34a-5p,MCPH1,49.2586,57.982983382248,54.5171350196254,70.5871
hsa-miR-34a-5p,CCL18,35.1288,45.947416024054,0.0000131269134937713,70.612
hsa-miR-34a-5p,PLEKHA6,31.5633,81.4484308468329,41.7590090335481,70.764
hsa-miR-34a-5p,CGA,75.4479,75.4862327823617,2.17813562910799,70.8973
hsa-miR-34a-5p,FOXP3,74.4471,30.8442228833669,58.2733356813006,71.0688
hsa-miR-34a-5p,C1QC,55.9787,59.5622127489251,35.7641707984721,71.1303
hsa-miR-34a-5p,MTRF1L,74.1524,20.0200532636741,48.2636572079816,71.239
hsa-miR-34a-5p,STARD3,2.92733,63.8721231907955,67.8779438580288,71.4372
hsa-miR-34a-5p,C4orf45,90.9025,69.5767856752843,81.2599526617246,71.5021
hsa-miR-34a-5p,TSPYL4,47.3239,44.7505091152818,39.626279398215,71.5229
hsa-miR-34a-5p,SYNRG,26.5269,38.2695377975209,46.5043488808059,71.7129
hsa-miR-34a-5p,WDR3,34.2516,52.7380078121914,69.3606024833232,71.7157
hsa-miR-34a-5p,RFC5,58.7794,76.4135606903986,1.68835735974188,71.8095
hsa-miR-34a-5p,IQCJ,75.4261,73.7929045896199,69.7969017071157,72.165
hsa-miR-34a-5p,C2orf88,88.0665,77.0824623474649,24.7381935555519,72.3706
hsa-miR-34a-5p,RAE1,8.57668,70.3451946441398,14.5680910724255,72.4957
hsa-miR-34a-5p,FRMD3,34.0217,78.6188310771992,5.24380813335684,72.5154
hsa-miR-34a-5p,MTAP,32.57,57.4190492373765,36.0670086927734,72.5411
hsa-miR-34a-5p,SCUBE1,19.8407,66.7775461688988,8.10886201868039,72.8475
hsa-miR-34a-5p,ABCC4,57.4316,47.2557962157171,4.45513004373756,73.1511
hsa-miR-34a-5p,PTPRZ1,57.9062,78.8776290864953,2.52286150436791,73.2894
hsa-miR-34a-5p,DHCR7,33.8654,61.7381529528377,10.1409476082567,73.3027
hsa-miR-34a-5p,SLC6A12,39.4309,53.7140515507976,30.8395173128893,73.6095
hsa-miR-34a-5p,GPR84,74.1099,87.964022158655,28.3768427068903,73.7362
hsa-miR-34a-5p,ATXN7L3,8.00574,98.0368682025345,0.314849020148106,73.859
hsa-miR-34a-5p,GRB10,32.6435,46.2150355486154,96.7518240174472,74.1215
hsa-miR-34a-5p,RIMS4,26.6528,67.7800389633705,42.2208269771724,74.1239
hsa-miR-34a-5p,HRH4,35.6615,71.1661841811566,51.6025532896898,74.2684
hsa-miR-34a-5p,FATE1,85.3717,66.2623123646664,5.24800874567485,74.5575
hsa-miR-34a-5p,BRIP1,77.2958,49.5120981776562,58.9276466843976,74.6685
hsa-miR-34a-5p,DDB1,21.3336,94.9610947167411,56.0908287899992,75.1349
hsa-miR-34a-5p,LIN28A,43.4401,41.9374371012021,88.0278873401027,75.2849
hsa-miR-34a-5p,TMEM155,52.5902,43.1330893256258,89.9297539478208,75.3362
hsa-miR-34a-5p,ACOT11,44.5949,35.4258189564837,39.7218039477092,75.3386
hsa-miR-34a-5p,TOX2,50.6603,64.5534632618354,12.2501800684359,75.8522
hsa-miR-34a-5p,TMEM25,53.9086,64.1613434230608,51.6719159005909,75.9738
hsa-miR-34a-5p,B3GALT5,34.9048,73.1916164780019,0.0000131269134937713,76.0729
hsa-miR-34a-5p,COMMD3,40.0348,89.091023012305,14.9287792744939,76.2285
hsa-miR-34a-5p,LPIN1,28.7066,55.3824487008363,71.9225559360756,76.2725
hsa-miR-34a-5p,MYCBP2,92.0872,66.9545805814827,53.2776655937165,76.2927
hsa-miR-34a-5p,NRIP2,66.4255,40.4659247093353,70.0175519960325,76.3523
hsa-miR-34a-5p,TMPRSS5,48.7391,65.8859225500391,3.58036565542613,76.3591
hsa-miR-34a-5p,TMPRSS15,69.7601,80.1068789695851,3.64533075030681,76.4166
hsa-miR-34a-5p,SEPT1,48.9834,85.2222812732785,93.324505046445,76.421
hsa-miR-34a-5p,MEGF10,57.6829,73.6243121890106,49.1129028764612,76.5001
hsa-miR-34a-5p,ANGPTL3,81.355,76.1747834159231,17.3003005931921,77.0646
hsa-miR-34a-5p,MAP7,98.0666,72.3006047113862,1.51113090066248,77.2422
hsa-miR-34a-5p,C10orf76,39.2512,54.2806577086335,88.1854234289415,77.2797
hsa-miR-34a-5p,PPP4R1L,24.4111,65.3090310785313,72.6371588528495,77.3227
hsa-miR-34a-5p,BEST4,84.4326,83.4533699659857,9.28423272599918,77.5809
hsa-miR-34a-5p,TGS1,28.5328,88.5170281577501,42.2368155578078,77.6239
hsa-miR-34a-5p,RP11-368I7.4,94.6637,61.1175953680152,30.7286736553479,78.1325
hsa-miR-34a-5p,DCLRE1B,50.9517,79.0802838436775,58.7547783605981,78.2529
hsa-miR-34a-5p,ZNF329,23.1959,60.0534216713728,18.0674111639411,78.4147
hsa-miR-34a-5p,PANK3,86.5547,20.8016054383286,88.5408739925258,78.4616
hsa-miR-34a-5p,FAM219A,40.0229,58.9203797449335,97.8387587085585,78.5181
hsa-miR-34a-5p,GEMIN5,95.576,66.0516570585211,11.3464183282167,78.6351
hsa-miR-34a-5p,MARVELD2,81.7555,72.5279968871436,46.2636669218976,78.9207
hsa-miR-34a-5p,FERMT3,41.2582,63.5652909078602,45.8895498873251,79.0133
hsa-miR-34a-5p,MARCH9,17.4531,70.3984567692312,67.7245164931136,79.0286
hsa-miR-34a-5p,EFTUD2,37.7335,48.49880115685,92.8827581535526,79.3495
hsa-miR-34a-5p,ZNHIT1,31.7993,87.7091508466718,3.09543121713923,79.3791
hsa-miR-34a-5p,HES6,12.8438,76.0249028510301,66.5771061115365,79.4381
hsa-miR-34a-5p,WNT2B,39.5563,58.5758836966471,62.5425623761394,80.2513
hsa-miR-34a-5p,AC106722.1,51.3079,97.8093366174051,32.5676754743443,80.501
hsa-miR-34a-5p,CDH9,71.6764,89.4844594951491,66.078729713832,80.5383
hsa-miR-34a-5p,C7orf13,54.4288,69.5672438782634,74.3608013560627,80.5681
hsa-miR-34a-5p,SLC37A3,13.8554,73.1884023174794,79.8454358443762,80.5783
hsa-miR-34a-5p,ZDHHC22,40.3833,38.2987440609671,59.8672448984548,80.649
hsa-miR-34a-5p,PVR,22.7102,57.8025411850137,59.3775716443966,80.6785
hsa-miR-34a-5p,ARHGAP19,85.5509,37.9140051739465,85.3145937016806,80.807
hsa-miR-34a-5p,TLK1,71.9645,84.8383943324204,76.5484277436267,80.8199
hsa-miR-34a-5p,SLC35D1,45.4823,62.8692431480681,68.3608830054646,80.8654
hsa-miR-34a-5p,SRPR,35.4989,59.5554823742407,37.7836282972674,80.8776
hsa-miR-34a-5p,NDRG1,71.4356,74.6397700550837,53.5055225581414,80.911
hsa-miR-34a-5p,LYPD3,24.112,79.558682593826,12.0108108008769,80.9483
hsa-miR-34a-5p,RRP8,74.4987,38.1981137292363,29.6313687025766,80.9978
hsa-miR-34a-5p,PREPL,58.9422,80.578129116933,73.5830317315567,81.015
hsa-miR-34a-5p,TMEM59L,25.2131,78.0068549137234,54.3273723581594,81.234
hsa-miR-34a-5p,LRRC58,91.1595,40.0281018314209,4.41553927264035,81.5254
hsa-miR-34a-5p,HLA-DQA1,66.8526,86.1882797921313,0.0000131269134937713,81.5507
hsa-miR-34a-5p,RHOV,12.5919,87.55460781278,99.038952409294,81.5735
hsa-miR-34a-5p,ZNF512B,38.9912,61.9612853977822,47.6896304078125,81.9225
hsa-miR-34a-5p,CALCOCO2,55.4533,61.6209638856924,64.8164850930114,82.1932
hsa-miR-34a-5p,NR1I2,44.8747,59.823434932302,6.90844516041548,82.2376
hsa-miR-34a-5p,POMZP3,26.7179,83.7988418798765,0.834438510058563,82.3306
hsa-miR-34a-5p,CARHSP1,44.7418,47.4987557713544,2.50661038546263,82.4836
hsa-miR-34a-5p,CRABP2,56.3583,82.2171418693279,37.6221803882075,82.7019
hsa-miR-34a-5p,PLA2G4D,7.83698,79.4753932389862,93.3796643369458,82.9238
hsa-miR-34a-5p,KIR2DL1,39.668,81.3168593794703,0.0000131269134937713,82.9341
hsa-miR-34a-5p,UACA,26.1011,83.8608325806518,34.1059397051984,82.9694
hsa-miR-34a-5p,CNNM3,45.1339,81.3911800647076,98.472053523152,83.1959
hsa-miR-34a-5p,KRTAP10-7,65.8732,69.6840921669437,13.8321963019647,83.336
hsa-miR-34a-5p,WISP2,25.7624,65.6042071889696,16.7753947033167,83.3776
hsa-miR-34a-5p,BAX,66.6236,68.1527499195685,3.39448856035433,83.4462
hsa-miR-34a-5p,FAM86B1,37.9783,72.2738458569161,0.0000131269134937713,83.4991
hsa-miR-34a-5p,AAGAB,14.2203,74.5696161610779,97.7844264136078,83.6375
hsa-miR-34a-5p,SEMA4B,75.5298,48.8100713047958,96.98932926329,83.7875
hsa-miR-34a-5p,RTN4RL1,41.3509,75.4646398196229,94.1533383644417,83.855
hsa-miR-34a-5p,MAGEA2,5.93738,94.4467748183922,21.9189263444946,84.4696
hsa-miR-34a-5p,TAB2,57.7048,75.1790055062055,23.3032118800667,84.5554
hsa-miR-34a-5p,C2orf44,30.6288,66.1031843114269,66.353725424613,84.7316
hsa-miR-34a-5p,SOCS6,62.5497,84.4467314465875,2.06386584714471,84.7638
hsa-miR-34a-5p,SERPINF2,58.8816,72.8031290278659,94.1753128176303,84.8039
hsa-miR-34a-5p,KNG1,49.2753,87.1746010994443,8.70998276830066,84.903
hsa-miR-34a-5p,PDLIM2,19.7919,79.9296044630826,12.5559190106193,84.9338
hsa-miR-34a-5p,SNX20,47.4492,83.7102394789683,16.1552661829574,85.0859
hsa-miR-34a-5p,GNL1,72.3331,45.0411854009886,11.7196427326716,85.3888
hsa-miR-34a-5p,HLX,37.8397,77.8932904902516,53.6505486984206,85.534
hsa-miR-34a-5p,RPL13A,25.1287,82.6889961239548,50.6252020724246,85.6524
hsa-miR-34a-5p,PLA2G12A,90.1022,51.4376591493519,17.865204188483,85.6654
hsa-miR-34a-5p,C3orf43,36.6765,80.8352619587296,0.0000131269134937713,85.9379
hsa-miR-34a-5p,CSNK1G3,53.5743,80.6596758546221,1.57673921430435,85.9859
hsa-miR-34a-5p,SYT5,59.3945,44.573683816756,30.9928134086696,86.0363
hsa-miR-34a-5p,PARD6B,44.9636,65.0067296001879,8.50031970597814,86.2522
hsa-miR-34a-5p,RAPGEF5,6.48228,87.7543582080443,12.8781716099779,86.608
hsa-miR-34a-5p,BCO2,53.336,90.832447438407,12.9005267436578,86.614
hsa-miR-34a-5p,TAF3,94.7784,87.9282171849313,73.227252995135,86.9951
hsa-miR-34a-5p,KIAA2022,79.7824,32.2051836431913,39.9864556506571,87.0294
hsa-miR-34a-5p,PSD3,54.2179,42.8885033273145,51.5096278690674,87.0749
hsa-miR-34a-5p,CTDSPL,75.5183,54.2010627021533,94.2096134425895,87.1763
hsa-miR-34a-5p,PPP1R15B,82.8163,80.8552439687246,0.379446561450955,87.2529
hsa-miR-34a-5p,UBP1,40.0159,73.1068555797904,97.4054261672156,87.3411
hsa-miR-34a-5p,SAMHD1,50.8435,91.8277296703572,48.2380597266688,87.411
hsa-miR-34a-5p,CHCHD7,39.4536,88.1165127767915,79.7273198767593,87.4471
hsa-miR-34a-5p,PIK3C2A,64.5143,70.3723872166563,69.5417145087968,87.5579
hsa-miR-34a-5p,ZNF154,85.8224,81.4218578715256,16.1716223171706,87.607
hsa-miR-34a-5p,MYO15A,29.2256,65.2918295110123,75.5711684147559,87.6165
hsa-miR-34a-5p,FAM117B,57.7155,58.9040998282631,93.7895522107888,87.7127
hsa-miR-34a-5p,ZEB1,60.4701,75.8744104338931,24.6362105646187,88.3738
hsa-miR-34a-5p,EEA1,89.4272,56.4946334362226,69.9446188646611,88.6466
hsa-miR-34a-5p,FAM122A,84.6693,77.100755955065,47.1662078591619,89.0318
hsa-miR-34a-5p,COMMD9,68.273,82.4003180392475,67.2405140656847,89.0706
hsa-miR-34a-5p,ANGEL1,46.1221,57.7968951054454,41.3760575861943,89.0744
hsa-miR-34a-5p,PACS1,47.3783,78.6280708205806,0.0000131269134937713,89.1897
hsa-miR-34a-5p,KIAA1919,86.0065,80.9976583872473,85.2642651153455,89.4222
hsa-miR-34a-5p,COL9A1,61.6452,81.6623932530821,72.567730607381,89.4463
hsa-miR-34a-5p,PDE7B,85.0639,53.8663795246667,91.2655486649469,89.4498
hsa-miR-34a-5p,ZNF449,59.3136,83.3302405105977,24.9325768905676,89.4778
hsa-miR-34a-5p,ZBTB47,1.68306,86.4795137153264,15.8846679881968,89.9593
hsa-miR-34a-5p,AHCYL2,19.6316,51.2327118824959,97.6760768696302,89.9987
hsa-miR-34a-5p,LDOC1L,81.9781,55.9740943308869,96.465709810937,90.1204
hsa-miR-34a-5p,MRPL30,75.4702,72.8022693367382,67.0211895950308,90.1628
hsa-miR-34a-5p,ATP6V1E1,29.9984,85.7920086520554,5.29523938042543,90.2782
hsa-miR-34a-5p,RDH12,40.7879,75.4014951190455,18.8156714869131,90.4581
hsa-miR-34a-5p,KLF17,91.6014,66.8730880585495,0.0000131269134937713,90.4883
hsa-miR-34a-5p,LEPROTL1,79.7804,75.6393429977073,13.1800118588536,90.4891
hsa-miR-34a-5p,CLIP3,96.7749,78.2450125909898,90.7827932943,90.5299
hsa-miR-34a-5p,NCBP2,40.4859,84.7115240588822,87.3723555340508,90.5803
hsa-miR-34a-5p,PPIG,81.9226,96.5293494678512,50.2920147541257,90.6103
hsa-miR-34a-5p,NUP43,87.0099,59.7367765176375,56.3833358033809,90.6824
hsa-miR-34a-5p,SEMA4C,13.8134,98.0016595911247,94.2572641385719,90.7786
hsa-miR-34a-5p,PPARG,88.998,97.8908291403383,4.5686384647182,90.8116
hsa-miR-34a-5p,VTCN1,48.9654,74.3685568667093,92.229681080324,90.8514
hsa-miR-34a-5p,DNMBP,82.9946,62.9209253002762,7.779862185786,91.1165
hsa-miR-34a-5p,RPS6KA4,0.578993,96.9396157598887,12.2242544142857,91.1794
hsa-miR-34a-5p,GMNC,98.4079,70.0589329885481,93.6924261778484,91.2611
hsa-miR-34a-5p,MCIN,51.2325,91.2976565129658,66.8609099812718,91.6336
hsa-miR-34a-5p,TSSC4,3.9387,98.9180283735248,89.1655706787809,91.736
hsa-miR-34a-5p,PLEKHH2,51.3467,69.1719331138617,93.2185971083772,91.9736
hsa-miR-34a-5p,BCORL1,14.8373,97.543227361041,14.2812286318461,92.0162
hsa-miR-34a-5p,PLN,74.6691,90.6648696282277,32.4452276252744,92.0999
hsa-miR-34a-5p,AC133485.1,49.8654,96.9495757850258,0.0000131269134937713,92.2412
hsa-miR-34a-5p,DPYSL4,12.4967,92.0498862496974,0.0000131269134937713,92.348
hsa-miR-34a-5p,VIL1,56.5159,98.0511731531008,33.6713469801601,92.3943
hsa-miR-34a-5p,PRKAA2,64.9319,76.569025375139,94.0411688886374,92.4273
hsa-miR-34a-5p,C6orf120,65.5805,65.4941744695899,81.3025626229254,92.4607
hsa-miR-34a-5p,HERC6,67.1554,76.6748370885313,4.77469162582993,92.4639
hsa-miR-34a-5p,ACTR8,85.9099,80.8750943143127,36.3299801507941,92.7392
hsa-miR-34a-5p,STMN3,13.8331,83.9492026326066,43.8057967662374,92.758
hsa-miR-34a-5p,MEX3C,61.9018,86.0819414211113,41.6266241109634,92.9371
hsa-miR-34a-5p,JAG1,62.6871,99.0399960841456,78.625656788708,92.9612
hsa-miR-34a-5p,CABLES1,28.7895,86.1223004343222,90.404567535804,93.033
hsa-miR-34a-5p,LPO,92.5393,64.9737128139054,91.6475418476157,93.2155
hsa-miR-34a-5p,LGI3,37.0872,71.0765284649928,99.5685314803732,93.3041
hsa-miR-34a-5p,GPR85,57.8611,75.0514072059465,95.4156092390893,93.4532
hsa-miR-34a-5p,RHOBTB3,56.3338,98.1982500406223,29.3445850234781,93.4775
hsa-miR-34a-5p,FOXG1,54.5655,93.2780750725665,25.1629804762103,93.5312
hsa-miR-34a-5p,TBL1XR1,91.1291,61.6593246979038,55.4263706827715,93.6391
hsa-miR-34a-5p,GOLPH3L,86.0115,72.6009467135557,71.9071055588934,93.7151
hsa-miR-34a-5p,MAPK13,53.5701,92.5141814183726,67.1716108967559,93.8115
hsa-miR-34a-5p,SOGA1,86.7822,24.0489221564399,99.6200414889228,93.8527
hsa-miR-34a-5p,MID1,67.2342,87.9464101079849,60.1919128498962,94.0765
hsa-miR-34a-5p,TSEN15,59.9532,95.514092970871,16.4969859950273,94.1266
hsa-miR-34a-5p,LPGAT1,73.066,69.4985847625247,46.3871517971335,94.2199
hsa-miR-34a-5p,TFDP2,61.8174,98.0605755407496,99.54263208005,94.224
hsa-miR-34a-5p,TTLL7,95.9513,67.3930617814318,11.8261938895005,94.2623
hsa-miR-34a-5p,SLC6A6,37.4224,81.7458452521892,50.5239673155606,94.3675
hsa-miR-34a-5p,HOXA13,92.7295,76.5504606937599,0.0000131269134937713,94.5917
hsa-miR-34a-5p,TPD52,85.7573,89.21055880388,98.9335826746795,94.7812
hsa-miR-34a-5p,CES4A,32.093,97.259173020507,44.3669329373556,94.9012
hsa-miR-34a-5p,RAET1L,76.6332,90.6610436154612,8.20551548273502,95.2533
hsa-miR-34a-5p,RALGPS2,78.4088,76.7447663785488,99.2741341914484,95.3111
hsa-miR-34a-5p,FBXO30,92.9422,87.9375576128592,80.5282191228413,95.3182
hsa-miR-34a-5p,WASF1,69.6717,93.4804665009347,58.5083468135796,95.3354
hsa-miR-34a-5p,ARSB,74.4936,77.895482315379,42.806510476524,95.3543
hsa-miR-34a-5p,SLC4A7,60.7258,80.1204481484654,95.6192207942912,95.3832
hsa-miR-34a-5p,ZYG11B,83.2776,78.974665754413,96.6396676685565,95.5912
hsa-miR-34a-5p,PPP2R3A,67.1484,69.1096248695167,99.2794112106729,95.6015
hsa-miR-34a-5p,SLC15A5,49.9518,97.9287717244335,55.4329078856914,95.6377
hsa-miR-34a-5p,KDM5D,55.7346,93.2915745467608,1.11681154622308,95.6419
hsa-miR-34a-5p,CNOT6L,56.0561,94.1165372508813,90.8910640767967,95.7521
hsa-miR-34a-5p,TRNP1,59.7881,98.1752397492676,54.8700652158189,95.8058
hsa-miR-34a-5p,FAM70A,79.6738,67.2049055989437,85.6531761814255,95.8847
hsa-miR-34a-5p,PLEKHG4B,65.2719,61.9464150647626,89.3808914408192,96.3828
hsa-miR-34a-5p,HMGN4,77.8985,93.67994582242,65.2258610172282,96.8562
hsa-miR-34a-5p,RP11-93B14.6,62.8347,97.5394710529605,56.1084844886483,96.9858
hsa-miR-34a-5p,PLIN4,52.5959,78.4730630887819,52.7746553955487,96.9904
hsa-miR-34a-5p,RPS6KL1,43.6265,85.1456448434719,42.5017035451987,97.1316
hsa-miR-34a-5p,LHPP,81.0012,78.0753204053343,89.6155744002609,97.2143
hsa-miR-34a-5p,SFMBT2,86.6152,81.6910031542145,58.8467980241895,97.3219
hsa-miR-34a-5p,PREB,20.2294,98.6920767612786,88.9236679169177,97.4454
hsa-miR-34a-5p,MXD4,36.1395,83.2475707529671,79.9614646327477,97.5846
hsa-miR-34a-5p,LYST,97.3974,87.908010570948,29.1666103303296,97.6893
hsa-miR-34a-5p,CSDC2,20.1297,93.4632184636251,77.4441426858741,97.7299
hsa-miR-34a-5p,MRVI1,70.1915,83.2992141803496,88.9556713320155,97.8199
hsa-miR-34a-5p,RAB3B,86.4395,50.3546884223769,62.5545603750727,97.9792
hsa-miR-34a-5p,KCNK9,42.0203,80.2535840987811,81.466714676165,98.2633
hsa-miR-34a-5p,ZHX2,66.1592,98.4557468957793,58.639261521853,98.3421
hsa-miR-34a-5p,TMEM130,70.0109,84.7436656641067,89.3995185310669,98.4082
hsa-miR-34a-5p,C7orf49,44.2507,95.8547087916352,21.1495316907977,98.4545
hsa-miR-34a-5p,C16orf58,35.0268,99.0203858324761,79.4718438863435,98.4801
hsa-miR-34a-5p,AP3S2,38.2468,91.7931871259472,92.8272444363874,98.552
hsa-miR-34a-5p,MYCN,79.7277,99.4130245839134,18.3824833416186,98.9665
hsa-miR-34a-5p,PEAK1,62.7984,76.5280777445794,98.419493361523,99.1219
hsa-miR-34a-5p,CYP4F3,96.6724,96.8144803585361,2.05835254347732,99.2442
hsa-miR-34a-5p,DLL1,70.9636,99.980428473156,81.6314574405118,99.4573
hsa-miR-34a-5p,ICOSLG,99.8046,82.1788430168374,38.5055691586843,99.5156
hsa-miR-34a-5p,SH3BP2,42.8258,14.9555198908518,85.0414488857023,0.639165
hsa-miR-34a-5p,ERC1,13.5373,15.0931789007943,99.6956000029929,0.994032
hsa-miR-34a-5p,PAX5,39.9248,8.22838260189625,96.3619153059417,1.28199
hsa-miR-34a-5p,ELFN2,94.4531,11.1946267910425,64.6283501688187,1.56498
hsa-miR-34a-5p,RGP1,18.4893,22.5046225824285,26.4524634425304,1.59321
hsa-miR-34a-5p,RPTOR,15.7444,25.7346060686139,43.4529978391788,2.07033
hsa-miR-34a-5p,ING5,0.246327,24.2901313499614,32.073000866245,2.52082
hsa-miR-34a-5p,GPR157,8.79181,27.7223436202476,32.8312245165587,2.57222
hsa-miR-34a-5p,SPOCK2,26.034,18.7587856948016,33.4763598071236,2.77377
hsa-miR-34a-5p,GOLGA3,2.83492,43.2753565898113,5.470024233595,3.60713
hsa-miR-34a-5p,BTBD2,4.80293,35.1089337088299,46.9106793610921,4.83862
hsa-miR-34a-5p,SLC19A1,11.2209,19.5212542754144,44.448319801017,5.37814
hsa-miR-34a-5p,PLXNA2,32.7624,25.9677450084862,42.8446179063964,5.69231
hsa-miR-34a-5p,PIP4K2B,12.8219,55.9804606922109,42.7075466756945,5.98702
hsa-miR-34a-5p,TRMT61A,8.23929,18.7080948981281,52.797076163796,6.38883
hsa-miR-34a-5p,MGLL,10.5691,2.2075396615791,33.3960099696283,6.70474
hsa-miR-34a-5p,AFAP1,7.43506,2.05696204982584,19.7928389273894,6.83838
hsa-miR-34a-5p,TEX261,28.3569,5.25079203885742,43.7800155081356,7.48876
hsa-miR-34a-5p,ZBTB39,8.74559,38.0365769918463,97.1791575593235,8.21724
hsa-miR-34a-5p,NAA60,14.9677,28.7167584161051,40.1175935164599,8.44423
hsa-miR-34a-5p,C1orf106,33.8379,5.84565182943046,18.4002309286622,8.46606
hsa-miR-34a-5p,GLYR1,8.87455,47.8864687249789,11.2302582707103,8.72109
hsa-miR-34a-5p,FZD1,8.66856,25.3312560304235,51.6267461912589,9.18086
hsa-miR-34a-5p,TGM2,9.10919,33.600160289798,95.7560819943772,9.18602
hsa-miR-34a-5p,BET1L,45.1186,2.4077779896456,0.0000131269134937713,9.40923
hsa-miR-34a-5p,AC009237.1,18.5493,4.94414563508482,0.0000131269134937713,9.51555
hsa-miR-34a-5p,TTI1,22.4955,51.6721921829448,39.2440630580169,9.65948
hsa-miR-34a-5p,ARRB1,7.27224,11.919958263932,12.1685569203316,10.767
hsa-miR-34a-5p,LZTS1,11.1253,1.8375471881362,7.59783127636787,11.4894
hsa-miR-34a-5p,ASXL1,12.3151,11.2631542423743,16.9428416118432,11.7186
hsa-miR-34a-5p,SSH1,6.85333,1.56926159657499,9.16061658162833,11.9341
hsa-miR-34a-5p,KCNN1,4.13103,28.4002913965675,0.0000131269134937713,12.1558
hsa-miR-34a-5p,ILF3,16.9312,4.28953343865453,29.2534842438314,12.4932
hsa-miR-34a-5p,TK1,16.7504,45.5168346885215,2.55226579059396,12.512
hsa-miR-34a-5p,SH3GL1,39.2873,39.4125397490972,20.4594104676896,12.5299
hsa-miR-34a-5p,SLC16A2,52.2794,52.0970732241531,4.08651318591897,13.0095
hsa-miR-34a-5p,PSMD9,3.94599,48.9208707757218,30.9673471964917,13.4576
hsa-miR-34a-5p,FAM213B,10.9359,23.5311557486152,53.7562859866129,13.7694
hsa-miR-34a-5p,ACACB,21.6495,14.1724342131046,38.5231198420255,14.415
hsa-miR-34a-5p,MOB3B,67.7536,5.15137766664958,28.8945681750847,15.5325
hsa-miR-34a-5p,EPN3,23.2107,14.9226115340809,36.151086573701,15.7534
hsa-miR-34a-5p,SFXN5,82.1683,2.80018439212944,60.9226618702675,16.0171
hsa-miR-34a-5p,C2CD4C,0.863436,47.9695644556908,11.10341290562,16.3085
hsa-miR-34a-5p,SNTA1,11.9913,36.4836727615928,69.4353733825838,16.3777
hsa-miR-34a-5p,KPNA4,50.0948,4.34827125408179,0.501933791261335,16.7758
hsa-miR-34a-5p,PPP2R5C,9.32684,71.952600193903,4.37957152966742,16.8424
hsa-miR-34a-5p,INSIG1,18.2717,40.7315150530368,8.30319284604218,17.0613
hsa-miR-34a-5p,CTSA,18.79,53.6040730461738,83.2606780549642,17.1172
hsa-miR-34a-5p,NDRG4,5.85324,13.1411843631633,69.388589062892,17.6369
hsa-miR-34a-5p,HDAC4,35.511,3.91473908684073,19.2309151414615,17.7556
hsa-miR-34a-5p,RPUSD1,0.33768,15.0881524184351,26.3098920350746,17.8714
hsa-miR-34a-5p,LTBR,12.3957,40.0860031906158,33.1959426810697,18.0117
hsa-miR-34a-5p,PRR14L,25.9362,36.3538439113809,57.4681045537657,18.2148
hsa-miR-34a-5p,PLEK,7.13111,23.2990159092426,40.6370779910624,18.5969
hsa-miR-34a-5p,GTF2H5,24.9435,26.1564820633578,5.68173509442255,18.6553
hsa-miR-34a-5p,CDC42EP1,16.5749,30.1906020424712,94.794496200218,19.0331
hsa-miR-34a-5p,FGFR1,0.273994,41.4400864214187,85.4681523357308,19.1688
hsa-miR-34a-5p,NDOR1,17.1856,36.7164864129303,21.3629621772929,20.9077
hsa-miR-34a-5p,EXOC6B,42.239,41.9169749033699,47.5333151219287,21.4428
hsa-miR-34a-5p,FAM101A,21.7631,45.4023873390267,50.2833509912198,21.6011
hsa-miR-34a-5p,ZNF618,61.3631,0.664308892753454,29.3326001514583,21.9645
hsa-miR-34a-5p,TNIP2,15.7636,40.4480957996421,48.5939172245714,22.0113
hsa-miR-34a-5p,CABP1,34.6069,38.5770129125607,58.7909167534465,22.1161
hsa-miR-34a-5p,SMAD3,63.3537,2.83673288250408,52.0070591290004,22.7537
hsa-miR-34a-5p,FAM203B,43.6721,29.115267851099,0.0000131269134937713,23.1845
hsa-miR-34a-5p,FUT4,62.918,9.94808240085244,22.9385068424693,23.5203
hsa-miR-34a-5p,TTLL12,3.10129,19.0244147633286,59.2706004263359,23.6625
hsa-miR-34a-5p,PCDHGA6,31.2672,45.0319301676769,75.8667471258951,24.2919
hsa-miR-34a-5p,PCDHGB4,31.2672,45.0319301676769,75.8666421105872,24.2919
hsa-miR-34a-5p,PCDHGA2,31.2672,45.0319301676769,75.8668915219435,24.2919
hsa-miR-34a-5p,PCDHGA8,31.2672,45.0319301676769,75.8667865066356,24.2919
hsa-miR-34a-5p,CTDNEP1,11.9775,42.0419786403156,66.0685038482203,24.2987
hsa-miR-34a-5p,LHX3,5.41029,56.6422292364068,41.7850265760927,24.2989
hsa-miR-34a-5p,JMJD4,7.42419,40.8930827702873,23.9333824892487,24.6311
hsa-miR-34a-5p,TCF7,84.4704,44.2562022067884,86.5794768321135,24.8856
hsa-miR-34a-5p,PCDHGC3,31.2672,45.4452712108649,75.6623348289701,24.9351
hsa-miR-34a-5p,AL033532.1,10.1866,29.2559861222617,27.3761649643466,25.093
hsa-miR-34a-5p,CACNG8,47.3007,38.4991140534406,65.0317270935688,25.6016
hsa-miR-34a-5p,HN1L,48.9097,7.13265591737795,79.7119613879716,26.2817
hsa-miR-34a-5p,KCNK5,91.1412,33.0532728131433,94.4136975666772,26.5107
hsa-miR-34a-5p,PRC1,25.0145,26.4661412585599,64.2257739857917,26.8006
hsa-miR-34a-5p,ST6GALNAC4,2.40244,50.2156353187138,49.3346033184575,27.0914
hsa-miR-34a-5p,RWDD2B,58.2015,16.5171914216147,0.620797992947434,27.2016
hsa-miR-34a-5p,IL1B,25.9448,61.1289494868728,85.5005889389739,27.4631
hsa-miR-34a-5p,SLC30A2,46.5728,17.0832089621019,36.05527323211,27.7387
hsa-miR-34a-5p,DOLPP1,1.14698,22.574009724888,21.1916822100262,27.8778
hsa-miR-34a-5p,B3GNT3,25.1543,27.1974440995525,21.5241212942559,28.0322
hsa-miR-34a-5p,TMEM185A,33.128,16.9743534774196,68.1358877081814,28.0652
hsa-miR-34a-5p,FMN1,35.2434,10.6715705720447,63.7249953629178,28.6698
hsa-miR-34a-5p,AMIGO1,22.8244,8.44461428292389,50.8066422707355,28.9123
hsa-miR-34a-5p,VARS2,9.64613,78.1966994986064,56.1708898353977,29.4615
hsa-miR-34a-5p,FKTN,57.2215,8.08685110939655,50.7495795777781,29.4879
hsa-miR-34a-5p,SUV420H2,9.07539,35.2069849671776,23.0647089887984,29.563
hsa-miR-34a-5p,FAM3A,8.8259,34.0089627834289,44.2682841824499,29.9118
hsa-miR-34a-5p,PTCHD1,82.9967,20.4849525396283,98.1852173363996,30.0572
hsa-miR-34a-5p,TSHR,47.0049,27.5092409051262,79.9142471249106,30.3237
hsa-miR-34a-5p,LARP4B,3.08511,13.1548697165203,0.0000131269134937713,30.4751
hsa-miR-34a-5p,GNAI2,17.218,20.2940546394897,81.542456967024,30.5502
hsa-miR-34a-5p,KREMEN2,13.7883,60.8142173395208,20.4601324479318,30.7562
hsa-miR-34a-5p,PRR3,52.6384,26.0233538580072,10.3549950596861,30.8323
hsa-miR-34a-5p,CCDC43,28.1793,47.8628156015197,20.2648696097119,30.8779
hsa-miR-34a-5p,SLC22A12,40.1849,46.6990571434369,53.335581536051,31.2736
hsa-miR-34a-5p,LASP1,39.5294,35.2435566924476,75.0664648447473,31.4954
hsa-miR-34a-5p,PLA2G4E,28.0524,12.7903684233435,21.6416465507656,31.5136
hsa-miR-34a-5p,ATP5D,49.8332,46.7477652290411,0.906702168841774,31.654
hsa-miR-34a-5p,AC013269.5,29.1052,14.7730949825483,68.6931383129054,31.7398
hsa-miR-34a-5p,H2AFJ,71.4221,18.582045590892,8.43725801355406,32.15
hsa-miR-34a-5p,SCRIB,31.155,60.4935138240657,31.7930300552499,32.2928
hsa-miR-34a-5p,FAM129A,23.4092,51.2100810944317,73.3290653361927,32.4533
hsa-miR-34a-5p,DTX3L,54.502,9.63256026705879,40.6769313004295,32.4954
hsa-miR-34a-5p,SCN3B,42.3832,18.6540272966648,41.9053084844361,32.9264
hsa-miR-34a-5p,C15orf53,32.2858,31.1996160975692,99.8854282990264,33.087
hsa-miR-34a-5p,ZNF346,8.28889,15.8343410823775,99.2492324365507,33.1981
hsa-miR-34a-5p,ECEL1,61.8562,57.4944929425554,76.6286988196411,33.2419
hsa-miR-34a-5p,C19orf55,21.4467,35.2254179841498,65.8014630470165,33.2732
hsa-miR-34a-5p,CD99L2,33.574,24.0407821981047,27.0070361569018,33.5334
hsa-miR-34a-5p,SRCIN1,11.1872,31.8917681399088,85.4338910915121,33.6242
hsa-miR-34a-5p,RWDD1,39.9114,14.0910733545783,21.6645792686393,34.3354
hsa-miR-34a-5p,IQGAP1,51.5483,32.678989629027,75.5489970578649,34.618
hsa-miR-34a-5p,HOXC8,42.329,15.1595145269987,85.854490526766,34.6511
hsa-miR-34a-5p,EIF4E3,51.2348,7.2486909847212,95.1918216178475,34.8264
hsa-miR-34a-5p,AC025278.1,11.8405,27.2892141911925,6.7893184204595,35.1398
hsa-miR-34a-5p,HECA,51.7235,24.1591097751218,6.44850436542072,35.5908
hsa-miR-34a-5p,OTOP3,8.29841,54.800368102702,64.8401922987811,35.6872
hsa-miR-34a-5p,FBXW9,36.1425,70.5581114800985,90.1287710832999,36.2543
hsa-miR-34a-5p,SIX5,15.7994,35.7291582601525,50.4733236833017,36.2598
hsa-miR-34a-5p,SETD1B,29.5662,49.852078911281,6.06301942376263,36.4311
hsa-miR-34a-5p,SLC7A8,22.2572,13.9947956932418,75.0887280900328,36.5298
hsa-miR-34a-5p,SND1,46.8775,64.0365797800337,35.8636071681874,36.5989
hsa-miR-34a-5p,RAB40B,29.1167,50.8370990644547,43.836172444062,36.6824
hsa-miR-34a-5p,EXOSC6,30.0809,31.7631939740454,2.35030822649229,37.1516
hsa-miR-34a-5p,VANGL1,7.42471,24.4124475840123,42.643329814883,37.4049
hsa-miR-34a-5p,PAICS,31.3496,22.140214228833,22.2612499945851,37.4126
hsa-miR-34a-5p,EYA3,40.1527,3.6290660485978,19.6994409378812,37.6619
hsa-miR-34a-5p,NUDT8,12.4071,45.6979971675114,28.456588706365,37.8009
hsa-miR-34a-5p,BMP6,60.083,45.7971172310449,27.0140721825345,38.0166
hsa-miR-34a-5p,FUT5,8.3428,44.9656332662981,4.00513944917108,38.1022
hsa-miR-34a-5p,ZNF585B,68.5028,7.28490644159591,0.0000131269134937713,38.3481
hsa-miR-34a-5p,CUL5,42.4661,35.307793433106,20.6175766483761,38.3666
hsa-miR-34a-5p,IL4R,27.8654,23.4752758253151,2.58251019928361,38.5741
hsa-miR-34a-5p,FAM20A,55.5897,49.694747689948,10.7570199123463,38.9521
hsa-miR-34a-5p,CBX5,54.2993,4.81363522794284,0.0000131269134937713,39.4204
hsa-miR-34a-5p,ADAM19,49.9051,29.3865429991944,79.8317969812562,39.4594
hsa-miR-34a-5p,PLEKHG6,20.0486,55.5153987719893,61.856234831031,39.7953
hsa-miR-34a-5p,KCTD2,49.3522,25.284491931063,50.228165446892,40.0459
hsa-miR-34a-5p,EN2,19.047,60.284732799478,42.2470151695925,40.0524
hsa-miR-34a-5p,ZNF446,17.5179,41.8352190516228,40.7823141619575,40.0887
hsa-miR-34a-5p,DUSP5,40.8443,44.079136814344,73.1673155081225,40.2743
hsa-miR-34a-5p,RPP30,69.4297,18.5560689778985,37.0029051172253,40.3965
hsa-miR-34a-5p,C2,28.5273,49.8974876417464,37.3585394575986,40.4286
hsa-miR-34a-5p,LILRB4,59.3036,22.2933864038996,1.73074416341327,40.5683
hsa-miR-34a-5p,KIAA1958,38.2563,29.4758656818582,84.653115403816,40.7666
hsa-miR-34a-5p,PYGB,81.3247,8.00288019762672,91.3323777815437,41.4918
hsa-miR-34a-5p,ABTB2,19.4641,19.5451784726526,32.8543803919618,41.5423
hsa-miR-34a-5p,ZNF497,35.2132,9.85878295308394,44.7214908708224,42.1609
hsa-miR-34a-5p,MAP3K2,40.1594,6.16121268804969,37.0260872464553,42.1854
hsa-miR-34a-5p,MAPKAPK3,29.9594,14.0283933519078,25.4799035486904,43.0121
hsa-miR-34a-5p,TIMM10,18.988,79.4597406644901,66.429625238434,43.2674
hsa-miR-34a-5p,RP11-429E11.3,9.89759,44.0006261029798,97.3439659582378,43.3373
hsa-miR-34a-5p,FXN,36.6437,35.5574214037068,1.98513062000907,43.5256
hsa-miR-34a-5p,ZNF238,10.6381,26.8287140554233,53.9679443397865,44.061
hsa-miR-34a-5p,TNFRSF10D,19.7327,22.555793566939,4.0225851172043,44.2586
hsa-miR-34a-5p,RNF112,1.13589,61.5543959105345,0.0000131269134937713,44.2832
hsa-miR-34a-5p,TNXB,25.8632,76.1434008172797,88.2988793422681,44.6454
hsa-miR-34a-5p,ADAT1,32.5651,81.4498171955884,51.1414441993941,44.8604
hsa-miR-34a-5p,FAM219B,25.8471,9.48932488223393,99.8644252374363,44.9695
hsa-miR-34a-5p,LAMC1,33.6027,15.1722627395769,42.8725519783112,45.093
hsa-miR-34a-5p,ELL,9.88676,56.8224855544783,21.1535353994133,45.2299
hsa-miR-34a-5p,TRIM54,40.6055,36.7260127200209,54.1590722002558,45.305
hsa-miR-34a-5p,AFF4,83.9085,10.3497827614735,92.4383596241345,45.7221
hsa-miR-34a-5p,SUPT16H,86.9754,42.675470316879,15.4009543528648,45.7923
hsa-miR-34a-5p,SH3KBP1,61.4419,22.0985230816225,1.62620142434888,46.1234
hsa-miR-34a-5p,PLA2G16,23.8505,26.450566133715,0.0000131269134937713,46.128
hsa-miR-34a-5p,ST3GAL3,21.2689,30.6197428144924,40.7652491744156,46.5771
hsa-miR-34a-5p,SYNPO2L,18.4084,17.3416352130725,1.46025098396062,46.5956
hsa-miR-34a-5p,KCNE1L,85.5121,24.0386058629076,82.2711319350633,46.6748
hsa-miR-34a-5p,ZNF526,39.2683,10.0395659287832,80.4885889710036,46.7489
hsa-miR-34a-5p,NCK2,13.0042,35.0166214696319,15.1234776554335,46.8818
hsa-miR-34a-5p,CRMP1,76.3369,34.4991803503419,9.67411518367768,47.0686
hsa-miR-34a-5p,NEK11,7.71097,56.0149257869698,71.5638630248583,47.1074
hsa-miR-34a-5p,C10orf107,56.6368,75.8754482592184,31.8229725449292,47.2323
hsa-miR-34a-5p,EFHD1,15.0176,62.0651531249308,81.1972979036188,47.2366
hsa-miR-34a-5p,ZNF805,92.2206,39.8565663440682,0.0000131269134937713,47.7524
hsa-miR-34a-5p,NKX3-1,45.1961,19.7400650298251,68.6080496596388,47.7652
hsa-miR-34a-5p,PRR15,95.7773,54.8726441171491,26.571314517303,48.1539
hsa-miR-34a-5p,IL28RA,61.7008,32.4552608217687,90.0583320654923,48.204
hsa-miR-34a-5p,HIPK1,24.0479,13.5537973796305,47.8227504375528,48.3303
hsa-miR-34a-5p,RNF44,13.9404,41.0238565062431,87.7932962690555,49.0386
hsa-miR-34a-5p,EIF2AK1,40.8369,39.4391204693697,1.12022454373146,49.052
hsa-miR-34a-5p,LIX1,22.495,28.3065308488931,69.98271316762,49.1856
hsa-miR-34a-5p,TNFRSF14,8.54431,67.0482172097152,33.1217887467434,49.2287
hsa-miR-34a-5p,RNF222,17.1479,45.3393743028563,21.4121355952405,49.3692
hsa-miR-34a-5p,MRPS25,16.2396,34.6145106258598,65.6369565671126,49.8624
hsa-miR-34a-5p,C14orf159,52.9524,56.6497263626375,29.7790989870355,50.0082
hsa-miR-34a-5p,MAML1,83.4634,18.1211117370764,49.6534560472212,50.1669
hsa-miR-34a-5p,EMD,11.6292,74.1752657723504,84.2686674883239,50.4902
hsa-miR-34a-5p,AC005609.1,65.8331,16.7807138596306,0.0000131269134937713,50.6511
hsa-miR-34a-5p,RAB27B,47.5789,15.3925992521152,16.6007542461955,51.2575
hsa-miR-34a-5p,ITPRIPL2,11.5979,43.495453008431,93.7762546474196,51.3553
hsa-miR-34a-5p,TBX4,20.5812,58.2310158900351,55.9483230171108,51.5248
hsa-miR-34a-5p,ACTL8,2.97096,67.8143491588271,5.0133389131467,51.6926
hsa-miR-34a-5p,BRS3,15.5537,47.2270778850731,52.5535850454001,51.9547
hsa-miR-34a-5p,VAV2,5.57085,43.0607203715972,32.1820723904648,52.0693
hsa-miR-34a-5p,AC083864.4,30.0999,56.9683697173723,83.7968862173578,52.2503
hsa-miR-34a-5p,RP11-162A12.2,38.9589,50.6209680679735,1.53559946741487,52.458
hsa-miR-34a-5p,SLC10A7,43.0638,41.94779211956,98.6975082624075,53.0449
hsa-miR-34a-5p,SNAPC3,66.4057,13.1079584628227,52.5037552817777,53.1095
hsa-miR-34a-5p,MTDH,60.3653,15.9610487116483,82.7018653475344,53.3507
hsa-miR-34a-5p,ANO5,46.2368,32.9394295709274,39.3575189713436,53.4884
hsa-miR-34a-5p,C21orf91,64.6875,28.7531132823518,62.2035729620762,53.7259
hsa-miR-34a-5p,CDH17,69.538,45.1433260009167,27.5623439784288,53.7321
hsa-miR-34a-5p,NIPSNAP1,53.448,30.3679230187643,98.8728575728573,53.788
hsa-miR-34a-5p,MIB1,62.0782,21.4174928091871,85.488787843743,53.7957
hsa-miR-34a-5p,FOXM1,55.7022,29.4344146285662,23.9022454504415,53.8757
hsa-miR-34a-5p,CBFB,65.3476,38.5512531585904,75.672009364215,53.9757
hsa-miR-34a-5p,SAPCD2,27.7045,64.3156773428945,79.8314294276784,54.021
hsa-miR-34a-5p,VWC2L,99.5748,14.1102653781317,95.7398440023854,54.301
hsa-miR-34a-5p,ADORA2A,39.1243,29.7235729011106,99.748081403141,54.3667
hsa-miR-34a-5p,CDK14,59.6573,17.3855724001662,55.8517089337966,54.4892
hsa-miR-34a-5p,USP47,18.6143,25.860926449629,94.7194496357741,54.8167
hsa-miR-34a-5p,HPCAL1,50.0938,41.0933753131096,9.22249685183797,54.909
hsa-miR-34a-5p,TYW5,88.2473,25.4600548002752,80.3532504928828,54.9455
hsa-miR-34a-5p,TNFAIP8L3,61.1249,35.6410205571511,1.29545571195981,55.1377
hsa-miR-34a-5p,SOX9,17.5201,78.6530250981791,58.6486341380875,55.2682
hsa-miR-34a-5p,STAT3,57.8695,52.0525861445362,34.1941000562226,55.3364
hsa-miR-34a-5p,ZNF93,62.7596,34.6152618874759,0.0000131269134937713,55.5571
hsa-miR-34a-5p,GOLT1B,61.0651,43.1767399490102,6.28545497291458,55.6429
[truncated: 2,646 more rows]
