# Supplementary material for: TP53/miR-34a-associated signaling targets SERPINE1 expression in human pancreatic cancer
Source: Aging (Albany NY). 2020 Jan 27;12(3):2777–97. doi: 10.18632/aging.102776 (PMC7041729; doi:10.18632/aging.102776)
Supplement: Supplementary Table 3 [file aging-12-102776-s002..xlsx]

## Sheet: Sheet1
SUPPLEMETAL TABLE 3
Choose Species:
Choose Dataset:
microRNA ID:
Click above for all microRNAs linked to RFAM
Gene ID:
Click above for all RefSeq Id's linked to NCBI	vertebrates: use RefSeq identifiers, e.g. NM_003483 or Gene symbols (for example HK2).
(Warning: may take ~20 secs)
Tissue:
PicTar predictions
Rank	human Refseq Id	All miRNAs predicted to target the gene	PicTar score	microRNAs with Anchor sites	predicted sites for all microRNAs embedded in the UCSC genome browser	annotation
Click here for detailed 3'utr alignments and location of predicted site
1	NM_005618	All miRNA predictions	14.53	hsa-miR-34a	Genome browser	Homo sapiens delta-like 1 (Drosophila) (DLL1), mRNA.
2	NM_152660	All miRNA predictions	11.68	hsa-miR-34a	Genome browser	Homo sapiens hypothetical protein MGC34648 (MGC34648), mRNA.
3	NM_005639	All miRNA predictions	10.97	hsa-miR-34a	Genome browser	Homo sapiens synaptotagmin I (SYT1), mRNA.
4	NM_014903	All miRNA predictions	9.86	hsa-miR-34a	Genome browser	Homo sapiens neuron navigator 3 (NAV3), mRNA.
5	NM_017617	All miRNA predictions	9.64	hsa-miR-34a	Genome browser	Homo sapiens Notch homolog 1, translocation-associated (Drosophila) (NOTCH1), mRNA.
6	NM_152663	All miRNA predictions	9.29	hsa-miR-34a	Genome browser	Homo sapiens Ral GEF with PH domain and SH3 binding motif 2 (RALGPS2), mRNA.
7	NM_014232	All miRNA predictions	8.66	hsa-miR-34a	Genome browser	Homo sapiens vesicle-associated membrane protein 2 (synaptobrevin 2) (VAMP2), mRNA.
8	NM_005076	All miRNA predictions	8.6	hsa-miR-34a	Genome browser	Homo sapiens contactin 2 (axonal) (CNTN2), mRNA.
9	NM_000245	All miRNA predictions	8.56	hsa-miR-34a	Genome browser	Homo sapiens met proto-oncogene (hepatocyte growth factor receptor) (MET), mRNA.
10	NM_173570	All miRNA predictions	8.5	hsa-miR-34a	Genome browser	Homo sapiens zinc finger, DHHC domain containing 23 (ZDHHC23), mRNA.
11	NM_020443	All miRNA predictions	8.3	hsa-miR-34a	Genome browser	Homo sapiens neuron navigator 1 (NAV1), mRNA.
12	NM_005374	All miRNA predictions	8.3	hsa-miR-34a	Genome browser	Homo sapiens membrane protein, palmitoylated 2 (MAGUK p55 subfamily member 2) (MPP2), mRNA.
13	NM_015288	All miRNA predictions	8.28	hsa-miR-34a	Genome browser	Homo sapiens PHD finger protein 15 (PHF15), mRNA.
14	NM_017599	All miRNA predictions	8.17	hsa-miR-34a	Genome browser	Homo sapiens transmembrane protein vezatin (VEZATIN), mRNA.
15	NM_018026	All miRNA predictions	8.1	hsa-miR-34a	Genome browser	Homo sapiens phosphofurin acidic cluster sorting protein 1 (PACS1), mRNA.
16	NM_005802	All miRNA predictions	7.55	hsa-miR-34a	Genome browser	Homo sapiens topoisomerase I binding, arginine/serine-rich (TOPORS), mRNA.
17	NM_198490	All miRNA predictions	7.55	hsa-miR-34a	Genome browser	Homo sapiens RAB43, member RAS oncogene family (RAB43), mRNA.
18	NM_013336	All miRNA predictions	7.48	hsa-miR-34a	Genome browser	Homo sapiens Sec61 alpha 1 subunit (S. cerevisiae) (SEC61A1), mRNA.
19	NM_025049	All miRNA predictions	7.28	hsa-miR-34a	Genome browser	Homo sapiens chromosome 15 open reading frame 20 (C15orf20), mRNA.
20	NM_017775	All miRNA predictions	7.04	hsa-miR-34a	Genome browser	Homo sapiens tetratricopeptide repeat domain 19 (TTC19), mRNA.
21	NM_001951	All miRNA predictions	7.03	hsa-miR-34a	Genome browser	Homo sapiens E2F transcription factor 5, p130-binding (E2F5), mRNA.
22	NM_053279	All miRNA predictions	6.95	hsa-miR-34a	Genome browser	Homo sapiens chromosome 8 open reading frame 13 (C8orf13), mRNA.
23	NM_138392	All miRNA predictions	6.8	hsa-miR-34a	Genome browser	Homo sapiens hypothetical protein BC007653 (LOC92799), mRNA.
24	NM_032603	All miRNA predictions	6.77	hsa-miR-34a	Genome browser	Homo sapiens lysyl oxidase-like 3 (LOXL3), mRNA.
25	NM_002742	All miRNA predictions	6.61	hsa-miR-34a	Genome browser	Homo sapiens protein kinase D1 (PRKD1), mRNA.
26	NM_017637	All miRNA predictions	6.49	hsa-miR-34a	Genome browser	Homo sapiens basonuclin 2 (BNC2), mRNA.
27	NM_018490	All miRNA predictions	6.45	hsa-miR-34a	Genome browser	Homo sapiens leucine-rich repeat-containing G protein-coupled receptor 4 (LGR4), mRNA.
28	NM_004756	All miRNA predictions	6.4	hsa-miR-34a	Genome browser	Homo sapiens numb homolog (Drosophila)-like (NUMBL), mRNA.
29	NM_080836	All miRNA predictions	6.39	hsa-miR-34a	Genome browser	Homo sapiens serine/threonine kinase 35 (STK35), mRNA.
30	NM_198793	All miRNA predictions	6.37	hsa-miR-34a	Genome browser	Homo sapiens CD47 antigen (Rh-related antigen, integrin-associated signal transducer) (CD47), transcript variant 2, mRNA.
31	NM_001777	All miRNA predictions	6.36	hsa-miR-34a	Genome browser	Homo sapiens CD47 antigen (Rh-related antigen, integrin-associated signal transducer) (CD47), transcript variant 1, mRNA.
32	NM_006206	All miRNA predictions	6.35	hsa-miR-34a	Genome browser	Homo sapiens platelet-derived growth factor receptor, alpha polypeptide (PDGFRA), mRNA.
33	NM_018712	All miRNA predictions	6.29	hsa-miR-34a	Genome browser	Homo sapiens ELMO domain containing 1 (ELMOD1), mRNA.
34	NM_001149	All miRNA predictions	6.26	hsa-miR-34a	Genome browser	Homo sapiens ankyrin 3, node of Ranvier (ankyrin G) (ANK3), transcript variant 2, mRNA.
35	NM_019106	All miRNA predictions	6.21	hsa-miR-34a	Genome browser	Homo sapiens septin 3 (SEPT3), transcript variant B, mRNA.
36	NM_021959	All miRNA predictions	6.2	hsa-miR-34a	Genome browser	Homo sapiens protein phosphatase 1, regulatory (inhibitor) subunit 11 (PPP1R11), transcript variant 1, mRNA.
37	NM_015460	All miRNA predictions	6.09	hsa-miR-34a	Genome browser	Homo sapiens myosin VIIA and Rab interacting protein (MYRIP), mRNA.
38	NM_004879	All miRNA predictions	6.07	hsa-miR-34a	Genome browser	Homo sapiens etoposide induced 2.4 mRNA (EI24), transcript variant 1, mRNA.
39	NM_012238	All miRNA predictions	6.05	hsa-miR-34a	Genome browser	Homo sapiens sirtuin (silent mating type information regulation 2 homolog) 1 (S. cerevisiae) (SIRT1), mRNA.
40	NM_017423	All miRNA predictions	5.94	hsa-miR-34a	Genome browser	Homo sapiens UDP-N-acetyl-alpha-D-galactosamine:polypeptide N-acetylgalactosaminyltransferase 7 (GalNAc-T7) (GALNT7), mRNA.
41	NM_001259	All miRNA predictions	5.94	hsa-miR-34a	Genome browser	Homo sapiens cyclin-dependent kinase 6 (CDK6), mRNA.
42	NM_022166	All miRNA predictions	5.92	hsa-miR-34a	Genome browser	Homo sapiens xylosyltransferase I (XYLT1), mRNA.
43	NM_000033	All miRNA predictions	5.92	hsa-miR-34a	Genome browser	Homo sapiens ATP-binding cassette, sub-family D (ALD), member 1 (ABCD1), mRNA.
44	NM_005094	All miRNA predictions	5.9	hsa-miR-34a	Genome browser	Homo sapiens solute carrier family 27 (fatty acid transporter), member 4 (SLC27A4), mRNA.
45	NM_001003682	All miRNA predictions	5.86	hsa-miR-34a	Genome browser	Homo sapiens cDNA DKFZp434C184 gene (DKFZp434C184), mRNA.
46	NM_004263	All miRNA predictions	5.84	hsa-miR-34a	Genome browser	Homo sapiens sema domain, immunoglobulin domain (Ig), transmembrane domain (TM) and short cytoplasmic domain, (semaphorin) 4F (SEMA4F), mRNA.
47	NM_015265	All miRNA predictions	5.8	hsa-miR-34a	Genome browser	Homo sapiens SATB family member 2 (SATB2), mRNA.
48	NM_002158	All miRNA predictions	5.8	hsa-miR-34a	Genome browser	Homo sapiens human T-cell leukemia virus enhancer factor (HTLF), mRNA.
49	NM_001742	All miRNA predictions	5.79	hsa-miR-34a	Genome browser	Homo sapiens calcitonin receptor (CALCR), mRNA.
50	NM_014912	All miRNA predictions	5.77	hsa-miR-34a	Genome browser	Homo sapiens cytoplasmic polyadenylation element binding protein 3 (CPEB3), mRNA.
51	NM_014853	All miRNA predictions	5.77	hsa-miR-34a	Genome browser	Homo sapiens RUN and TBC1 domain containing 1 (RUTBC1), mRNA.
52	NM_016026	All miRNA predictions	5.75	hsa-miR-34a	Genome browser	Homo sapiens retinol dehydrogenase 11 (all-trans and 9-cis) (RDH11), mRNA.
53	NM_001003805	All miRNA predictions	5.72	hsa-miR-34a	Genome browser	Homo sapiens ATP synthase, H+ transporting, mitochondrial F0 complex, subunit s (factor B) (ATP5S), nuclear gene encoding mitochondrial protein, transcript variant 2, mRNA.
54	NM_005079	All miRNA predictions	5.67	hsa-miR-34a	Genome browser	Homo sapiens tumor protein D52 (TPD52), mRNA.
55	NM_012264	All miRNA predictions	5.5	hsa-miR-34a	Genome browser	Homo sapiens chromosome 22 open reading frame 5 (C22orf5), mRNA.
56	NM_170781	All miRNA predictions	5.5	hsa-miR-34a	Genome browser	Homo sapiens protein phosphatase 1, regulatory (inhibitor) subunit 11 (PPP1R11), transcript variant 2, mRNA.
57	NM_013449	All miRNA predictions	5.43	hsa-miR-34a	Genome browser	Homo sapiens bromodomain adjacent to zinc finger domain, 2A (BAZ2A), mRNA.
58	NM_033224	All miRNA predictions	5.4	hsa-miR-34a	Genome browser	Homo sapiens purine-rich element binding protein B (PURB), mRNA.
59	NM_017789	All miRNA predictions	5.4	hsa-miR-34a	Genome browser	Homo sapiens sema domain, immunoglobulin domain (Ig), transmembrane domain (TM) and short cytoplasmic domain, (semaphorin) 4C (SEMA4C), mRNA.
60	NM_006426	All miRNA predictions	5.29	hsa-miR-34a	Genome browser	Homo sapiens dihydropyrimidinase-like 4 (DPYSL4), mRNA.
61	NM_020850	All miRNA predictions	5.27	hsa-miR-34a	Genome browser	Homo sapiens RAN binding protein 10 (RANBP10), mRNA.
62	NM_004101	All miRNA predictions	5.26	hsa-miR-34a	Genome browser	Homo sapiens coagulation factor II (thrombin) receptor-like 2 (F2RL2), mRNA.
63	NM_006270	All miRNA predictions	5.21	hsa-miR-34a	Genome browser	Homo sapiens related RAS viral (r-ras) oncogene homolog (RRAS), mRNA.
64	NM_020792	All miRNA predictions	5.21	hsa-miR-34a	Genome browser	Homo sapiens KIAA1363 protein (KIAA1363), mRNA.
65	NM_024408	All miRNA predictions	5.17	hsa-miR-34a	Genome browser	Homo sapiens Notch homolog 2 (Drosophila) (NOTCH2), mRNA.
66	NM_025246	All miRNA predictions	5.13	hsa-miR-34a	Genome browser	Homo sapiens transmembrane protein 22 (TMEM22), mRNA.
67	NM_032552	All miRNA predictions	5.02	hsa-miR-34a	Genome browser	Homo sapiens DAB2 interacting protein (DAB2IP), mRNA.
68	NM_016114	All miRNA predictions	5.01	hsa-miR-34a	Genome browser	Homo sapiens ankyrin repeat and SOCS box-containing 1 (ASB1), mRNA.
69	NM_021809	All miRNA predictions	4.96	hsa-miR-34a	Genome browser	Homo sapiens TGFB-induced factor 2 (TALE family homeobox) (TGIF2), mRNA.
70	NM_178229	All miRNA predictions	4.95	hsa-miR-34a	Genome browser	Homo sapiens IQ motif containing GTPase activating protein 3 (IQGAP3), mRNA.
71	NM_145109	All miRNA predictions	4.9	hsa-miR-34a	Genome browser	Homo sapiens mitogen-activated protein kinase kinase 3 (MAP2K3), transcript variant B, mRNA.
72	NM_031227	All miRNA predictions	4.89	hsa-miR-34a	Genome browser	Homo sapiens chromosome 20 open reading frame 18 (C20orf18), transcript variant 4, mRNA.
73	NM_031228	All miRNA predictions	4.88	hsa-miR-34a	Genome browser	Homo sapiens chromosome 20 open reading frame 18 (C20orf18), transcript variant 3, mRNA.
74	NM_172057	All miRNA predictions	4.86	hsa-miR-34a	Genome browser	Homo sapiens potassium voltage-gated channel, subfamily H (eag-related), member 2 (KCNH2), transcript variant 3, mRNA.
75	NM_020364	All miRNA predictions	4.84	hsa-miR-34a	Genome browser	Homo sapiens deleted in azoospermia 3 (DAZ3), mRNA.
76	NM_002082	All miRNA predictions	4.83	hsa-miR-34a	Genome browser	Homo sapiens G protein-coupled receptor kinase 6 (GRK6), transcript variant 2, mRNA.
77	NM_000214	All miRNA predictions	4.82	hsa-miR-34a	Genome browser	Homo sapiens jagged 1 (Alagille syndrome) (JAG1), mRNA.
78	NM_201532	All miRNA predictions	4.82	hsa-miR-34a	Genome browser	Homo sapiens diacylglycerol kinase, zeta 104kDa (DGKZ), transcript variant 1, mRNA.
79	NM_020698	All miRNA predictions	4.8	hsa-miR-34a	Genome browser	Homo sapiens KIAA1145 protein (KIAA1145), mRNA.
80	NM_016269	All miRNA predictions	4.73	hsa-miR-34a	Genome browser	Homo sapiens lymphoid enhancer-binding factor 1 (LEF1), mRNA.
81	NM_001004106	All miRNA predictions	4.72	hsa-miR-34a	Genome browser	Homo sapiens G protein-coupled receptor kinase 6 (GRK6), transcript variant 1, mRNA.
82	NM_145171	All miRNA predictions	4.7	hsa-miR-34a	Genome browser	Homo sapiens glycoprotein hormone beta 5 (GPHB5), mRNA.
83	NM_152322	All miRNA predictions	4.66	hsa-miR-34a	Genome browser	Homo sapiens BTB (POZ) domain containing 11 (BTBD11), mRNA.
84	NM_014731	All miRNA predictions	4.63	hsa-miR-34a	Genome browser	Homo sapiens ProSAPiP1 protein (ProSAPiP1), mRNA.
85	NM_003931	All miRNA predictions	4.62	hsa-miR-34a	Genome browser	Homo sapiens WAS protein family, member 1 (WASF1), mRNA.
86	NM_006305	All miRNA predictions	4.6	hsa-miR-34a	Genome browser	Homo sapiens acidic (leucine-rich) nuclear phosphoprotein 32 family, member A (ANP32A), mRNA.
87	NM_144720	All miRNA predictions	4.57	hsa-miR-34a	Genome browser	Homo sapiens multiple coiled-coil GABABR1-binding protein (MARLIN1), mRNA.
88	NM_006373	All miRNA predictions	4.55	hsa-miR-34a	Genome browser	Homo sapiens vesicle amine transport protein 1 homolog (T californica) (VAT1), mRNA.
89	NM_016279	All miRNA predictions	4.47	hsa-miR-34a	Genome browser	Homo sapiens cadherin 9, type 2 (T1-cadherin) (CDH9), mRNA.
90	NM_153181	All miRNA predictions	4.46	hsa-miR-34a	Genome browser	Homo sapiens neuropilin (NRP) and tolloid (TLL)-like 1 (NETO1), transcript variant 2, mRNA.
91	NM_022469	All miRNA predictions	4.44	hsa-miR-34a	Genome browser	Homo sapiens gremlin 2 homolog, cysteine knot superfamily (Xenopus laevis) (GREM2), mRNA.
92	NM_080422	All miRNA predictions	4.4	hsa-miR-34a	Genome browser	Homo sapiens protein tyrosine phosphatase, non-receptor type 2 (PTPN2), transcript variant 2, mRNA.
93	NM_005249	All miRNA predictions	4.39	hsa-miR-34a	Genome browser	Homo sapiens forkhead box G1B (FOXG1B), mRNA.
94	NM_080423	All miRNA predictions	4.39	hsa-miR-34a	Genome browser	Homo sapiens protein tyrosine phosphatase, non-receptor type 2 (PTPN2), transcript variant 3, mRNA.
95	NM_022336	All miRNA predictions	4.37	hsa-miR-34a	Genome browser	Homo sapiens ectodysplasin A receptor (EDAR), mRNA.
96	NM_006243	All miRNA predictions	4.37	hsa-miR-34a	Genome browser	Homo sapiens protein phosphatase 2, regulatory subunit B (B56), alpha isoform (PPP2R5A), mRNA.
97	NM_022898	All miRNA predictions	4.34	hsa-miR-34a	Genome browser	Homo sapiens B-cell CLL/lymphoma 11B (zinc finger protein) (BCL11B), transcript variant 2, mRNA.
98	NM_014618	All miRNA predictions	4.34	hsa-miR-34a	Genome browser	Homo sapiens deleted in bladder cancer 1 (DBC1), mRNA.
99	NM_018416	All miRNA predictions	4.32	hsa-miR-34a	Genome browser	Homo sapiens forkhead box J2 (FOXJ2), mRNA.
100	NM_148980	All miRNA predictions	4.24	hsa-miR-34a	Genome browser	Homo sapiens Williams Beuren syndrome chromosome region 20C (WBSCR20C), transcript variant 3, mRNA.
101	NM_002710	All miRNA predictions	4.21	hsa-miR-34a	Genome browser	Homo sapiens protein phosphatase 1, catalytic subunit, gamma isoform (PPP1CC), mRNA.
102	NM_006946	All miRNA predictions	4.2	hsa-miR-34a	Genome browser	Homo sapiens spectrin, beta, non-erythrocytic 2 (SPTBN2), mRNA.
103	NM_003457	All miRNA predictions	4.2	hsa-miR-34a	Genome browser	Homo sapiens zinc finger protein 207 (ZNF207), mRNA.
104	NM_014747	All miRNA predictions	4.18	hsa-miR-34a	Genome browser	Homo sapiens regulating synaptic membrane exocytosis 3 (RIMS3), mRNA.
105	NM_004702	All miRNA predictions	4.18	hsa-miR-34a	Genome browser	Homo sapiens cyclin E2 (CCNE2), transcript variant 3, mRNA.
106	NM_145245	All miRNA predictions	4.17	hsa-miR-34a	Genome browser	Homo sapiens ecotropic viral integration site 5-like (EVI5L), mRNA.
107	NM_014423	All miRNA predictions	4.15	hsa-miR-34a	Genome browser	Homo sapiens ALL1 fused gene from 5q31 (AF5Q31), mRNA.
108	NM_018710	All miRNA predictions	4.12	hsa-miR-34a	Genome browser	Homo sapiens hypothetical protein DKFZp762O076 (DKFZp762O076), mRNA.
109	NM_000034	All miRNA predictions	4.11	hsa-miR-34a	Genome browser	Homo sapiens aldolase A, fructose-bisphosphate (ALDOA), transcript variant 1, mRNA.
110	NM_004458	All miRNA predictions	4.11	hsa-miR-34a	Genome browser	Homo sapiens acyl-CoA synthetase long-chain family member 4 (ACSL4), transcript variant 1, mRNA.
111	NM_002660	All miRNA predictions	4.1	hsa-miR-34a	Genome browser	Homo sapiens phospholipase C, gamma 1 (PLCG1), transcript variant 1, mRNA.
112	NM_018970	All miRNA predictions	4.1	hsa-miR-34a	Genome browser	Homo sapiens G protein-coupled receptor 85 (GPR85), mRNA.
113	NM_017726	All miRNA predictions	4.08	hsa-miR-34a	Genome browser	Homo sapiens protein phosphatase 1, regulatory (inhibitor) subunit 14D (PPP1R14D), mRNA.
114	NM_004241	All miRNA predictions	4.07	hsa-miR-34a	Genome browser	Homo sapiens jumonji domain containing 1C (JMJD1C), mRNA.
115	NM_016374	All miRNA predictions	4.06	hsa-miR-34a	Genome browser	Homo sapiens AT rich interactive domain 4B (RBP1- like) (ARID4B), transcript variant 1, mRNA.
116	NM_003155	All miRNA predictions	4.02	hsa-miR-34a	Genome browser	Homo sapiens stanniocalcin 1 (STC1), mRNA.
117	NM_005097	All miRNA predictions	4.02	hsa-miR-34a	Genome browser	Homo sapiens leucine-rich, glioma inactivated 1 (LGI1), mRNA.
118	NM_006823	All miRNA predictions	4	hsa-miR-34a	Genome browser	Homo sapiens protein kinase (cAMP-dependent, catalytic) inhibitor alpha (PKIA), transcript variant 1, mRNA.
119	NM_002070	All miRNA predictions	3.99	hsa-miR-34a	Genome browser	Homo sapiens guanine nucleotide binding protein (G protein), alpha inhibiting activity polypeptide 2 (GNAI2), mRNA.
120	NM_013306	All miRNA predictions	3.98	hsa-miR-34a	Genome browser	Homo sapiens sorting nexin 15 (SNX15), transcript variant A, mRNA.
121	NM_014752	All miRNA predictions	3.97	hsa-miR-34a	Genome browser	Homo sapiens KIAA0102 gene product (KIAA0102), mRNA.
122	NM_133370	All miRNA predictions	3.95	hsa-miR-34a	Genome browser	Homo sapiens splicing factor YT521-B (YT521), mRNA.
123	NM_002845	All miRNA predictions	3.95	hsa-miR-34a	Genome browser	Homo sapiens protein tyrosine phosphatase, receptor type, M (PTPRM), mRNA.
124	NM_002971	All miRNA predictions	3.95	hsa-miR-34a	Genome browser	Homo sapiens special AT-rich sequence binding protein 1 (binds to nuclear matrix/scaffold-associating DNA's) (SATB1), mRNA.
125	NM_001005476	All miRNA predictions	3.95	hsa-miR-34a	Genome browser	Homo sapiens plakophilin 4 (PKP4), transcript variant 2, mRNA.
126	NM_014992	All miRNA predictions	3.94	hsa-miR-34a	Genome browser	Homo sapiens dishevelled associated activator of morphogenesis 1 (DAAM1), mRNA.
127	NM_152896	All miRNA predictions	3.92	hsa-miR-34a	Genome browser	Homo sapiens ubiquitin-like, containing PHD and RING finger domains, 2 (UHRF2), transcript variant 2, mRNA.
128	NM_182497	All miRNA predictions	3.89	hsa-miR-34a	Genome browser	Homo sapiens type I hair keratin KA36 (KA36), mRNA.
129	NM_013302	All miRNA predictions	3.88	hsa-miR-34a	Genome browser	Homo sapiens eukaryotic elongation factor-2 kinase (EEF2K), mRNA.
130	NM_004308	All miRNA predictions	3.88	hsa-miR-34a	Genome browser	Homo sapiens Rho GTPase activating protein 1 (ARHGAP1), mRNA.
131	NM_173822	All miRNA predictions	3.88	hsa-miR-34a	Genome browser	Homo sapiens hypothetical protein MGC39518 (MGC39518), mRNA.
132	NM_017931	All miRNA predictions	3.86	hsa-miR-34a	Genome browser	Homo sapiens hypothetical protein FLJ20699 (FLJ20699), mRNA.
133	NM_052905	All miRNA predictions	3.86	hsa-miR-34a	Genome browser	Homo sapiens formin-like 2 (FMNL2), transcript variant 2, mRNA.
134	NM_016227	All miRNA predictions	3.85	hsa-miR-34a	Genome browser	Homo sapiens chromosome 1 open reading frame 9 (C1orf9), mRNA.
135	NM_001004422	All miRNA predictions	3.82	hsa-miR-34a	Genome browser	Homo sapiens formin-like 2 (FMNL2), transcript variant 3, mRNA.
136	NM_006186	All miRNA predictions	3.81	hsa-miR-34a	Genome browser	Homo sapiens nuclear receptor subfamily 4, group A, member 2 (NR4A2), transcript variant 1, mRNA.
137	NM_002718	All miRNA predictions	3.79	hsa-miR-34a	Genome browser	Homo sapiens protein phosphatase 2 (formerly 2A), regulatory subunit B'', alpha (PPP2R3A), transcript variant 1, mRNA.
138	NM_003403	All miRNA predictions	3.78	hsa-miR-34a	Genome browser	Homo sapiens YY1 transcription factor (YY1), mRNA.
139	NM_004789	All miRNA predictions	3.78	hsa-miR-34a	Genome browser	Homo sapiens LIM homeobox 2 (LHX2), mRNA.
140	NM_012482	All miRNA predictions	3.78	hsa-miR-34a	Genome browser	Homo sapiens zinc finger protein 281 (ZNF281), mRNA.
141	NM_003575	All miRNA predictions	3.77	hsa-miR-34a	Genome browser	Homo sapiens zinc finger protein 282 (ZNF282), mRNA.
142	NM_020150	All miRNA predictions	3.77	hsa-miR-34a	Genome browser	Homo sapiens SAR1a gene homolog 1 (S. cerevisiae) (SARA1), mRNA.
143	NM_001004417	All miRNA predictions	3.76	hsa-miR-34a	Genome browser	Homo sapiens formin-like 2 (FMNL2), transcript variant 4, mRNA.
144	NM_002892	All miRNA predictions	3.76	hsa-miR-34a	Genome browser	Homo sapiens AT rich interactive domain 4A (RBP1-like) (ARID4A), transcript variant 1, mRNA.
145	NM_004384	All miRNA predictions	3.76	hsa-miR-34a	Genome browser	Homo sapiens casein kinase 1, gamma 3 (CSNK1G3), mRNA.
146	NM_032434	All miRNA predictions	3.76	hsa-miR-34a	Genome browser	Homo sapiens zinc finger protein 512 (ZNF512), mRNA.
147	NM_198993	All miRNA predictions	3.75	hsa-miR-34a	Genome browser	Homo sapiens SH3 and cysteine rich domain 2 (STAC2), mRNA.
148	NM_003557	All miRNA predictions	3.73	hsa-miR-34a	Genome browser	Homo sapiens phosphatidylinositol-4-phosphate 5-kinase, type I, alpha (PIP5K1A), mRNA.
149	NM_017919	All miRNA predictions	3.73	hsa-miR-34a	Genome browser	Homo sapiens syntaxin 17 (STX17), mRNA.
150	NM_001004421	All miRNA predictions	3.72	hsa-miR-34a	Genome browser	Homo sapiens formin-like 2 (FMNL2), transcript variant 1, mRNA.
151	NM_002938	All miRNA predictions	3.71	hsa-miR-34a	Genome browser	Homo sapiens ring finger protein 4 (RNF4), mRNA.
152	NM_021103	All miRNA predictions	3.69	hsa-miR-34a	Genome browser	Homo sapiens thymosin, beta 10 (TMSB10), mRNA.
153	NM_139275	All miRNA predictions	3.68	hsa-miR-34a	Genome browser	Homo sapiens A kinase (PRKA) anchor protein 1 (AKAP1), nuclear gene encoding mitochondrial protein, transcript variant 2, mRNA.
154	NM_004274	All miRNA predictions	3.68	hsa-miR-34a	Genome browser	Homo sapiens A kinase (PRKA) anchor protein 6 (AKAP6), mRNA.
155	NM_014517	All miRNA predictions	3.67	hsa-miR-34a	Genome browser	Homo sapiens upstream binding protein 1 (LBP-1a) (UBP1), mRNA.
156	NM_004687	All miRNA predictions	3.66	hsa-miR-34a	Genome browser	Homo sapiens myotubularin related protein 4 (MTMR4), mRNA.
157	NM_013272	All miRNA predictions	3.65	hsa-miR-34a	Genome browser	Homo sapiens solute carrier organic anion transporter family, member 3A1 (SLCO3A1), mRNA.
158	NM_024107	All miRNA predictions	3.65	hsa-miR-34a	Genome browser	Homo sapiens hypothetical protein MGC3123 (MGC3123), mRNA.
159	NM_006286	All miRNA predictions	3.63	hsa-miR-34a	Genome browser	Homo sapiens transcription factor Dp-2 (E2F dimerization partner 2) (TFDP2), mRNA.
160	NM_015554	All miRNA predictions	3.63	hsa-miR-34a	Genome browser	Homo sapiens glucuronyl C5-epimerase (GLCE), mRNA.
161	NM_000555	All miRNA predictions	3.62	hsa-miR-34a	Genome browser	Homo sapiens doublecortex; lissencephaly, X-linked (doublecortin) (DCX), transcript variant 1, mRNA.
162	NM_006401	All miRNA predictions	3.62	hsa-miR-34a	Genome browser	Homo sapiens acidic (leucine-rich) nuclear phosphoprotein 32 family, member B (ANP32B), mRNA.
163	NM_022737	All miRNA predictions	3.62	hsa-miR-34a	Genome browser	Homo sapiens lipid phosphate phosphatase-related protein type 2 (LPPR2), mRNA.
164	NM_005197	All miRNA predictions	3.61	hsa-miR-34a	Genome browser	Homo sapiens checkpoint suppressor 1 (CHES1), mRNA.
165	NM_024539	All miRNA predictions	3.6	hsa-miR-34a	Genome browser	Homo sapiens ring finger protein 128 (RNF128), transcript variant 2, mRNA.
166	NM_017715	All miRNA predictions	3.59	hsa-miR-34a	Genome browser	Homo sapiens zinc finger protein 3 (A8-51) (ZNF3), mRNA.
167	NM_003942	All miRNA predictions	3.58	hsa-miR-34a	Genome browser	Homo sapiens ribosomal protein S6 kinase, 90kDa, polypeptide 4 (RPS6KA4), transcript variant 1, mRNA.
168	NM_003204	All miRNA predictions	3.55	hsa-miR-34a	Genome browser	Homo sapiens nuclear factor (erythroid-derived 2)-like 1 (NFE2L1), mRNA.
169	NM_003895	All miRNA predictions	3.54	hsa-miR-34a	Genome browser	Homo sapiens synaptojanin 1 (SYNJ1), transcript variant 1, mRNA.
170	NM_006096	All miRNA predictions	3.53	hsa-miR-34a	Genome browser	Homo sapiens N-myc downstream regulated gene 1 (NDRG1), mRNA.
171	NM_006951	All miRNA predictions	3.47	hsa-miR-34a	Genome browser	Homo sapiens TAF5 RNA polymerase II, TATA box binding protein (TBP)-associated factor, 100kDa (TAF5), mRNA.
172	NM_145733	All miRNA predictions	3.43	hsa-miR-34a	Genome browser	Homo sapiens septin 3 (SEPT3), transcript variant A, mRNA.
173	NM_000602	All miRNA predictions	3.43	hsa-miR-34a	Genome browser	Homo sapiens serine (or cysteine) proteinase inhibitor, clade E (nexin, plasminogen activator inhibitor type 1), member 1 (SERPINE1), mRNA.
174	NM_052885	All miRNA predictions	3.42	hsa-miR-34a	Genome browser	Homo sapiens solute carrier family 2 (facilitated glucose transporter), member 13 (SLC2A13), mRNA.
175	NM_003001	All miRNA predictions	3.39	hsa-miR-34a	Genome browser	Homo sapiens succinate dehydrogenase complex, subunit C, integral membrane protein, 15kDa (SDHC), nuclear gene encoding mitochondrial protein, mRNA.
176	NM_015138	All miRNA predictions	3.38	hsa-miR-34a	Genome browser	Homo sapiens KIAA0252 (KIAA0252), mRNA.
177	NM_138734	All miRNA predictions	3.36	hsa-miR-34a	Genome browser	Homo sapiens neurexin 2 (NRXN2), transcript variant beta, mRNA.
178	NM_020783	All miRNA predictions	3.36	hsa-miR-34a	Genome browser	Homo sapiens synaptotagmin IV (SYT4), mRNA.
179	NM_020645	All miRNA predictions	3.35	hsa-miR-34a	Genome browser	Homo sapiens nuclear receptor interacting protein 3 (NRIP3), mRNA.
180	NM_138732	All miRNA predictions	3.35	hsa-miR-34a	Genome browser	Homo sapiens neurexin 2 (NRXN2), transcript variant alpha-2, mRNA.
181	NM_002633	All miRNA predictions	3.35	hsa-miR-34a	Genome browser	Homo sapiens phosphoglucomutase 1 (PGM1), mRNA.
182	NM_002373	All miRNA predictions	3.34	hsa-miR-34a	Genome browser	Homo sapiens microtubule-associated protein 1A (MAP1A), mRNA.
183	NM_003459	All miRNA predictions	3.33	hsa-miR-34a	Genome browser	Homo sapiens solute carrier family 30 (zinc transporter), member 3 (SLC30A3), mRNA.
184	NM_178155	All miRNA predictions	3.33	hsa-miR-34a	Genome browser	Homo sapiens fucosyltransferase 8 (alpha (1,6) fucosyltransferase) (FUT8), transcript variant 1, mRNA.
185	NM_020420	All miRNA predictions	3.33	hsa-miR-34a	Genome browser	Homo sapiens deleted in azoospermia 4 (DAZ4), transcript variant 2, mRNA.
186	NM_004235	All miRNA predictions	3.33	hsa-miR-34a	Genome browser	Homo sapiens Kruppel-like factor 4 (gut) (KLF4), mRNA.
187	NM_013325	All miRNA predictions	3.32	hsa-miR-34a	Genome browser	Homo sapiens APG4 autophagy 4 homolog B (S. cerevisiae) (APG4B), transcript variant 1, mRNA.
188	NM_080617	All miRNA predictions	3.32	hsa-miR-34a	Genome browser	Homo sapiens cerebellin 4 precursor (CBLN4), mRNA.
189	NM_003794	All miRNA predictions	3.32	hsa-miR-34a	Genome browser	Homo sapiens sorting nexin 4 (SNX4), mRNA.
190	NM_016620	All miRNA predictions	3.31	hsa-miR-34a	Genome browser	Homo sapiens zinc finger protein 644 (ZNF644), transcript variant 2, mRNA.
191	NM_005045	All miRNA predictions	3.3	hsa-miR-34a	Genome browser	Homo sapiens reelin (RELN), transcript variant 1, mRNA.
192	NM_018358	All miRNA predictions	3.3	hsa-miR-34a	Genome browser	Homo sapiens ATP-binding cassette, sub-family F (GCN20), member 3 (ABCF3), mRNA.
193	NM_025010	All miRNA predictions	3.3	hsa-miR-34a	Genome browser	Homo sapiens kelch-like 18 (Drosophila) (KLHL18), mRNA.
194	NM_025146	All miRNA predictions	3.3	hsa-miR-34a	Genome browser	Homo sapiens Mak3 homolog (S. cerevisiae) (MAK3), mRNA.
195	NM_025126	All miRNA predictions	3.29	hsa-miR-34a	Genome browser	Homo sapiens ring finger protein 34 (RNF34), transcript variant 2, mRNA.
196	NM_002755	All miRNA predictions	3.29	hsa-miR-34a	Genome browser	Homo sapiens mitogen-activated protein kinase kinase 1 (MAP2K1), mRNA.
197	NM_030791	All miRNA predictions	3.29	hsa-miR-34a	Genome browser	Homo sapiens sphingosine-1-phosphate phosphatase 1 (SGPP1), mRNA.
198	NM_015132	All miRNA predictions	3.28	hsa-miR-34a	Genome browser	Homo sapiens sorting nexin 13 (SNX13), mRNA.
199	NM_178326	All miRNA predictions	3.27	hsa-miR-34a	Genome browser	Homo sapiens APG4 autophagy 4 homolog B (S. cerevisiae) (APG4B), transcript variant 2, mRNA.
200	NM_152600	All miRNA predictions	3.26	hsa-miR-34a	Genome browser	Homo sapiens zinc finger protein 579 (ZNF579), mRNA.
201	NM_138931	All miRNA predictions	3.25	hsa-miR-34a	Genome browser	Homo sapiens B-cell CLL/lymphoma 6 (zinc finger protein 51) (BCL6), transcript variant 2, mRNA.
202	NM_014999	All miRNA predictions	3.25	hsa-miR-34a	Genome browser	Homo sapiens RAB21, member RAS oncogene family (RAB21), mRNA.
203	NM_199485	All miRNA predictions	3.25	hsa-miR-34a	Genome browser	Homo sapiens chromosome 20 open reading frame 24 (C20orf24), transcript variant 4, mRNA.
204	NM_001001485	All miRNA predictions	3.24	hsa-miR-34a	Genome browser	Homo sapiens ATPase, Ca++ transporting, type 2C, member 1 (ATP2C1), transcript variant 3, mRNA.
205	NM_032145	All miRNA predictions	3.24	hsa-miR-34a	Genome browser	Homo sapiens F-box protein 30 (FBXO30), mRNA.
206	NM_177952	All miRNA predictions	3.22	hsa-miR-34a	Genome browser	Homo sapiens protein phosphatase 1A (formerly 2C), magnesium-dependent, alpha isoform (PPM1A), transcript variant 3, mRNA.
207	NM_003626	All miRNA predictions	3.21	hsa-miR-34a	Genome browser	Homo sapiens protein tyrosine phosphatase, receptor type, f polypeptide (PTPRF), interacting protein (liprin), alpha 1 (PPFIA1), transcript variant 2, mRNA.
208	NM_173172	All miRNA predictions	3.2	hsa-miR-34a	Genome browser	Homo sapiens nuclear receptor subfamily 4, group A, member 2 (NR4A2), transcript variant 3, mRNA.
209	NM_183387	All miRNA predictions	3.18	hsa-miR-34a	Genome browser	Homo sapiens echinoderm microtubule associated protein like 5 (EML5), mRNA.
210	NM_198681	All miRNA predictions	3.16	hsa-miR-34a	Genome browser	Homo sapiens putative NFkB activating protein (KIAA0720), transcript variant 2, mRNA.
211	NM_015352	All miRNA predictions	3.16	hsa-miR-34a	Genome browser	Homo sapiens protein O-fucosyltransferase 1 (POFUT1), transcript variant 1, mRNA.
212	NM_001584	All miRNA predictions	3.16	hsa-miR-34a	Genome browser	Homo sapiens chromosome 11 open reading frame 8 (C11orf8), mRNA.
213	NM_006228	All miRNA predictions	3.16	hsa-miR-34a	Genome browser	Homo sapiens prepronociceptin (PNOC), mRNA.
214	NM_004069	All miRNA predictions	3.13	hsa-miR-34a	Genome browser	Homo sapiens adaptor-related protein complex 2, sigma 1 subunit (AP2S1), transcript variant AP17, mRNA.
215	NM_014574	All miRNA predictions	3.12	hsa-miR-34a	Genome browser	Homo sapiens striatin, calmodulin binding protein 3 (STRN3), mRNA.
216	NM_014325	All miRNA predictions	3.11	hsa-miR-34a	Genome browser	Homo sapiens coronin, actin binding protein, 1C (CORO1C), mRNA.
217	NM_001002847	All miRNA predictions	3.1	hsa-miR-34a	Genome browser	Homo sapiens decreased expression in renal and prostate (DERPC), transcript variant 2, mRNA.
218	NM_001332	All miRNA predictions	3.08	hsa-miR-34a	Genome browser	Homo sapiens catenin (cadherin-associated protein), delta 2 (neural plakophilin-related arm-repeat protein) (CTNND2), mRNA.
219	NM_199484	All miRNA predictions	3.08	hsa-miR-34a	Genome browser	Homo sapiens chromosome 20 open reading frame 24 (C20orf24), transcript variant 3, mRNA.
220	NM_000844	All miRNA predictions	3.07	hsa-miR-34a	Genome browser	Homo sapiens glutamate receptor, metabotropic 7 (GRM7), transcript variant 1, mRNA.
221	NM_001406	All miRNA predictions	3.07	hsa-miR-34a	Genome browser	Homo sapiens ephrin-B3 (EFNB3), mRNA.
222	NM_153757	All miRNA predictions	3.05	hsa-miR-34a	Genome browser	Homo sapiens nucleosome assembly protein 1-like 5 (NAP1L5), mRNA.
223	NM_017559	All miRNA predictions	3.05	hsa-miR-34a	Genome browser	Homo sapiens hypothetical protein DKFZp434H2215 (DKFZp434H2215), mRNA.
224	NM_006603	All miRNA predictions	3.04	hsa-miR-34a	Genome browser	Homo sapiens stromal antigen 2 (STAG2), mRNA.
225	NM_004529	All miRNA predictions	3.04	hsa-miR-34a	Genome browser	Homo sapiens myeloid/lymphoid or mixed-lineage leukemia (trithorax homolog, Drosophila); translocated to, 3 (MLLT3), mRNA.
226	NM_015192	All miRNA predictions	3.03	hsa-miR-34a	Genome browser	Homo sapiens phospholipase C, beta 1 (phosphoinositide-specific) (PLCB1), transcript variant 1, mRNA.
227	NM_019590	All miRNA predictions	3.02	hsa-miR-34a	Genome browser	Homo sapiens KIAA1217 (KIAA1217), mRNA.
228	NM_015071	All miRNA predictions	3.02	hsa-miR-34a	Genome browser	Homo sapiens Rho GTPase activating protein 26 (ARHGAP26), mRNA.
229	NM_152272	All miRNA predictions	3.01	hsa-miR-34a	Genome browser	Homo sapiens hypothetical protein MGC29816 (MGC29816), mRNA.
230	NM_152424	All miRNA predictions	3.01	hsa-miR-34a	Genome browser	Homo sapiens hypothetical protein FLJ39827 (FLJ39827), mRNA.
231	NM_014655	All miRNA predictions	3	hsa-miR-34a	Genome browser	Homo sapiens KIAA0446 gene product (KIAA0446), mRNA.
232	NM_024721	All miRNA predictions	3	hsa-miR-34a	Genome browser	Homo sapiens zinc finger homeodomain 4 (ZFHX4), mRNA.
233	NM_005756	All miRNA predictions	3	hsa-miR-34a	Genome browser	Homo sapiens G protein-coupled receptor 64 (GPR64), mRNA.
234	NM_016505	All miRNA predictions	3	hsa-miR-34a	Genome browser	Homo sapiens putative S1 RNA binding domain protein (PS1D), mRNA.
235	NM_181874	All miRNA predictions	2.99	hsa-miR-34a	Genome browser	Homo sapiens glutamate receptor, metabotropic 7 (GRM7), transcript variant 2, mRNA.
236	NM_007249	All miRNA predictions	2.97	hsa-miR-34a	Genome browser	Homo sapiens Kruppel-like factor 12 (KLF12), transcript variant 1, mRNA.
237	NM_145734	All miRNA predictions	2.95	hsa-miR-34a	Genome browser	Homo sapiens septin 3 (SEPT3), transcript variant C, mRNA.
238	NM_002193	All miRNA predictions	2.95	hsa-miR-34a	Genome browser	Homo sapiens inhibin, beta B (activin AB beta polypeptide) (INHBB), mRNA.
239	NM_012200	All miRNA predictions	2.94	hsa-miR-34a	Genome browser	Homo sapiens beta-1,3-glucuronyltransferase 3 (glucuronosyltransferase I) (B3GAT3), mRNA.
240	NM_016626	All miRNA predictions	2.93	hsa-miR-34a	Genome browser	Homo sapiens ring finger and KH domain containing 2 (RKHD2), mRNA.
241	NM_032682	All miRNA predictions	2.91	hsa-miR-34a	Genome browser	Homo sapiens forkhead box P1 (FOXP1), mRNA.
242	NM_004438	All miRNA predictions	2.9	hsa-miR-34a	Genome browser	Homo sapiens EPH receptor A4 (EPHA4), mRNA.
243	NM_006336	All miRNA predictions	2.88	hsa-miR-34a	Genome browser	Homo sapiens chromosome 9 open reading frame 60 (C9orf60), mRNA.
244	NM_006320	All miRNA predictions	2.88	hsa-miR-34a	Genome browser	Homo sapiens progesterone receptor membrane component 2 (PGRMC2), mRNA.
245	NM_004337	All miRNA predictions	2.87	hsa-miR-34a	Genome browser	Homo sapiens chromosome 8 open reading frame 1 (C8orf1), mRNA.
246	NM_005736	All miRNA predictions	2.87	hsa-miR-34a	Genome browser	Homo sapiens ARP1 actin-related protein 1 homolog A, centractin alpha (yeast) (ACTR1A), mRNA.
247	NM_147131	All miRNA predictions	2.86	hsa-miR-34a	Genome browser	Homo sapiens galactose-1-phosphate uridylyltransferase (GALT), transcript variant 2, mRNA.
248	NM_152306	All miRNA predictions	2.85	hsa-miR-34a	Genome browser	Homo sapiens ubiquitin-like, containing PHD and RING finger domains, 2 (UHRF2), transcript variant 1, mRNA.
249	NM_018133	All miRNA predictions	2.8	hsa-miR-34a	Genome browser	Homo sapiens hypothetical protein FLJ10546 (FLJ10546), mRNA.
250	NM_001092	All miRNA predictions	2.79	hsa-miR-34a	Genome browser	Homo sapiens active BCR-related gene (ABR), transcript variant 2, mRNA.
251	NM_000965	All miRNA predictions	2.79	hsa-miR-34a	Genome browser	Homo sapiens retinoic acid receptor, beta (RARB), transcript variant 1, mRNA.
252	NM_014901	All miRNA predictions	2.77	hsa-miR-34a	Genome browser	Homo sapiens ring finger protein 44 (RNF44), mRNA.
253	NM_022735	All miRNA predictions	2.76	hsa-miR-34a	Genome browser	Homo sapiens acyl-Coenzyme A binding domain containing 3 (ACBD3), mRNA.
254	NM_182734	All miRNA predictions	2.76	hsa-miR-34a	Genome browser	Homo sapiens phospholipase C, beta 1 (phosphoinositide-specific) (PLCB1), transcript variant 2, mRNA.
255	NM_002632	All miRNA predictions	2.73	hsa-miR-34a	Genome browser	Homo sapiens placental growth factor, vascular endothelial growth factor-related protein (PGF), mRNA.
256	NM_182970	All miRNA predictions	2.73	hsa-miR-34a	Genome browser	Homo sapiens regulating synaptic membrane exocytosis 4 (RIMS4), mRNA.
257	NM_024092	All miRNA predictions	2.71	hsa-miR-34a	Genome browser	Homo sapiens hypothetical protein MGC5508 (MGC5508), mRNA.
258	NM_018711	All miRNA predictions	2.7	hsa-miR-34a	Genome browser	Homo sapiens hypothetical protein DKFZp761H039 (DKFZp761H039), mRNA.
259	NM_015455	All miRNA predictions	2.69	hsa-miR-34a	Genome browser	Homo sapiens carbon catabolite repression 4 protein (KIAA1194), mRNA.
260	NM_005211	All miRNA predictions	2.67	hsa-miR-34a	Genome browser	Homo sapiens colony stimulating factor 1 receptor, formerly McDonough feline sarcoma viral (v-fms) oncogene homolog (CSF1R), mRNA.
261	NM_001995	All miRNA predictions	2.66	hsa-miR-34a	Genome browser	Homo sapiens acyl-CoA synthetase long-chain family member 1 (ACSL1), mRNA.
262	NM_002731	All miRNA predictions	2.66	hsa-miR-34a	Genome browser	Homo sapiens protein kinase, cAMP-dependent, catalytic, beta (PRKACB), transcript variant 2, mRNA.
263	NM_020062	All miRNA predictions	2.66	hsa-miR-34a	Genome browser	Homo sapiens SLC2A4 regulator (SLC2A4RG), mRNA.
264	NM_003205	All miRNA predictions	2.64	hsa-miR-34a	Genome browser	Homo sapiens transcription factor 12 (HTF4, helix-loop-helix transcription factors 4) (TCF12), transcript variant 3, mRNA.
265	NM_022730	All miRNA predictions	2.64	hsa-miR-34a	Genome browser	Homo sapiens COP9 constitutive photomorphogenic homolog subunit 7B (Arabidopsis) (COPS7B), mRNA.
266	NM_000723	All miRNA predictions	2.62	hsa-miR-34a	Genome browser	Homo sapiens calcium channel, voltage-dependent, beta 1 subunit (CACNB1), transcript variant 1, mRNA.
267	NM_005785	All miRNA predictions	2.6	hsa-miR-34a	Genome browser	Homo sapiens ring finger protein 41 (RNF41), transcript variant 1, mRNA.
268	NM_004451	All miRNA predictions	2.6	hsa-miR-34a	Genome browser	Homo sapiens estrogen-related receptor alpha (ESRRA), mRNA.
269	NM_183377	All miRNA predictions	2.59	hsa-miR-34a	Genome browser	Homo sapiens amiloride-sensitive cation channel 1, neuronal (degenerin) (ACCN1), transcript variant 1, mRNA.
270	NM_020428	All miRNA predictions	2.58	hsa-miR-34a	Genome browser	Homo sapiens CTL2 gene (CTL2), mRNA.
271	NM_015447	All miRNA predictions	2.58	hsa-miR-34a	Genome browser	Homo sapiens calmodulin regulated spectrin-associated protein 1 (CAMSAP1), mRNA.
272	NM_139279	All miRNA predictions	2.58	hsa-miR-34a	Genome browser	Homo sapiens multiple coagulation factor deficiency 2 (MCFD2), mRNA.
273	NM_015336	All miRNA predictions	2.57	hsa-miR-34a	Genome browser	Homo sapiens zinc finger, DHHC domain containing 17 (ZDHHC17), mRNA.
274	NM_030576	All miRNA predictions	2.55	hsa-miR-34a	Genome browser	Homo sapiens hypothetical protein MGC10986 (MGC10986), mRNA.
275	NM_005182	All miRNA predictions	2.54	hsa-miR-34a	Genome browser	Homo sapiens carbonic anhydrase VII (CA7), mRNA.
276	NM_207444	All miRNA predictions	2.54	hsa-miR-34a	Genome browser	Homo sapiens FLJ35695 protein (FLJ35695), mRNA.
277	NM_017699	All miRNA predictions	2.5	hsa-miR-34a	Genome browser	Homo sapiens SID1 transmembrane family, member 1 (SIDT1), mRNA.
278	NM_001004317	All miRNA predictions	2.49	hsa-miR-34a	Genome browser	Homo sapiens FLJ16517 protein (FLJ16517), mRNA.
279	NM_020178	All miRNA predictions	2.46	hsa-miR-34a	Genome browser	Homo sapiens carbonic anhydrase X (CA10), mRNA.
280	NM_024085	All miRNA predictions	2.43	hsa-miR-34a	Genome browser	Homo sapiens hypothetical protein FLJ22169 (FLJ22169), mRNA.
281	NM_017629	All miRNA predictions	2.43	hsa-miR-34a	Genome browser	Homo sapiens eukaryotic translation initiation factor 2C, 4 (EIF2C4), mRNA.
282	NM_024015	All miRNA predictions	2.41	hsa-miR-34a	Genome browser	Homo sapiens homeo box B4 (HOXB4), mRNA.
283	NM_017590	All miRNA predictions	2.41	hsa-miR-34a	Genome browser	Homo sapiens rotavirus X protein associated with NSP3 (RoXaN), mRNA.
284	NM_018157	All miRNA predictions	2.39	hsa-miR-34a	Genome browser	Homo sapiens brain synembryn (hSyn), mRNA.
285	NM_019085	All miRNA predictions	2.39	hsa-miR-34a	Genome browser	Homo sapiens F-box and leucine-rich repeat protein 19 (FBXL19), mRNA.
286	NM_018184	All miRNA predictions	2.38	hsa-miR-34a	Genome browser	Homo sapiens ADP-ribosylation factor-like 10C (ARL10C), mRNA.
287	NM_182485	All miRNA predictions	2.38	hsa-miR-34a	Genome browser	Homo sapiens cytoplasmic polyadenylation element binding protein 2 (CPEB2), transcript variant B, mRNA.
288	NM_017933	All miRNA predictions	2.38	hsa-miR-34a	Genome browser	Homo sapiens hypothetical protein FLJ20701 (FLJ20701), mRNA.
289	NM_005876	All miRNA predictions	2.37	hsa-miR-34a	Genome browser	Homo sapiens aortic preferentially expressed protein 1 (APEG1), mRNA.
290	NM_003615	All miRNA predictions	2.37	hsa-miR-34a	Genome browser	Homo sapiens solute carrier family 4, sodium bicarbonate cotransporter, member 7 (SLC4A7), mRNA.
291	NM_052840	All miRNA predictions	2.37	hsa-miR-34a	Genome browser	Homo sapiens bruno-like 6, RNA binding protein (Drosophila) (BRUNOL6), mRNA.
292	NM_000598	All miRNA predictions	2.36	hsa-miR-34a	Genome browser	Homo sapiens insulin-like growth factor binding protein 3 (IGFBP3), mRNA.
293	NM_030805	All miRNA predictions	2.36	hsa-miR-34a	Genome browser	Homo sapiens lectin, mannose-binding 2-like (LMAN2L), mRNA.
294	NM_000302	All miRNA predictions	2.35	hsa-miR-34a	Genome browser	Homo sapiens procollagen-lysine, 2-oxoglutarate 5-dioxygenase (lysine hydroxylase, Ehlers-Danlos syndrome type VI) (PLOD), mRNA.
295	NM_004382	All miRNA predictions	2.35	hsa-miR-34a	Genome browser	Homo sapiens corticotropin releasing hormone receptor 1 (CRHR1), mRNA.
296	NM_175854	All miRNA predictions	2.34	hsa-miR-34a	Genome browser	Homo sapiens PABP1-dependent poly A-specific ribonuclease subunit PAN3 (PAN3), mRNA.
297	NM_001148	All miRNA predictions	2.34	hsa-miR-34a	Genome browser	Homo sapiens ankyrin 2, neuronal (ANK2), transcript variant 1, mRNA.
298	NM_003139	All miRNA predictions	2.33	hsa-miR-34a	Genome browser	Homo sapiens signal recognition particle receptor ('docking protein') (SRPR), mRNA.
299	NM_015100	All miRNA predictions	2.32	hsa-miR-34a	Genome browser	Homo sapiens pogo transposable element with ZNF domain (POGZ), transcript variant 1, mRNA.
300	NM_005910	All miRNA predictions	2.32	hsa-miR-34a	Genome browser	Homo sapiens microtubule-associated protein tau (MAPT), transcript variant 2, mRNA.
301	NM_001699	All miRNA predictions	2.32	hsa-miR-34a	Genome browser	Homo sapiens AXL receptor tyrosine kinase (AXL), transcript variant 2, mRNA.
302	NM_000725	All miRNA predictions	2.31	hsa-miR-34a	Genome browser	Homo sapiens calcium channel, voltage-dependent, beta 3 subunit (CACNB3), mRNA.
303	NM_002714	All miRNA predictions	2.3	hsa-miR-34a	Genome browser	Homo sapiens protein phosphatase 1, regulatory subunit 10 (PPP1R10), mRNA.
304	NM_016022	All miRNA predictions	2.29	hsa-miR-34a	Genome browser	Homo sapiens likely ortholog of C. elegans anterior pharynx defective 1A (APH-1A), mRNA.
305	NM_004370	All miRNA predictions	2.28	hsa-miR-34a	Genome browser	Homo sapiens collagen, type XII, alpha 1 (COL12A1), transcript variant long, mRNA.
306	NM_001949	All miRNA predictions	2.28	hsa-miR-34a	Genome browser	Homo sapiens E2F transcription factor 3 (E2F3), mRNA.
307	NM_005095	All miRNA predictions	2.27	hsa-miR-34a	Genome browser	Homo sapiens zinc finger protein 262 (ZNF262), mRNA.
308	NM_001789	All miRNA predictions	2.27	hsa-miR-34a	Genome browser	Homo sapiens cell division cycle 25A (CDC25A), transcript variant 1, mRNA.
309	NM_020210	All miRNA predictions	2.25	hsa-miR-34a	Genome browser	Homo sapiens sema domain, immunoglobulin domain (Ig), transmembrane domain (TM) and short cytoplasmic domain, (semaphorin) 4B (SEMA4B), transcript variant 1, mRNA.
310	NM_016532	All miRNA predictions	2.24	hsa-miR-34a	Genome browser	Homo sapiens skeletal muscle and kidney enriched inositol phosphatase (SKIP), transcript variant 1, mRNA.
311	NM_017938	All miRNA predictions	2.21	hsa-miR-34a	Genome browser	Homo sapiens hypothetical protein FLJ20716 (FLJ20716), mRNA.
312	NM_000868	All miRNA predictions	2.21	hsa-miR-34a	Genome browser	Homo sapiens 5-hydroxytryptamine (serotonin) receptor 2C (HTR2C), mRNA.
313	NM_022763	All miRNA predictions	2.21	hsa-miR-34a	Genome browser	Homo sapiens factor for adipocyte differentiation 104 (FAD104), mRNA.
314	NM_020750	All miRNA predictions	2.19	hsa-miR-34a	Genome browser	Homo sapiens exportin 5 (XPO5), mRNA.
315	NM_032982	All miRNA predictions	2.19	hsa-miR-34a	Genome browser	Homo sapiens caspase 2, apoptosis-related cysteine protease (neural precursor cell expressed, developmentally down-regulated 2) (CASP2), transcript variant 1, mRNA.
316	NM_003107	All miRNA predictions	2.18	hsa-miR-34a	Genome browser	Homo sapiens SRY (sex determining region Y)-box 4 (SOX4), mRNA.
317	NM_018987	All miRNA predictions	2.17	hsa-miR-34a	Genome browser	Homo sapiens sema domain, seven thrombospondin repeats (type 1 and type 1-like), transmembrane domain (TM) and short cytoplasmic domain, (semaphorin) 5B (SEMA5B), mRNA.
318	NM_003632	All miRNA predictions	2.17	hsa-miR-34a	Genome browser	Homo sapiens contactin associated protein 1 (CNTNAP1), mRNA.
319	NM_001005210	All miRNA predictions	2.16	hsa-miR-34a	Genome browser	Homo sapiens FLJ45686 protein (FLJ45686), mRNA.
320	NM_007185	All miRNA predictions	2.14	hsa-miR-34a	Genome browser	Homo sapiens trinucleotide repeat containing 4 (TNRC4), mRNA.
321	NM_144677	All miRNA predictions	2.11	hsa-miR-34a	Genome browser	Homo sapiens mannosyl (alpha-1,6-)-glycoprotein beta-1,6-N-acetyl-glucosaminyltransferase, isoenzyme B (MGAT5B), transcript variant 1, mRNA.
322	NM_032431	All miRNA predictions	2.1	hsa-miR-34a	Genome browser	Homo sapiens synovial apoptosis inhibitor 1, synoviolin (SYVN1), transcript variant 1, mRNA.
323	NM_014289	All miRNA predictions	2.08	hsa-miR-34a	Genome browser	Homo sapiens calpain 6 (CAPN6), mRNA.
324	NM_003373	All miRNA predictions	2.08	hsa-miR-34a	Genome browser	Homo sapiens vinculin (VCL), transcript variant 2, mRNA.
325	NM_014141	All miRNA predictions	2.07	hsa-miR-34a	Genome browser	Homo sapiens contactin associated protein-like 2 (CNTNAP2), mRNA.
326	NM_080867	All miRNA predictions	2.06	hsa-miR-34a	Genome browser	Homo sapiens suppressor of cytokine signaling 4 (SOCS4), transcript variant 2, mRNA.
327	NM_004059	All miRNA predictions	2.05	hsa-miR-34a	Genome browser	Homo sapiens cysteine conjugate-beta lyase; cytoplasmic (glutamine transaminase K, kyneurenine aminotransferase) (CCBL1), mRNA.
328	NM_006237	All miRNA predictions	2.05	hsa-miR-34a	Genome browser	Homo sapiens POU domain, class 4, transcription factor 1 (POU4F1), mRNA.
329	NM_171982	All miRNA predictions	2.03	hsa-miR-34a	Genome browser	Homo sapiens tripartite motif-containing 35 (TRIM35), transcript variant 2, mRNA.
330	NM_015215	All miRNA predictions	2.01	hsa-miR-34a	Genome browser	Homo sapiens calmodulin binding transcription activator 1 (CAMTA1), mRNA.
331	NM_014562	All miRNA predictions	2.01	hsa-miR-34a	Genome browser	Homo sapiens orthodenticle homolog 1 (Drosophila) (OTX1), mRNA.
332	NM_033425	All miRNA predictions	1.99	hsa-miR-34a	Genome browser	Homo sapiens DIX domain containing 1 (DIXDC1), mRNA.
333	NM_031483	All miRNA predictions	1.98	hsa-miR-34a	Genome browser	Homo sapiens itchy homolog E3 ubiquitin protein ligase (mouse) (ITCH), mRNA.
334	NM_015568	All miRNA predictions	1.95	hsa-miR-34a	Genome browser	Homo sapiens protein phosphatase 1, regulatory (inhibitor) subunit 16B (PPP1R16B), mRNA.
335	NM_005109	All miRNA predictions	1.93	hsa-miR-34a	Genome browser	Homo sapiens oxidative-stress responsive 1 (OSR1), mRNA.
336	NM_003768	All miRNA predictions	1.92	hsa-miR-34a	Genome browser	Homo sapiens phosphoprotein enriched in astrocytes 15 (PEA15), mRNA.
337	NM_001224	All miRNA predictions	1.9	hsa-miR-34a	Genome browser	Homo sapiens caspase 2, apoptosis-related cysteine protease (neural precursor cell expressed, developmentally down-regulated 2) (CASP2), transcript variant 2, mRNA.
338	NM_207362	All miRNA predictions	1.86	hsa-miR-34a	Genome browser	Homo sapiens similar to 2010300C02Rik protein (MGC42367), mRNA.
339	NM_005397	All miRNA predictions	1.86	hsa-miR-34a	Genome browser	Homo sapiens podocalyxin-like (PODXL), mRNA.
340	NM_015328	All miRNA predictions	1.83	hsa-miR-34a	Genome browser	Homo sapiens KIAA0828 protein (KIAA0828), mRNA.
341	NM_053056	All miRNA predictions	1.81	hsa-miR-34a	Genome browser	Homo sapiens cyclin D1 (PRAD1: parathyroid adenomatosis 1) (CCND1), mRNA.
342	NM_000966	All miRNA predictions	1.77	hsa-miR-34a	Genome browser	Homo sapiens retinoic acid receptor, gamma (RARG), mRNA.
343	NM_001331	All miRNA predictions	1.72	hsa-miR-34a	Genome browser	Homo sapiens catenin (cadherin-associated protein), delta 1 (CTNND1), mRNA.
344	NM_005430	All miRNA predictions	1.68	hsa-miR-34a	Genome browser	Homo sapiens wingless-type MMTV integration site family, member 1 (WNT1), mRNA.
345	NM_175931	All miRNA predictions	1.68	hsa-miR-34a	Genome browser	Homo sapiens core-binding factor, runt domain, alpha subunit 2; translocated to, 3 (CBFA2T3), transcript variant 2, mRNA.
346	NM_032983	All miRNA predictions	1.68	hsa-miR-34a	Genome browser	Homo sapiens caspase 2, apoptosis-related cysteine protease (neural precursor cell expressed, developmentally down-regulated 2) (CASP2), transcript variant 3, mRNA.
347	NM_004992	All miRNA predictions	1.59	hsa-miR-34a	Genome browser	Homo sapiens methyl CpG binding protein 2 (Rett syndrome) (MECP2), mRNA.
348	NM_005137	All miRNA predictions	1.55	hsa-miR-34a	Genome browser	Homo sapiens DiGeorge syndrome critical region gene 2 (DGCR2), mRNA.
349	NM_023938	All miRNA predictions	1.42	hsa-miR-34a	Genome browser	Homo sapiens specifically androgen-regulated protein (SARG), mRNA.
350	NM_000633	All miRNA predictions	1.34	hsa-miR-34a	Genome browser	Homo sapiens B-cell CLL/lymphoma 2 (BCL2), nuclear gene encoding mitochondrial protein, transcript variant alpha, mRNA.
351	NM_194278	All miRNA predictions	1.25	hsa-miR-34a	Genome browser	Homo sapiens chromosome 14 open reading frame 43 (C14orf43), mRNA.
352	NM_005840	All miRNA predictions	1.07	hsa-miR-34a	Genome browser	Homo sapiens sprouty homolog 3 (Drosophila) (SPRY3), mRNA.
353	NM_003605	All miRNA predictions	0.97	hsa-miR-34a	Genome browser	Homo sapiens O-linked N-acetylglucosamine (GlcNAc) transferase (UDP-N-acetylglucosamine:polypeptide-N-acetylglucosaminyl transferase) (OGT), transcript variant 3, mRNA.
354	NM_032932	All miRNA predictions	0.9	hsa-miR-34a	Genome browser	Homo sapiens RAB11 family interacting protein 4 (class II) (RAB11FIP4), mRNA.
